# Supplementary material for: Current and future trends in socio-economic, demographic and governance factors affecting global primate conservation
Source: PeerJ. 2020 Aug 21;8:e9816. doi: 10.7717/peerj.9816 (PMC7444509; doi:10.7717/peerj.9816)
Supplement: Supplemental Information 12 — Future projections of human population growth and GDP|PPP under five Shared Socio-Economic Pathway Scenarios (SSPs) from 2010 to 2100 for each primate region (the Neotropics, mainland Africa, Madagascar, South Asia and Southeast Asia) were obtained from IIASA SSPd database. (https://tntcat.iiasa.ac.at/SspDb/dsd?Action=htmlpage&page=about). [file peerj-08-9816-s012.xlsx]

## Sheet: Population GDP GDPPC 2010-2100
SCENARIO	Country ISO code	Country name	Primate Region	VARIABLE	UNIT	2010	2015	2020	2025	2030	2035	2040	2045	2050	2055	2060	2065	2070	2075	2080	2085	2090	2095	2100		SCENARIO	Country ISO code	Country name	Primate Region	VARIABLE	UNIT	2010	2015	2020	2025	2030	2035	2040	2045	2050	2055	2060	2065	2070	2075	2080	2085	2090	2095
SSP1	AFG	Afghanistan	South Asia	Population	million	31.412	35.352	39.535	43.719	47.674	51.489	55.001	58.082	60.68	62.846	64.557	65.929	66.94	67.569	67.824	67.715	67.261	66.475	65.377		SSP1	AFG	Afghanistan	South Asia	GDP|PPP	billion US$2005/yr	37.237	47.643	59.153	78.506	109.567	157.25	227.005	324.841	456.674	627.328	839.381	1094.14	1389.58	1722.01	2086.19	2474.19	2878.71	3293.2
SSP2	AFG	Afghanistan	South Asia	Population	million	31.412	35.754	40.602	45.942	51.689	57.639	63.599	69.469	75.162	80.643	85.822	90.688	95.121	99.193	102.899	106.176	108.98	111.263	113.086		SSP2	AFG	Afghanistan	South Asia	GDP|PPP	billion US$2005/yr	37.237	48.185	60.175	77.749	101.896	134.116	177.824	236.506	314.371	415.985	546.228	711.887	920.484	1180.44	1499.32	1884.33	2341.09	2874.95
SSP3	AFG	Afghanistan	South Asia	Population	million	31.412	36.104	41.886	48.674	56.29	64.322	72.827	81.918	91.579	101.424	111.268	121.021	130.67	140.241	149.558	158.566	167.054	174.906	181.926		SSP3	AFG	Afghanistan	South Asia	GDP|PPP	billion US$2005/yr	37.237	48.657	61.865	79.552	101.892	129.443	164.742	209.418	264.787	331.875	411.876	506.733	618.176	747.105	892.395	1053.03	1228.3	1417.8
SSP4	AFG	Afghanistan	South Asia	Population	million	31.412	36.022	41.6	48.011	55.153	62.642	70.545	78.954	87.831	96.795	105.685	114.52	123.324	132.126	140.76	149.175	157.181	164.686	171.515		SSP4	AFG	Afghanistan	South Asia	GDP|PPP	billion US$2005/yr	37.237	48.546	61.385	78.194	98.723	122.492	151.755	187.387	229.826	279.199	335.745	400.507	474.222	556.956	647.457	745.098	849.658	961.343
SSP5	AFG	Afghanistan	South Asia	Population	million	31.412	35.269	39.247	43.069	46.594	49.924	52.874	55.305	57.179	58.569	59.474	60.104	60.457	60.528	60.347	59.941	59.335	58.546	57.594		SSP5	AFG	Afghanistan	South Asia	GDP|PPP	billion US$2005/yr	37.237	47.532	58.848	79.059	114.303	171.645	257.527	380.116	547.707	767.62	1044.54	1383.54	1785.19	2249.36	2776.64	3362.68	4004.53	4700.2
SSP1	DZA	Algeria	Mainland Africa	Population	million	35.468	37.851	39.953	41.645	42.912	43.939	44.761	45.328	45.548	45.412	44.937	44.194	43.232	42.077	40.756	39.313	37.811	36.251	34.557		SSP1	DZA	Algeria	Mainland Africa	GDP|PPP	billion US$2005/yr	268.295	310.773	376.244	462.689	559.447	657.912	757.912	873.644	1006.33	1152	1310.09	1478.76	1640.13	1786.91	1919.87	2039.51	2150.41	2252.57
SSP2	DZA	Algeria	Mainland Africa	Population	million	35.468	38.053	40.528	42.713	44.519	46.063	47.437	48.64	49.525	50.017	50.132	49.977	49.609	49.103	48.487	47.791	47.08	46.356	45.601		SSP2	DZA	Algeria	Mainland Africa	GDP|PPP	billion US$2005/yr	268.295	312.438	380.324	463.917	545.477	612.169	671.988	743.584	833.754	940.422	1063.99	1205.1	1354.56	1508.44	1665.41	1826.05	1994.09	2170.8
SSP3	DZA	Algeria	Mainland Africa	Population	million	35.468	38.284	41.26	44.157	46.828	49.238	51.57	53.881	56.114	58.097	59.781	61.251	62.663	64.173	65.84	67.619	69.44	71.253	73.064		SSP3	DZA	Algeria	Mainland Africa	GDP|PPP	billion US$2005/yr	268.295	314.331	385.55	468.551	542.086	588.097	611.045	632.788	666.814	713.937	773.838	846.636	927.234	1015.34	1109.48	1208.82	1315.77	1432.04
SSP4	DZA	Algeria	Mainland Africa	Population	million	35.468	37.905	40.143	41.979	43.357	44.447	45.286	45.843	46.018	45.79	45.166	44.224	43.046	41.708	40.283	38.82	37.353	35.884	34.402		SSP4	DZA	Algeria	Mainland Africa	GDP|PPP	billion US$2005/yr	268.295	311.22	376.567	457.349	537.446	601.638	649.352	700.43	767.036	848.826	944.583	1051.24	1157.8	1260.79	1360.57	1457.32	1554.49	1652.71
SSP5	DZA	Algeria	Mainland Africa	Population	million	35.468	37.823	39.865	41.464	42.637	43.57	44.294	44.762	44.889	44.664	44.107	43.295	42.276	41.08	39.735	38.283	36.786	35.243	33.58		SSP5	DZA	Algeria	Mainland Africa	GDP|PPP	billion US$2005/yr	268.295	310.547	375.745	469.749	587.826	721.954	865.592	1033.2	1226.77	1444.55	1688.65	1958.77	2231.89	2498.7	2760.51	3017.64	3276.94	3538.84
SSP1	AGO	Angola	Mainland Africa	Population	million	19.082	21.776	24.583	27.315	29.851	32.27	34.507	36.511	38.247	39.733	40.97	41.954	42.671	43.118	43.296	43.216	42.885	42.316	41.536		SSP1	AGO	Angola	Mainland Africa	GDP|PPP	billion US$2005/yr	98.686	127.295	171.984	203.363	232.32	261.469	304.102	369.997	464.994	591.431	750.86	942.049	1160.28	1400.12	1655.05	1917.63	2181.82	2441.16
SSP2	AGO	Angola	Mainland Africa	Population	million	19.082	22.013	25.239	28.561	31.855	35.045	38.164	41.145	43.976	46.546	48.856	50.867	52.598	53.997	55.142	56.03	56.598	56.881	56.892		SSP2	AGO	Angola	Mainland Africa	GDP|PPP	billion US$2005/yr	98.686	128.679	172.787	200.062	218.446	228.144	244.75	275.557	324.819	394.374	486.447	603.49	747.486	919.388	1119.58	1347.31	1601.58	1881.08
SSP3	AGO	Angola	Mainland Africa	Population	million	19.082	22.042	25.492	29.331	33.357	37.349	41.337	45.413	49.523	53.497	57.25	60.767	64.069	67.19	70.116	72.864	75.26	77.465	79.305		SSP3	AGO	Angola	Mainland Africa	GDP|PPP	billion US$2005/yr	98.686	128.849	171.468	199.156	217.801	223.319	225.297	231.799	247.196	272.098	306.201	349.531	401.771	462.706	531.346	606.858	688.203	776.162
SSP4	AGO	Angola	Mainland Africa	Population	million	19.082	22.075	25.588	29.514	33.626	37.696	41.752	45.89	50.051	54.064	57.841	61.361	64.645	67.725	70.586	73.243	75.517	77.569	79.222		SSP4	AGO	Angola	Mainland Africa	GDP|PPP	billion US$2005/yr	98.686	129.041	172.16	201.272	225.039	240.4	257.078	284.463	329.09	394.028	481.667	594.862	736.232	907.959	1110.02	1342.22	1602.83	1893.98
SSP5	AGO	Angola	Mainland Africa	Population	million	19.082	21.792	24.635	27.422	30.014	32.489	34.785	36.85	38.646	40.188	41.474	42.497	43.245	43.712	43.903	43.825	43.488	42.905	42.105		SSP5	AGO	Angola	Mainland Africa	GDP|PPP	billion US$2005/yr	98.686	127.389	173.632	214.748	264.116	323.521	401.276	510.353	663.75	869.382	1133.13	1456.09	1833.66	2260.13	2727.86	3227.71	3752.11	4292.04
SSP1	ARG	Argentina	Neotropics	Population	million	40.412	41.866	43.044	43.956	44.611	45.095	45.367	45.39	45.173	44.762	44.177	43.445	42.562	41.53	40.356	38.935	37.319	35.563	33.709		SSP1	ARG	Argentina	Neotropics	GDP|PPP	billion US$2005/yr	580.427	715.981	861.408	1034.76	1234.96	1460.15	1689.62	1908.12	2112.17	2302.36	2478.59	2639.01	2778.38	2890.06	2983.8	3057.45	3111.06	3144.99
SSP2	ARG	Argentina	Neotropics	Population	million	40.412	42.045	43.57	44.939	46.155	47.219	48.142	48.854	49.377	49.702	49.834	49.83	49.664	49.35	48.902	48.392	47.83	47.222	46.575		SSP2	ARG	Argentina	Neotropics	GDP|PPP	billion US$2005/yr	580.427	719.037	867.442	1027.99	1198.22	1375.8	1553.99	1730.24	1911.36	2098.05	2288.14	2480.41	2671.43	2857.56	3041.83	3225.98	3411.15	3595.48
SSP3	ARG	Argentina	Neotropics	Population	million	40.412	42.262	44.244	46.284	48.338	50.31	52.239	54.147	56.052	57.896	59.659	61.358	63.018	64.681	66.388	68.154	69.991	71.893	73.854		SSP3	ARG	Argentina	Neotropics	GDP|PPP	billion US$2005/yr	580.427	722.739	875.897	1021.62	1153.87	1270.47	1374.99	1468.19	1561.54	1657.06	1758.35	1867.92	1985.3	2107.25	2230.87	2354.43	2479.79	2607.62
SSP4	ARG	Argentina	Neotropics	Population	million	40.412	41.924	43.233	44.271	45.018	45.57	45.891	45.946	45.734	45.298	44.649	43.813	42.8	41.632	40.352	38.996	37.593	36.158	34.708		SSP4	ARG	Argentina	Neotropics	GDP|PPP	billion US$2005/yr	580.427	716.973	859.903	1005.79	1157.43	1308.59	1449.04	1574.7	1696.62	1815.59	1929.64	2034.41	2126.18	2203.07	2272.09	2335.11	2394.71	2451.25
SSP5	ARG	Argentina	Neotropics	Population	million	40.412	41.83	42.93	43.722	44.252	44.611	44.756	44.657	44.322	43.797	43.103	42.277	41.318	40.229	39.014	37.575	35.961	34.226	32.414		SSP5	ARG	Argentina	Neotropics	GDP|PPP	billion US$2005/yr	580.427	715.355	861.04	1051.83	1300.41	1599.62	1910.41	2217.79	2519.48	2818.43	3115.02	3408.14	3688.78	3947.5	4196.29	4431.18	4650.81	4853.98
SSP1	BGD	Bangladesh	South Asia	Population	million	148.692	156.3	163.543	169.475	173.814	176.853	178.519	178.797	177.675	175.369	172.005	167.866	163.036	157.597	151.627	145.241	138.534	131.634	124.672		SSP1	BGD	Bangladesh	South Asia	GDP|PPP	billion US$2005/yr	221.297	299.557	422.378	596.861	840.967	1172.14	1590.47	2084.68	2636.73	3232.56	3854.01	4475.12	5077.04	5651.81	6181.94	6656.78	7074.77	7440.37
SSP2	BGD	Bangladesh	South Asia	Population	million	148.692	157.346	166.226	174.289	181.146	186.736	191.092	194.105	195.777	196.105	195.149	193.239	190.649	187.485	183.858	179.896	175.754	171.589	167.49		SSP2	BGD	Bangladesh	South Asia	GDP|PPP	billion US$2005/yr	221.297	301.561	424.974	576.478	750.712	946.445	1179.1	1448.13	1754.13	2101.2	2492.44	2925.63	3402.03	3923.21	4476.56	5058.33	5667.91	6308.26
SSP3	BGD	Bangladesh	South Asia	Population	million	148.692	158.266	168.989	179.919	190.251	199.416	207.6	215.035	221.609	227.158	231.585	235.243	238.605	241.805	245.085	248.588	252.437	256.731	261.496		SSP3	BGD	Bangladesh	South Asia	GDP|PPP	billion US$2005/yr	221.297	303.325	429.037	569.094	707.552	833.948	965.74	1100.23	1236.33	1377.87	1528.62	1688.64	1861.91	2051.3	2251.45	2462.87	2689.58	2936.54
SSP4	BGD	Bangladesh	South Asia	Population	million	148.692	156.393	163.885	169.986	174.36	177.329	178.799	178.691	177.054	174.044	169.807	164.642	158.655	152.023	144.943	137.612	130.215	122.918	115.847		SSP4	BGD	Bangladesh	South Asia	GDP|PPP	billion US$2005/yr	221.297	299.735	416.077	539.953	653.221	738.181	811.585	870.174	914.328	947.845	972.679	987.017	992.465	991.987	985.431	974.122	960.478	946.511
SSP5	BGD	Bangladesh	South Asia	Population	million	148.692	155.919	162.575	167.583	170.957	173.03	173.744	173.096	171.098	167.981	163.88	159.171	153.935	148.253	142.198	135.871	129.35	122.747	116.176		SSP5	BGD	Bangladesh	South Asia	GDP|PPP	billion US$2005/yr	221.297	298.827	422.673	616.648	917.807	1356.4	1920.86	2598.08	3366.51	4211.39	5113.05	6043.47	6980.3	7917.6	8836.33	9722.86	10574.8	11399
SSP1	BLZ	Belize	Neotropics	Population	million	0.312	0.336	0.356	0.37	0.38	0.387	0.391	0.392	0.39	0.386	0.38	0.372	0.364	0.356	0.346	0.336	0.324	0.31	0.295		SSP1	BLZ	Belize	Neotropics	GDP|PPP	billion US$2005/yr	2.061	2.266	2.592	3.141	3.903	4.861	5.977	7.218	8.521	9.869	11.223	12.574	13.881	15.116	16.32	17.463	18.516	19.481
SSP2	BLZ	Belize	Neotropics	Population	million	0.312	0.34	0.365	0.386	0.403	0.418	0.431	0.44	0.448	0.453	0.456	0.457	0.458	0.457	0.456	0.454	0.452	0.45	0.449		SSP2	BLZ	Belize	Neotropics	GDP|PPP	billion US$2005/yr	2.061	2.289	2.611	3.077	3.653	4.315	5.08	5.949	6.919	8	9.2	10.539	12.018	13.631	15.38	17.261	19.283	21.455
SSP3	BLZ	Belize	Neotropics	Population	million	0.312	0.342	0.375	0.408	0.441	0.472	0.502	0.533	0.563	0.592	0.62	0.648	0.675	0.702	0.73	0.759	0.788	0.818	0.85		SSP3	BLZ	Belize	Neotropics	GDP|PPP	billion US$2005/yr	2.061	2.306	2.642	3.077	3.566	4.083	4.652	5.277	5.95	6.679	7.461	8.319	9.273	10.319	11.449	12.654	13.951	15.362
SSP4	BLZ	Belize	Neotropics	Population	million	0.312	0.342	0.372	0.4	0.426	0.45	0.473	0.495	0.516	0.536	0.556	0.575	0.594	0.615	0.637	0.66	0.685	0.712	0.741		SSP4	BLZ	Belize	Neotropics	GDP|PPP	billion US$2005/yr	2.061	2.301	2.595	2.93	3.312	3.677	4.059	4.457	4.869	5.307	5.781	6.308	6.894	7.538	8.238	8.996	9.829	10.756
SSP5	BLZ	Belize	Neotropics	Population	million	0.312	0.336	0.353	0.362	0.365	0.366	0.363	0.357	0.348	0.337	0.325	0.312	0.3	0.288	0.276	0.264	0.252	0.24	0.228		SSP5	BLZ	Belize	Neotropics	GDP|PPP	billion US$2005/yr	2.061	2.261	2.574	3.138	3.989	5.121	6.434	7.884	9.398	10.96	12.552	14.185	15.797	17.376	19.013	20.667	22.332	24.057
SSP1	BEN	Benin	Mainland Africa	Population	million	8.85	10.042	11.251	12.428	13.527	14.584	15.565	16.435	17.185	17.817	18.337	18.748	19.043	19.217	19.269	19.203	19.028	18.751	18.376		SSP1	BEN	Benin	Mainland Africa	GDP|PPP	billion US$2005/yr	12.601	15.02	19.378	26.723	38.283	56.012	82.082	118.813	168.465	232.796	312.832	408.131	516.931	636.096	763.855	897.097	1032.76	1167.84
SSP2	BEN	Benin	Mainland Africa	Population	million	8.85	10.145	11.514	12.9	14.254	15.571	16.85	18.076	19.214	20.233	21.15	21.967	22.67	23.271	23.736	24.064	24.272	24.37	24.385		SSP2	BEN	Benin	Mainland Africa	GDP|PPP	billion US$2005/yr	12.601	15.174	19.318	25.282	33.205	43.426	57.238	75.681	99.895	131.145	170.893	220.483	281.109	353.445	438.376	536.573	648.647	774.866
SSP3	BEN	Benin	Mainland Africa	Population	million	8.85	10.2	11.632	13.118	14.673	16.219	17.736	19.233	20.683	22.075	23.382	24.604	25.737	26.782	27.747	28.574	29.337	29.999	30.586		SSP3	BEN	Benin	Mainland Africa	GDP|PPP	billion US$2005/yr	12.601	15.257	19.279	24.371	30.3	36.738	44.409	53.559	64.245	76.62	90.772	106.76	124.674	144.454	166.149	189.598	215.038	242.353
SSP4	BEN	Benin	Mainland Africa	Population	million	8.85	10.214	11.678	13.214	14.821	16.415	17.977	19.519	21.015	22.451	23.8	25.058	26.218	27.284	28.263	29.098	29.858	30.504	31.062		SSP4	BEN	Benin	Mainland Africa	GDP|PPP	billion US$2005/yr	12.601	15.278	19.321	24.285	29.873	35.352	41.444	48.246	55.653	63.653	72.182	81.156	90.56	100.292	110.351	120.628	131.301	142.361
SSP5	BEN	Benin	Mainland Africa	Population	million	8.85	10.051	11.282	12.491	13.623	14.713	15.726	16.631	17.413	18.074	18.621	19.053	19.366	19.552	19.612	19.549	19.373	19.091	18.71		SSP5	BEN	Benin	Mainland Africa	GDP|PPP	billion US$2005/yr	12.601	15.035	19.494	27.67	41.991	65.912	102.626	156.169	230.639	329.592	455.759	609.907	790.918	995.493	1222.19	1467.55	1727.82	1999.02
SSP1	BTN	Bhutan	South Asia	Population	million	0.726	0.792	0.856	0.915	0.967	1.015	1.058	1.094	1.122	1.142	1.154	1.156	1.148	1.13	1.104	1.071	1.033	0.991	0.944		SSP1	BTN	Bhutan	South Asia	GDP|PPP	billion US$2005/yr	3.47	5.645	9.745	14.778	21.123	28.792	37.479	46.937	56.626	66.24	75.636	84.54	92.511	99.32	104.872	109.138	112.318	114.53
SSP2	BTN	Bhutan	South Asia	Population	million	0.726	0.797	0.869	0.939	1.006	1.069	1.129	1.186	1.239	1.284	1.321	1.347	1.364	1.372	1.371	1.362	1.347	1.328	1.305		SSP2	BTN	Bhutan	South Asia	GDP|PPP	billion US$2005/yr	3.47	5.681	9.804	14.499	19.99	26.334	33.684	41.993	51.041	60.664	70.894	81.584	92.385	102.97	112.93	122.152	130.693	138.565
SSP3	BTN	Bhutan	South Asia	Population	million	0.726	0.797	0.87	0.941	1.011	1.078	1.146	1.215	1.285	1.352	1.415	1.473	1.528	1.581	1.633	1.684	1.734	1.783	1.83		SSP3	BTN	Bhutan	South Asia	GDP|PPP	billion US$2005/yr	3.47	5.681	9.7	13.736	17.833	21.934	26.213	30.605	34.97	39.281	43.739	48.378	53.105	57.848	62.434	66.89	71.317	75.748
SSP4	BTN	Bhutan	South Asia	Population	million	0.726	0.792	0.858	0.918	0.971	1.02	1.063	1.1	1.13	1.151	1.163	1.164	1.154	1.133	1.104	1.069	1.028	0.985	0.939		SSP4	BTN	Bhutan	South Asia	GDP|PPP	billion US$2005/yr	3.47	5.647	9.671	14.048	18.967	24.3	29.979	35.841	41.576	47.06	52.486	57.702	62.432	66.538	69.917	72.57	74.66	76.269
SSP5	BTN	Bhutan	South Asia	Population	million	0.726	0.795	0.866	0.935	0.998	1.056	1.109	1.156	1.194	1.223	1.243	1.25	1.246	1.231	1.205	1.171	1.13	1.085	1.034		SSP5	BTN	Bhutan	South Asia	GDP|PPP	billion US$2005/yr	3.47	5.668	9.959	15.729	23.578	33.642	45.549	59.091	73.73	89.102	105.035	121.103	136.623	151.105	164.209	175.884	186.28	195.443
SSP1	BOL	Bolivia	Neotropics	Population	million	9.93	10.555	11.072	11.504	11.835	12.084	12.245	12.314	12.297	12.21	12.057	11.867	11.642	11.38	11.081	10.749	10.39	10.012	9.625		SSP1	BOL	Bolivia	Neotropics	GDP|PPP	billion US$2005/yr	43.19	54.225	68.298	89.307	118.718	156.997	203.564	257.63	317.65	382.615	450.589	520.14	588.911	655.472	720.418	782.093	839.14	891.251
SSP2	BOL	Bolivia	Neotropics	Population	million	9.93	10.647	11.34	12.001	12.603	13.13	13.585	13.963	14.271	14.495	14.646	14.745	14.803	14.819	14.79	14.731	14.654	14.567	14.468		SSP2	BOL	Bolivia	Neotropics	GDP|PPP	billion US$2005/yr	43.19	54.698	69.511	89.569	113.995	142.494	176.448	216.479	262.786	315.515	374.464	439.964	511.757	589.783	673.652	762.418	855.439	952.624
SSP3	BOL	Bolivia	Neotropics	Population	million	9.93	10.787	11.784	12.873	13.998	15.106	16.211	17.313	18.434	19.528	20.569	21.597	22.608	23.595	24.59	25.581	26.595	27.61	28.64		SSP3	BOL	Bolivia	Neotropics	GDP|PPP	billion US$2005/yr	43.19	55.42	71.534	90.497	110.77	131.328	153.94	178.918	206.496	237.111	271.195	309.532	352.474	400.218	452.488	508.449	568.586	632.96
SSP4	BOL	Bolivia	Neotropics	Population	million	9.93	10.751	11.669	12.629	13.603	14.539	15.454	16.349	17.24	18.086	18.864	19.636	20.402	21.159	21.934	22.716	23.525	24.343	25.181		SSP4	BOL	Bolivia	Neotropics	GDP|PPP	billion US$2005/yr	43.19	55.236	71.133	90.481	113.806	140.891	173.438	212.412	258.825	313.815	378.283	454.076	542.829	645.775	763.35	895.503	1043.66	1208.87
SSP5	BOL	Bolivia	Neotropics	Population	million	9.93	10.522	10.965	11.276	11.474	11.583	11.599	11.52	11.358	11.13	10.842	10.539	10.224	9.897	9.559	9.211	8.858	8.507	8.165		SSP5	BOL	Bolivia	Neotropics	GDP|PPP	billion US$2005/yr	43.19	54.059	67.786	89.755	123.32	169.51	226.442	293.415	368.789	451.784	540.442	633.904	729.47	826.054	925.928	1027.46	1129.57	1232.47
SSP1	BWA	Botswana	Mainland Africa	Population	million	2.007	2.115	2.22	2.308	2.376	2.438	2.492	2.538	2.574	2.596	2.605	2.594	2.566	2.524	2.468	2.4	2.322	2.236	2.143		SSP1	BWA	Botswana	Mainland Africa	GDP|PPP	billion US$2005/yr	25.012	30.877	38.707	47.195	56.86	67.517	78.903	90.491	101.945	113.06	123.788	133.693	142.268	149.115	154.457	158.3	160.988	162.633
SSP2	BWA	Botswana	Mainland Africa	Population	million	2.007	2.13	2.242	2.34	2.428	2.511	2.589	2.663	2.736	2.805	2.872	2.923	2.954	2.964	2.957	2.931	2.89	2.834	2.762		SSP2	BWA	Botswana	Mainland Africa	GDP|PPP	billion US$2005/yr	25.012	31.094	38.869	46.623	54.411	62.146	70.468	79.284	88.597	98.459	109.026	119.835	130.565	140.889	150.776	160.073	168.651	176.248
SSP3	BWA	Botswana	Mainland Africa	Population	million	2.007	2.109	2.186	2.248	2.302	2.346	2.387	2.427	2.466	2.498	2.532	2.566	2.589	2.616	2.649	2.686	2.726	2.768	2.809		SSP3	BWA	Botswana	Mainland Africa	GDP|PPP	billion US$2005/yr	25.012	30.792	37.733	43.778	48.685	52.584	56.218	59.541	62.604	65.312	68.053	70.886	73.624	76.404	79.299	82.228	85.202	88.258
SSP4	BWA	Botswana	Mainland Africa	Population	million	2.007	2.106	2.181	2.233	2.264	2.279	2.282	2.272	2.254	2.23	2.201	2.161	2.108	2.044	1.971	1.891	1.805	1.715	1.619		SSP4	BWA	Botswana	Mainland Africa	GDP|PPP	billion US$2005/yr	25.012	30.748	37.819	44.648	51.436	57.773	64.002	69.924	75.501	80.777	85.854	90.516	94.591	97.964	100.81	103.048	104.695	105.757
SSP5	BWA	Botswana	Mainland Africa	Population	million	2.007	2.119	2.233	2.335	2.42	2.499	2.573	2.641	2.698	2.741	2.769	2.773	2.756	2.721	2.667	2.599	2.517	2.424	2.321		SSP5	BWA	Botswana	Mainland Africa	GDP|PPP	billion US$2005/yr	25.012	30.932	39.037	48.737	60.995	75.527	91.768	109.243	127.623	146.68	166.381	186.011	204.762	221.829	237.165	250.738	262.904	273.711
SSP1	BRA	Brazil	Neotropics	Population	million	194.946	202.295	208.26	212.851	215.84	217.569	217.973	217.119	214.893	211.428	206.803	201.168	194.68	187.439	179.584	171.168	161.79	151.778	141.412		SSP1	BRA	Brazil	Neotropics	GDP|PPP	billion US$2005/yr	1967.54	2303.63	2796.63	3352.74	3996.14	4746.48	5564.08	6401.21	7214.07	8003.39	8752.9	9417.13	9990.13	10500.3	10932.9	11279.2	11525.4	11679.8
SSP2	BRA	Brazil	Neotropics	Population	million	194.946	203.15	210.743	217.42	222.819	226.941	229.841	231.531	231.868	230.802	228.665	225.548	221.581	216.853	211.583	205.939	200.123	194.262	188.415		SSP2	BRA	Brazil	Neotropics	GDP|PPP	billion US$2005/yr	1967.54	2313.37	2814.73	3308.15	3776.17	4225.47	4687.93	5153.78	5613.1	6082.41	6559.79	7025.86	7488.78	7966.35	8436.35	8899.19	9362.07	9833.18
SSP3	BRA	Brazil	Neotropics	Population	million	194.946	203.994	213.252	222.22	230.452	237.514	243.654	249.061	253.654	257.249	259.958	262.026	263.731	265.243	266.806	268.584	270.692	273.259	276.286		SSP3	BRA	Brazil	Neotropics	GDP|PPP	billion US$2005/yr	1967.54	2322.98	2833.34	3275.81	3616.06	3857.54	4058.53	4216.96	4333.19	4433.3	4522.29	4593.82	4657.65	4724.3	4775.3	4809.9	4836.09	4859.77
SSP4	BRA	Brazil	Neotropics	Population	million	194.946	202.596	209.12	214.155	217.314	218.955	219.05	217.62	214.595	210.183	204.524	197.751	190.044	181.545	172.505	163.126	153.654	144.262	135.051		SSP4	BRA	Brazil	Neotropics	GDP|PPP	billion US$2005/yr	1967.54	2307.06	2790.7	3250.37	3693.67	4118.37	4542.88	4950.71	5332.21	5711.07	6085.49	6422.68	6724.72	7011.57	7268.89	7494.15	7698.96	7894.71
SSP5	BRA	Brazil	Neotropics	Population	million	194.946	202.206	207.991	212.308	215.02	216.479	216.625	215.528	213.077	209.404	204.589	198.804	192.205	184.894	177.009	168.601	159.272	149.348	139.102		SSP5	BRA	Brazil	Neotropics	GDP|PPP	billion US$2005/yr	1967.54	2302.62	2800.47	3425.07	4239	5262.76	6409.81	7628.86	8867.72	10129.9	11397.9	12610.9	13753	14862.1	15917.5	16903	17790.6	18583.6
SSP1	BRN	Brunei	Southeast Asia	Population	million	0.399	0.429	0.455	0.477	0.496	0.511	0.525	0.535	0.543	0.546	0.546	0.542	0.535	0.524	0.509	0.491	0.47	0.446	0.42		SSP1	BRN	Brunei	Southeast Asia	GDP|PPP	billion US$2005/yr	18.153	20.759	24.275	27.904	31.801	35.814	39.663	43.171	46.38	49.243	51.776	53.833	55.262	56.069	56.479	56.55	56.326	55.777
SSP2	BRN	Brunei	Southeast Asia	Population	million	0.399	0.433	0.466	0.498	0.527	0.555	0.58	0.604	0.627	0.647	0.664	0.676	0.683	0.685	0.683	0.678	0.671	0.66	0.648		SSP2	BRN	Brunei	Southeast Asia	GDP|PPP	billion US$2005/yr	18.153	20.964	24.759	28.476	32.244	36.206	40.311	44.543	49.007	53.68	58.544	63.259	67.612	71.525	75.031	78.062	80.616	82.735
SSP3	BRN	Brunei	Southeast Asia	Population	million	0.399	0.431	0.462	0.49	0.517	0.543	0.568	0.591	0.612	0.633	0.652	0.669	0.685	0.7	0.715	0.73	0.745	0.76	0.775		SSP3	BRN	Brunei	Southeast Asia	GDP|PPP	billion US$2005/yr	18.153	20.882	24.403	27.334	29.785	32.053	34.165	36.136	38.153	40.27	42.511	44.766	46.901	48.933	50.903	52.811	54.672	56.459
SSP4	BRN	Brunei	Southeast Asia	Population	million	0.399	0.429	0.455	0.478	0.496	0.512	0.525	0.535	0.542	0.545	0.545	0.541	0.533	0.522	0.508	0.492	0.474	0.456	0.436		SSP4	BRN	Brunei	Southeast Asia	GDP|PPP	billion US$2005/yr	18.153	20.749	24.211	27.542	30.856	33.961	36.688	39.043	41.213	43.248	45.169	46.819	48.072	48.945	49.605	50.061	50.356	50.498
SSP5	BRN	Brunei	Southeast Asia	Population	million	0.399	0.429	0.457	0.482	0.503	0.521	0.537	0.55	0.56	0.566	0.568	0.567	0.561	0.551	0.537	0.519	0.498	0.473	0.445		SSP5	BRN	Brunei	Southeast Asia	GDP|PPP	billion US$2005/yr	18.153	20.783	24.453	28.749	33.717	39.176	44.736	50.288	55.842	61.304	66.67	71.709	76.164	79.946	83.25	86.185	88.668	90.629
SSP1	BFA	Burkina Faso	Mainland Africa	Population	million	16.469	18.651	20.862	23.071	25.182	27.272	29.234	30.999	32.528	33.83	34.907	35.806	36.523	37.052	37.4	37.578	37.592	37.447	37.144		SSP1	BFA	Burkina Faso	Mainland Africa	GDP|PPP	billion US$2005/yr	18.709	24.921	34.144	48.982	71.961	106.496	155.782	223.38	312.921	426.941	566.422	730.94	918.28	1124.34	1347.2	1582.88	1826.26	2072.62
SSP2	BFA	Burkina Faso	Mainland Africa	Population	million	16.469	18.924	21.567	24.375	27.291	30.23	33.135	35.925	38.602	41.115	43.42	45.519	47.468	49.22	50.807	52.215	53.431	54.47	55.325		SSP2	BFA	Burkina Faso	Mainland Africa	GDP|PPP	billion US$2005/yr	18.709	25.287	34.931	48.346	66.267	89.67	121.424	164.2	220.999	295.065	389.477	507.973	654.037	830.084	1038.1	1279.56	1554.49	1863.08
SSP3	BFA	Burkina Faso	Mainland Africa	Population	million	16.469	19.157	22.244	25.706	29.585	33.707	38.011	42.474	47.054	51.637	56.105	60.462	64.725	68.833	72.794	76.579	80.157	83.572	86.731		SSP3	BFA	Burkina Faso	Mainland Africa	GDP|PPP	billion US$2005/yr	18.709	25.597	35.536	47.599	61.498	76.863	95.245	117.438	143.99	175.427	212.042	254.389	302.952	357.525	417.741	483.243	553.721	629.076
SSP4	BFA	Burkina Faso	Mainland Africa	Population	million	16.469	19.133	22.162	25.515	29.254	33.206	37.314	41.556	45.887	50.191	54.358	58.427	62.426	66.299	70.056	73.667	77.105	80.409	83.493		SSP4	BFA	Burkina Faso	Mainland Africa	GDP|PPP	billion US$2005/yr	18.709	25.566	35.362	46.849	59.462	72.169	86.54	103.056	121.9	143.212	166.938	193.333	222.551	254.272	288.156	324.016	361.787	401.637
SSP5	BFA	Burkina Faso	Mainland Africa	Population	million	16.469	18.623	20.764	22.85	24.811	26.726	28.484	30.019	31.293	32.32	33.108	33.74	34.217	34.543	34.727	34.785	34.724	34.549	34.266		SSP5	BFA	Burkina Faso	Mainland Africa	GDP|PPP	billion US$2005/yr	18.709	24.884	34.129	50.138	77.421	121.423	186.044	276.461	398.143	555.393	750.684	985.681	1259.64	1569.57	1916.41	2297.68	2709.45	3148.04
SSP1	BDI	Burundi	Mainland Africa	Population	million	8.383	9.572	10.724	11.777	12.683	13.515	14.293	14.987	15.572	16.035	16.372	16.579	16.665	16.633	16.493	16.255	15.935	15.545	15.088		SSP1	BDI	Burundi	Mainland Africa	GDP|PPP	billion US$2005/yr	4.389	5.719	7.98	11.816	18.515	29.747	47.267	72.754	107.592	153.043	210.398	279.757	359.927	447.73	540.111	634.341	728.929	822.664
SSP2	BDI	Burundi	Mainland Africa	Population	million	8.383	9.642	10.892	12.037	13.086	14.086	15.056	15.974	16.81	17.531	18.126	18.579	18.938	19.188	19.324	19.353	19.289	19.149	18.918		SSP2	BDI	Burundi	Mainland Africa	GDP|PPP	billion US$2005/yr	4.389	5.761	8.01	11.189	15.805	22.228	31.322	43.744	60.196	81.673	109.477	144.579	187.89	239.53	299.3	367.433	444.559	530.695
SSP3	BDI	Burundi	Mainland Africa	Population	million	8.383	9.627	10.826	11.916	12.93	13.885	14.847	15.817	16.742	17.569	18.295	18.93	19.492	20.033	20.5	20.871	21.149	21.339	21.461		SSP3	BDI	Burundi	Mainland Africa	GDP|PPP	billion US$2005/yr	4.389	5.752	7.89	10.354	13.361	16.706	20.793	25.616	31.144	37.53	45.023	53.76	63.748	74.944	87.09	100.117	114.172	129.224
SSP4	BDI	Burundi	Mainland Africa	Population	million	8.383	9.692	11.015	12.294	13.505	14.656	15.808	16.971	18.099	19.138	20.078	20.899	21.618	22.295	22.878	23.338	23.673	23.882	23.982		SSP4	BDI	Burundi	Mainland Africa	GDP|PPP	billion US$2005/yr	4.389	5.791	8.006	10.527	13.436	16.339	19.655	23.329	27.285	31.593	36.369	41.583	47.182	53.086	59.104	65.183	71.408	77.785
SSP5	BDI	Burundi	Mainland Africa	Population	million	8.383	9.634	10.903	12.131	13.213	14.222	15.185	16.063	16.822	17.439	17.91	18.223	18.386	18.403	18.282	18.038	17.69	17.254	16.738		SSP5	BDI	Burundi	Mainland Africa	GDP|PPP	billion US$2005/yr	4.389	5.756	8.176	12.765	21.728	38.13	64.933	105.418	162.479	239.004	338.241	461.639	608.61	775.194	956.623	1149.96	1353.35	1565.26
SSP1	KHM	Cambodia	Southeast Asia	Population	million	14.138	14.769	15.329	15.718	15.931	16.035	16.032	15.935	15.739	15.456	15.095	14.689	14.237	13.738	13.196	12.63	12.059	11.497	10.95		SSP1	KHM	Cambodia	Southeast Asia	GDP|PPP	billion US$2005/yr	27.826	38.277	54.263	74.976	102.551	138.222	181.993	234.146	291.704	354.218	418.362	485.054	552.742	618.426	680.881	738.848	793.015	844.215
SSP2	KHM	Cambodia	Southeast Asia	Population	million	14.138	14.893	15.607	16.192	16.66	17.02	17.289	17.497	17.615	17.627	17.54	17.386	17.197	16.974	16.719	16.458	16.192	15.947	15.72		SSP2	KHM	Cambodia	Southeast Asia	GDP|PPP	billion US$2005/yr	27.826	38.597	54.689	72.733	92.85	114.719	140.369	170.624	204.173	242.069	283.528	330.493	383.354	441.305	503.856	571.694	645.992	727.606
SSP3	KHM	Cambodia	Southeast Asia	Population	million	14.138	14.965	15.941	16.925	17.843	18.62	19.352	20.073	20.785	21.445	22.003	22.473	22.92	23.367	23.864	24.379	24.931	25.502	26.117		SSP3	KHM	Cambodia	Southeast Asia	GDP|PPP	billion US$2005/yr	27.826	38.784	55.373	72.272	88.837	104.118	120.384	138.326	156.469	175.583	194.882	215.879	238.958	263.7	289.958	317.676	347.728	380.695
SSP4	KHM	Cambodia	Southeast Asia	Population	million	14.138	14.759	15.314	15.7	15.916	16.003	15.983	15.869	15.654	15.351	14.959	14.503	13.996	13.45	12.885	12.325	11.779	11.255	10.754		SSP4	KHM	Cambodia	Southeast Asia	GDP|PPP	billion US$2005/yr	27.826	38.251	53.193	67.42	80.22	89.69	98.186	106.172	112.485	117.912	121.87	125.262	128.081	130.039	131.302	132.013	132.568	133.246
SSP5	KHM	Cambodia	Southeast Asia	Population	million	14.138	14.712	15.146	15.33	15.338	15.241	15.039	14.738	14.344	13.879	13.356	12.822	12.275	11.716	11.15	10.592	10.054	9.547	9.076		SSP5	KHM	Cambodia	Southeast Asia	GDP|PPP	billion US$2005/yr	27.826	38.129	54.078	76.683	109.745	154.758	210.093	275.684	348.056	426.983	508.744	595.293	685.158	775.303	865.804	955.178	1044.88	1136.92
SSP1	CMR	Cameroon	Mainland Africa	Population	million	19.599	21.424	23.15	24.749	26.175	27.485	28.626	29.552	30.274	30.808	31.168	31.362	31.38	31.223	30.896	30.417	29.797	29.05	28.192		SSP1	CMR	Cameroon	Mainland Africa	GDP|PPP	billion US$2005/yr	40.336	50.073	65.024	88.458	124.026	175.188	243.868	331.538	438.814	566.081	712.204	874.014	1045.07	1218.95	1395.04	1569.15	1737.05	1895.39
SSP2	CMR	Cameroon	Mainland Africa	Population	million	19.599	21.659	23.654	25.516	27.315	29.037	30.621	31.978	33.156	34.164	34.971	35.597	36.069	36.409	36.583	36.602	36.47	36.252	35.925		SSP2	CMR	Cameroon	Mainland Africa	GDP|PPP	billion US$2005/yr	40.336	50.623	65.952	87.462	115.837	151.332	196.115	251.22	318.234	398.882	494.297	605.025	730.477	870.231	1024.75	1193.71	1376.36	1571.04
SSP3	CMR	Cameroon	Mainland Africa	Population	million	19.599	21.837	24.176	26.494	28.849	31.123	33.319	35.402	37.387	39.201	40.85	42.337	43.763	45.034	46.217	47.293	48.275	49.219	50.031		SSP3	CMR	Cameroon	Mainland Africa	GDP|PPP	billion US$2005/yr	40.336	51.038	66.819	85.975	107.899	131.442	158.263	188.24	221.564	258.638	299.635	344.534	393.264	445.008	499.589	556.805	616.837	680.006
SSP4	CMR	Cameroon	Mainland Africa	Population	million	19.599	21.841	24.193	26.524	28.885	31.154	33.339	35.407	37.374	39.164	40.782	42.234	43.623	44.853	45.992	47.019	47.944	48.822	49.56		SSP4	CMR	Cameroon	Mainland Africa	GDP|PPP	billion US$2005/yr	40.336	51.048	66.697	84.735	104.808	124.708	146.464	169.937	195.309	222.784	252.282	283.503	316.389	350.227	384.882	420.429	457.097	495.332
SSP5	CMR	Cameroon	Mainland Africa	Population	million	19.599	21.42	23.136	24.719	26.126	27.416	28.536	29.44	30.139	30.651	30.989	31.165	31.17	31.003	30.67	30.189	29.57	28.828	27.977		SSP5	CMR	Cameroon	Mainland Africa	GDP|PPP	billion US$2005/yr	40.336	50.063	65.158	90.797	133.481	199.368	290.844	411.21	562.779	747.921	967.329	1218.9	1495.46	1789.6	2102.1	2428.15	2762.3	3099.76
SSP1	CAF	Central African Republic	Mainland Africa	Population	million	4.401	4.768	5.137	5.492	5.804	6.085	6.323	6.507	6.646	6.742	6.796	6.812	6.788	6.725	6.626	6.497	6.341	6.161	5.963		SSP1	CAF	Central African Republic	Mainland Africa	GDP|PPP	billion US$2005/yr	3.114	3.811	4.983	6.847	9.86	14.601	21.613	31.519	44.885	62.134	83.485	108.793	137.667	169.452	203.713	239.504	275.889	312.175
SSP2	CAF	Central African Republic	Mainland Africa	Population	million	4.401	4.818	5.259	5.686	6.097	6.479	6.834	7.147	7.414	7.642	7.825	7.96	8.052	8.099	8.111	8.092	8.042	7.973	7.886		SSP2	CAF	Central African Republic	Mainland Africa	GDP|PPP	billion US$2005/yr	3.114	3.851	5.052	6.696	8.856	11.633	15.355	20.284	26.702	34.927	45.283	58.059	73.573	92.102	113.899	139.193	168.114	200.814
SSP3	CAF	Central African Republic	Mainland Africa	Population	million	4.401	4.842	5.329	5.825	6.319	6.785	7.232	7.663	8.074	8.448	8.78	9.076	9.339	9.575	9.775	9.959	10.11	10.234	10.333		SSP3	CAF	Central African Republic	Mainland Africa	GDP|PPP	billion US$2005/yr	3.114	3.869	5.063	6.412	7.832	9.273	10.948	12.906	15.184	17.807	20.81	24.231	28.118	32.479	37.261	42.48	48.126	54.221
SSP4	CAF	Central African Republic	Mainland Africa	Population	million	4.401	4.843	5.332	5.831	6.326	6.795	7.242	7.674	8.085	8.459	8.791	9.085	9.347	9.581	9.779	9.96	10.108	10.227	10.321		SSP4	CAF	Central African Republic	Mainland Africa	GDP|PPP	billion US$2005/yr	3.114	3.87	5.056	6.331	7.579	8.653	9.788	11.004	12.312	13.704	15.185	16.758	18.437	20.211	22.039	23.933	25.897	27.957
SSP5	CAF	Central African Republic	Mainland Africa	Population	million	4.401	4.769	5.14	5.497	5.812	6.095	6.336	6.523	6.665	6.763	6.819	6.836	6.813	6.751	6.653	6.524	6.367	6.187	5.988		SSP5	CAF	Central African Republic	Mainland Africa	GDP|PPP	billion US$2005/yr	3.114	3.811	5.007	7.123	10.971	17.604	27.84	42.767	63.406	90.602	124.943	166.524	215.108	270.05	331.056	396.997	466.675	539.204
SSP1	TCD	Chad	Mainland Africa	Population	million	11.227	12.676	14.191	15.725	17.169	18.562	19.83	20.948	21.907	22.717	23.385	23.932	24.355	24.654	24.831	24.89	24.832	24.659	24.38		SSP1	TCD	Chad	Mainland Africa	GDP|PPP	billion US$2005/yr	15.011	18.091	22.093	30.506	44.595	66.552	98.936	143.952	204.119	281.298	376.465	489.512	619.064	762.869	918.718	1083.25	1252.94	1424.93
SSP2	TCD	Chad	Mainland Africa	Population	million	11.227	12.811	14.532	16.369	18.255	20.125	21.912	23.619	25.238	26.758	28.118	29.317	30.396	31.378	32.206	32.917	33.481	33.901	34.197		SSP2	TCD	Chad	Mainland Africa	GDP|PPP	billion US$2005/yr	15.011	18.284	21.949	28.606	38.514	52.216	71.418	97.472	132.359	177.992	236.385	309.778	400.613	510.77	641.148	792.675	965.735	1160.98
SSP3	TCD	Chad	Mainland Africa	Population	million	11.227	12.911	14.782	16.85	19.092	21.384	23.683	25.99	28.271	30.469	32.554	34.52	36.369	38.115	39.745	41.249	42.609	43.793	44.904		SSP3	TCD	Chad	Mainland Africa	GDP|PPP	billion US$2005/yr	15.011	18.426	22.116	27.99	35.807	45.276	57.139	71.537	88.712	108.844	131.967	158.2	187.546	219.949	254.995	292.513	332.195	373.662
SSP4	TCD	Chad	Mainland Africa	Population	million	11.227	12.893	14.722	16.717	18.87	21.061	23.251	25.437	27.589	29.65	31.593	33.43	35.165	36.811	38.356	39.786	41.088	42.229	43.307		SSP4	TCD	Chad	Mainland Africa	GDP|PPP	billion US$2005/yr	15.011	18.401	22.013	27.671	35.079	43.603	53.958	66.154	80.285	96.392	114.394	134.335	156.162	179.786	204.872	231.34	259.045	287.828
SSP5	TCD	Chad	Mainland Africa	Population	million	11.227	12.66	14.135	15.602	16.966	18.27	19.436	20.439	21.273	21.951	22.483	22.908	23.224	23.434	23.542	23.554	23.472	23.296	23.034		SSP5	TCD	Chad	Mainland Africa	GDP|PPP	billion US$2005/yr	15.011	18.068	22.079	31.131	47.557	74.818	116.232	175.257	255.915	361.645	494.977	657.561	849.398	1069.43	1317.04	1589.57	1883.95	2197.74
SSP1	CHN	China	Southeast Asia	Population	million	1341.34	1360.5	1371.17	1370.82	1359.51	1338.97	1308.94	1270.38	1224.52	1173.04	1117.3	1058.79	999.265	939.871	880.436	820.791	761.794	703.041	643.987		SSP1	CHN	China	Southeast Asia	GDP|PPP	billion US$2005/yr	9121.35	13852.4	20548.5	28870.3	38292.5	47784.2	56255.4	63353.9	68441.8	71441.8	73146	73727.1	73350.5	72049.6	70406.7	68308.3	65970.1	63440.4
SSP2	CHN	China	Southeast Asia	Population	million	1341.34	1363.42	1379.23	1385.14	1380.65	1365.28	1339.59	1305.12	1263.14	1215.4	1163.79	1110.44	1057.15	1004.28	951.828	900.636	852.319	807.864	767.275		SSP2	CHN	China	Southeast Asia	GDP|PPP	billion US$2005/yr	9121.35	13882.1	20376.8	27245.2	33582.3	38906.9	43613	47745.9	50967.5	53257.4	55132.5	56609	57738.5	58448.3	58955.6	59167	59231.8	59221.4
SSP3	CHN	China	Southeast Asia	Population	million	1341.34	1365.62	1385.69	1397.23	1398.88	1388.84	1368.55	1340.65	1307.46	1270.22	1231.33	1193.3	1157.45	1123.98	1094.03	1069.14	1050.27	1036.9	1027.98		SSP3	CHN	China	Southeast Asia	GDP|PPP	billion US$2005/yr	9121.35	13904.5	20318.3	26409.5	31120.2	34103.1	36249.7	37748.4	38452.5	38528.7	38486.9	38367.3	38207.7	37964.3	37725	37439.2	37204.8	37051.8
SSP4	CHN	China	Southeast Asia	Population	million	1341.34	1359.65	1368.81	1365.65	1350	1323.37	1285.92	1238.88	1183.48	1121.78	1055.86	988.032	920.286	853.198	787	722.714	662.069	606.153	555.116		SSP4	CHN	China	Southeast Asia	GDP|PPP	billion US$2005/yr	9121.35	13843.8	20259.9	27080.1	33580.3	39109.6	43862.4	47805.4	50574.3	52173.5	53198.1	53598.2	53424.5	52645.7	51638.1	50322.5	48888.4	47421
SSP5	CHN	China	Southeast Asia	Population	million	1341.34	1360.36	1370.95	1370.53	1359.19	1338.66	1308.69	1270.24	1224.52	1173.18	1117.59	1059.19	999.737	940.394	880.994	821.37	762.385	703.63	644.558		SSP5	CHN	China	Southeast Asia	GDP|PPP	billion US$2005/yr	9121.35	13850.9	20772.4	30489	42651.7	55602.5	67337.1	77429	85164.6	90540.3	94578.5	97442.4	99250.6	99965.8	100307	100055	99454	98525.1
SSP1	COL	Colombia	Neotropics	Population	million	46.295	49.087	51.481	53.502	55.123	56.43	57.37	57.922	58.09	57.932	57.473	56.752	55.786	54.593	53.185	51.553	49.582	47.341	44.903		SSP1	COL	Colombia	Neotropics	GDP|PPP	billion US$2005/yr	392.55	491.259	599.464	712.581	871.298	1072.84	1304.33	1554.12	1813.79	2078.49	2342.19	2599.43	2841.6	3061.68	3265.46	3447.53	3600.19	3721.15
SSP2	COL	Colombia	Neotropics	Population	million	46.295	49.332	52.233	54.915	57.328	59.422	61.225	62.735	63.9	64.733	65.297	65.565	65.588	65.372	64.912	64.23	63.408	62.472	61.436		SSP2	COL	Colombia	Neotropics	GDP|PPP	billion US$2005/yr	392.55	493.714	605.146	707.202	829.777	967.583	1123.59	1295.19	1482.47	1685.71	1904.21	2138.34	2385.88	2643.01	2909.49	3181.16	3455.24	3730.2
SSP3	COL	Colombia	Neotropics	Population	million	46.295	49.642	53.123	56.614	60.051	63.277	66.346	69.304	72.164	74.865	77.408	79.815	82.097	84.273	86.361	88.403	90.438	92.491	94.553		SSP3	COL	Colombia	Neotropics	GDP|PPP	billion US$2005/yr	392.55	496.817	612.902	706.791	801.137	888.441	978.445	1069.21	1162.19	1260.49	1365.88	1480.8	1605.79	1740.5	1883.58	2033.29	2190.82	2356.45
SSP4	COL	Colombia	Neotropics	Population	million	46.295	49.199	51.852	54.132	55.96	57.427	58.486	59.119	59.318	59.145	58.628	57.807	56.698	55.323	53.712	51.911	49.97	47.936	45.843		SSP4	COL	Colombia	Neotropics	GDP|PPP	billion US$2005/yr	392.55	492.377	600.576	694.683	807.242	930.891	1065.69	1206.45	1353	1506.16	1664.59	1824.58	1981.83	2132.41	2277.79	2414.58	2542.88	2662.79
SSP5	COL	Colombia	Neotropics	Population	million	46.295	49.065	51.411	53.356	54.898	56.122	56.981	57.451	57.54	57.306	56.773	55.99	54.974	53.744	52.312	50.669	48.701	46.476	44.068		SSP5	COL	Colombia	Neotropics	GDP|PPP	billion US$2005/yr	392.55	491.036	600.653	730.201	927.214	1192.29	1503.98	1850.93	2224.53	2620.95	3034.72	3460.12	3885.63	4302.2	4718.32	5126.24	5513.36	5873.84
SSP1	COG	Congo	Mainland Africa	Population	million	4.043	4.515	4.973	5.413	5.822	6.209	6.559	6.859	7.108	7.309	7.465	7.571	7.627	7.63	7.585	7.494	7.36	7.187	6.977		SSP1	COG	Congo	Mainland Africa	GDP|PPP	billion US$2005/yr	15.396	22.455	30.143	41.757	57.555	78.402	104.378	135.388	171.163	211.247	254.827	300.218	345.604	389.452	432.079	472.376	509.438	542.589
SSP2	COG	Congo	Mainland Africa	Population	million	4.043	4.561	5.077	5.58	6.08	6.571	7.032	7.446	7.823	8.161	8.454	8.7	8.902	9.063	9.172	9.231	9.242	9.216	9.153		SSP2	COG	Congo	Mainland Africa	GDP|PPP	billion US$2005/yr	15.396	22.683	30.3	40.66	53.2	68.004	85.623	106.258	130.342	158.227	190.062	225.514	264.357	306.32	351.353	399.105	449.147	500.69
SSP3	COG	Congo	Mainland Africa	Population	million	4.043	4.582	5.141	5.705	6.287	6.863	7.43	7.99	8.538	9.069	9.58	10.058	10.523	10.954	11.363	11.736	12.075	12.383	12.665		SSP3	COG	Congo	Mainland Africa	GDP|PPP	billion US$2005/yr	15.396	22.786	30.27	39.32	49.145	59.442	70.808	83.269	96.924	111.845	128.04	145.31	163.692	182.839	202.64	222.89	243.57	264.625
SSP4	COG	Congo	Mainland Africa	Population	million	4.043	4.593	5.178	5.781	6.404	7.017	7.62	8.214	8.796	9.361	9.902	10.404	10.886	11.328	11.74	12.108	12.434	12.717	12.964		SSP4	COG	Congo	Mainland Africa	GDP|PPP	billion US$2005/yr	15.396	22.842	30.407	39.248	48.806	58.362	68.695	79.862	91.994	105.147	119.304	134.18	149.82	165.893	182.289	198.837	215.529	232.372
SSP5	COG	Congo	Mainland Africa	Population	million	4.043	4.525	5.003	5.475	5.916	6.336	6.719	7.053	7.334	7.566	7.749	7.876	7.946	7.958	7.916	7.823	7.683	7.5	7.278		SSP5	COG	Congo	Mainland Africa	GDP|PPP	billion US$2005/yr	15.396	22.503	30.415	43.244	62.333	89.334	124.366	167.8	219.783	280.253	348.71	423.274	501.644	581.676	663.67	746.091	827.433	906.445
SSP1	COD	Congo DR	Mainland Africa	Population	million	65.966	74.762	83.883	93.089	101.704	109.917	117.504	124.26	130.041	134.982	139.094	142.401	144.87	146.49	147.288	147.313	146.595	145.174	143.116		SSP1	COD	Congo DR	Mainland Africa	GDP|PPP	billion US$2005/yr	20.876	29.356	44.117	76.517	136.034	237.933	398.47	636.284	966.031	1399.53	1944.8	2601.05	3358.77	4201.62	5110.63	6062.65	7033.32	8003.54
SSP2	COD	Congo DR	Mainland Africa	Population	million	65.966	75.413	85.771	96.614	107.35	117.678	127.427	136.789	145.719	153.864	160.929	167.188	172.54	177.04	180.711	183.406	185.387	186.604	187.015		SSP2	COD	Congo DR	Mainland Africa	GDP|PPP	billion US$2005/yr	20.876	29.611	44.539	73.21	116.725	177.572	263.901	384.52	547.687	762.241	1037.64	1383.77	1810.73	2325.04	2929.01	3620.53	4401.13	5270.34
SSP3	COD	Congo DR	Mainland Africa	Population	million	65.966	76.471	88.115	100.438	113.384	126.123	138.748	151.175	163.27	174.632	185.095	194.844	203.883	212.23	219.858	226.769	232.949	238.453	243.26		SSP3	COD	Congo DR	Mainland Africa	GDP|PPP	billion US$2005/yr	20.876	30.027	45.221	71.533	106.192	146.761	196.864	258.639	332.91	420.677	523.064	641.486	777.226	930.554	1100.36	1286.31	1488.86	1708.16
SSP4	COD	Congo DR	Mainland Africa	Population	million	65.966	76.455	88.056	100.301	113.113	125.652	138.015	150.124	161.845	172.787	182.783	192.032	200.541	208.33	215.365	221.644	227.148	231.932	235.976		SSP4	COD	Congo DR	Mainland Africa	GDP|PPP	billion US$2005/yr	20.876	30.02	45.037	69.929	101.024	133.605	170.664	213.108	260.575	312.775	369.483	430.652	496.41	566.292	639.273	715.337	794.91	878.563
SSP5	COD	Congo DR	Mainland Africa	Population	million	65.966	74.754	83.853	93.016	101.579	109.729	117.241	123.911	129.597	134.438	138.446	141.659	144.048	145.604	146.355	146.35	145.618	144.2	142.159		SSP5	COD	Congo DR	Mainland Africa	GDP|PPP	billion US$2005/yr	20.876	29.352	44.445	80.661	154.943	294.027	522.261	869.162	1359.73	2016.43	2858.43	3894.02	5119.51	6522.42	8086.73	9788.56	11600.2	13499.8
SSP1	CRI	Costa Rica	Neotropics	Population	million	4.659	4.972	5.251	5.494	5.7	5.877	6.019	6.119	6.176	6.195	6.181	6.126	6.035	5.907	5.728	5.5	5.234	4.93	4.593		SSP1	CRI	Costa Rica	Neotropics	GDP|PPP	billion US$2005/yr	48.697	60.302	74.678	91.936	112.362	136.335	162.364	188.846	214.092	237.897	260.789	281.909	300.49	316.453	329.965	340.555	348.129	352.46
SSP2	CRI	Costa Rica	Neotropics	Population	million	4.659	5.001	5.326	5.63	5.911	6.162	6.387	6.577	6.736	6.865	6.965	7.023	7.038	7.01	6.949	6.856	6.739	6.604	6.455		SSP2	CRI	Costa Rica	Neotropics	GDP|PPP	billion US$2005/yr	48.697	60.654	75.296	90.948	107.08	124.166	142.716	162.239	182.401	203.413	226.071	249.886	274.537	299.73	324.818	349.411	373.207	396.067
SSP3	CRI	Costa Rica	Neotropics	Population	million	4.659	5.009	5.362	5.694	6.01	6.3	6.574	6.837	7.093	7.339	7.576	7.796	8	8.194	8.385	8.579	8.78	8.988	9.199		SSP3	CRI	Costa Rica	Neotropics	GDP|PPP	billion US$2005/yr	48.697	60.754	75.357	88.885	100.558	111.005	121.29	131.124	140.562	149.903	160.037	170.991	182.873	195.626	208.629	221.796	235.44	249.735
SSP4	CRI	Costa Rica	Neotropics	Population	million	4.659	4.989	5.301	5.575	5.804	6	6.158	6.275	6.35	6.386	6.387	6.341	6.251	6.118	5.947	5.747	5.525	5.291	5.048		SSP4	CRI	Costa Rica	Neotropics	GDP|PPP	billion US$2005/yr	48.697	60.509	74.798	89.219	103.93	118.914	134.207	149.027	163.181	176.772	190.541	203.78	216.084	227.317	237.234	245.604	252.871	259.237
SSP5	CRI	Costa Rica	Neotropics	Population	million	4.659	4.985	5.291	5.575	5.822	6.043	6.231	6.375	6.474	6.531	6.55	6.521	6.447	6.331	6.156	5.927	5.653	5.334	4.976		SSP5	CRI	Costa Rica	Neotropics	GDP|PPP	billion US$2005/yr	48.697	60.463	75.499	95.563	122.088	155.585	193.578	234.295	275.66	317.313	359.883	402.023	442.385	480.421	516.218	549.046	578.443	603.583
SSP1	CIV	Cote d´Ivore	Mainland Africa	Population	million	19.738	21.216	22.513	23.689	24.652	25.49	26.16	26.637	26.936	27.087	27.104	27.042	26.886	26.626	26.261	25.801	25.249	24.615	23.912		SSP1	CIV	Cote d´Ivore	Mainland Africa	GDP|PPP	billion US$2005/yr	33.443	41.008	59.253	94.175	149.694	229.08	332.45	458.868	604.593	767.184	942.174	1124.89	1308.75	1488.79	1665.31	1835.02	1993.68	2138.84
SSP2	CIV	Cote d´Ivore	Mainland Africa	Population	million	19.738	21.463	23.152	24.71	26.179	27.548	28.757	29.772	30.619	31.283	31.801	32.237	32.563	32.788	32.912	32.935	32.904	32.797	32.655		SSP2	CIV	Cote d´Ivore	Mainland Africa	GDP|PPP	billion US$2005/yr	33.443	41.484	60.178	92.286	137.605	195.787	268.618	357.523	462.108	583.435	721.027	874.793	1043.69	1226.74	1423.44	1633.04	1853.95	2083.17
SSP3	CIV	Cote d´Ivore	Mainland Africa	Population	million	19.738	21.79	24.164	26.709	29.338	31.914	34.467	36.997	39.491	41.854	44.056	46.161	48.133	50.012	51.841	53.56	55.182	56.717	58.171		SSP3	CIV	Cote d´Ivore	Mainland Africa	GDP|PPP	billion US$2005/yr	33.443	42.116	61.758	91.348	127.518	167.284	212.184	262.119	315.968	374.076	436.865	505.017	578.033	655.674	736.917	819.887	904.87	991.526
SSP4	CIV	Cote d´Ivore	Mainland Africa	Population	million	19.738	21.725	23.955	26.249	28.585	30.835	33.039	35.197	37.295	39.242	41.016	42.731	44.362	45.95	47.528	49.035	50.482	51.877	53.227		SSP4	CIV	Cote d´Ivore	Mainland Africa	GDP|PPP	billion US$2005/yr	33.443	41.991	61.047	88.308	120.078	152.268	186.981	224.308	263.415	304.474	347.458	392.783	440.262	489.683	540.314	591.542	643.769	697.176
SSP5	CIV	Cote d´Ivore	Mainland Africa	Population	million	19.738	21.145	22.28	23.188	23.855	24.375	24.703	24.823	24.76	24.552	24.221	23.863	23.468	23.026	22.537	22.009	21.445	20.851	20.237		SSP5	CIV	Cote d´Ivore	Mainland Africa	GDP|PPP	billion US$2005/yr	33.443	40.87	59.013	96.092	159.201	253.582	377.198	528.871	704.742	903.389	1121.09	1355.14	1598.72	1848.2	2108.35	2376.56	2649.47	2925.33
SSP1	DJI	Djibouti	Mainland Africa	Population	million	0.889	0.961	1.033	1.097	1.149	1.195	1.235	1.266	1.289	1.303	1.309	1.307	1.298	1.282	1.259	1.23	1.197	1.161	1.121		SSP1	DJI	Djibouti	Mainland Africa	GDP|PPP	billion US$2005/yr	1.884	2.364	3.164	4.376	6.163	8.603	11.689	15.379	19.589	24.177	29.058	34.132	39.192	44.069	48.76	53.14	57.238	61.047
SSP2	DJI	Djibouti	Mainland Africa	Population	million	0.889	0.968	1.045	1.116	1.182	1.241	1.294	1.34	1.378	1.406	1.427	1.44	1.447	1.448	1.444	1.437	1.425	1.411	1.395		SSP2	DJI	Djibouti	Mainland Africa	GDP|PPP	billion US$2005/yr	1.884	2.381	3.171	4.33	5.883	7.851	10.266	13.129	16.44	20.172	24.342	28.969	33.986	39.336	44.986	50.938	57.143	63.57
SSP3	DJI	Djibouti	Mainland Africa	Population	million	0.889	0.967	1.048	1.129	1.206	1.277	1.342	1.404	1.463	1.515	1.56	1.598	1.63	1.659	1.686	1.713	1.734	1.756	1.773		SSP3	DJI	Djibouti	Mainland Africa	GDP|PPP	billion US$2005/yr	1.884	2.378	3.147	4.21	5.474	6.903	8.508	10.266	12.142	14.099	16.134	18.269	20.488	22.769	25.074	27.378	29.66	31.985
SSP4	DJI	Djibouti	Mainland Africa	Population	million	0.889	0.967	1.048	1.128	1.205	1.274	1.337	1.397	1.454	1.504	1.547	1.582	1.612	1.64	1.665	1.689	1.708	1.727	1.741		SSP4	DJI	Djibouti	Mainland Africa	GDP|PPP	billion US$2005/yr	1.884	2.379	3.143	4.173	5.412	6.787	8.338	10.053	11.912	13.887	15.985	18.228	20.605	23.096	25.663	28.278	30.925	33.673
SSP5	DJI	Djibouti	Mainland Africa	Population	million	0.889	0.961	1.033	1.095	1.146	1.19	1.228	1.258	1.279	1.291	1.295	1.292	1.282	1.265	1.242	1.214	1.181	1.144	1.105		SSP5	DJI	Djibouti	Mainland Africa	GDP|PPP	billion US$2005/yr	1.884	2.364	3.171	4.481	6.547	9.517	13.39	18.172	23.818	30.216	37.309	45.021	53.113	61.378	69.813	78.236	86.679	95.122
SSP1	ECU	Ecuador	Neotropics	Population	million	14.465	15.341	16.091	16.725	17.229	17.632	17.917	18.084	18.13	18.077	17.929	17.708	17.416	17.056	16.633	16.112	15.491	14.791	14.006		SSP1	ECU	Ecuador	Neotropics	GDP|PPP	billion US$2005/yr	104.16	126.267	149.147	180.831	223.232	276.993	341.124	413.649	491.853	575.035	660.988	746.731	829.85	908.07	982.456	1050.12	1109.01	1158.49
SSP2	ECU	Ecuador	Neotropics	Population	million	14.465	15.435	16.347	17.204	17.974	18.653	19.24	19.717	20.089	20.351	20.508	20.592	20.611	20.561	20.447	20.266	20.032	19.751	19.452		SSP2	ECU	Ecuador	Neotropics	GDP|PPP	billion US$2005/yr	104.16	127.048	150.959	180.709	215.201	253.597	298.437	349.74	407.379	471.88	542.918	619.691	701.903	788.737	879.643	973.852	1070.62	1169.63
SSP3	ECU	Ecuador	Neotropics	Population	million	14.465	15.584	16.812	18.079	19.344	20.562	21.752	22.921	24.063	25.151	26.19	27.205	28.205	29.2	30.191	31.18	32.167	33.153	34.134		SSP3	ECU	Ecuador	Neotropics	GDP|PPP	billion US$2005/yr	104.16	128.268	154.093	181.636	208.976	234.626	262.497	292.376	325.044	360.996	400.816	444.738	493.266	546.637	604.112	665.215	730.856	801.307
SSP4	ECU	Ecuador	Neotropics	Population	million	14.465	15.414	16.306	17.073	17.689	18.191	18.571	18.817	18.922	18.91	18.785	18.569	18.265	17.88	17.429	16.919	16.367	15.778	15.165		SSP4	ECU	Ecuador	Neotropics	GDP|PPP	billion US$2005/yr	104.16	126.875	150.15	176.969	207.761	241.346	279.252	320.486	365.554	414.486	466.7	520.32	574.339	627.815	680.443	731.088	780.185	827.782
SSP5	ECU	Ecuador	Neotropics	Population	million	14.465	15.318	16.019	16.576	16.996	17.313	17.511	17.591	17.553	17.418	17.191	16.904	16.558	16.157	15.708	15.174	14.557	13.875	13.124		SSP5	ECU	Ecuador	Neotropics	GDP|PPP	billion US$2005/yr	104.16	126.081	148.714	183.232	234.464	303.883	388.385	486.353	595.026	714.215	841.83	974.762	1109.89	1244.6	1380.96	1515.17	1644.24	1766.98
SSP1	EGY	Egypt	Mainland Africa	Population	million	81.121	87.574	93.382	98.341	102.468	106.094	109.119	111.416	112.941	113.804	114.052	113.762	112.883	111.38	109.293	106.712	103.767	100.542	96.865		SSP1	EGY	Egypt	Mainland Africa	GDP|PPP	billion US$2005/yr	449.698	529.107	708.512	949.807	1279.66	1706.98	2211.75	2761.1	3326.03	3908.13	4502.85	5087.41	5630.08	6119.94	6562.2	6960.06	7318.16	7631.88
SSP2	EGY	Egypt	Mainland Africa	Population	million	81.121	88.084	94.75	100.949	106.685	112	116.868	121.202	124.861	127.969	130.529	132.497	133.778	134.387	134.519	134.22	133.577	132.54	131.239		SSP2	EGY	Egypt	Mainland Africa	GDP|PPP	billion US$2005/yr	449.698	532.191	713.422	938.518	1212.6	1538.82	1918.48	2340.88	2798.54	3301.11	3849.55	4432.07	5032.36	5644.27	6266.97	6902.37	7546.8	8191.21
SSP3	EGY	Egypt	Mainland Africa	Population	million	81.121	88.516	96.216	103.966	111.658	119.164	126.579	133.975	141.264	148.271	154.858	161.066	166.938	172.561	178.014	183.294	188.373	193.207	197.768		SSP3	EGY	Egypt	Mainland Africa	GDP|PPP	billion US$2005/yr	449.698	534.801	719.177	926.668	1148.72	1379.84	1626.01	1877.73	2131.88	2407.14	2709.63	3037.05	3383.76	3749.39	4131.22	4528.12	4942.89	5374.71
SSP4	EGY	Egypt	Mainland Africa	Population	million	81.121	87.584	93.393	98.362	102.471	106.034	108.959	111.106	112.407	112.963	112.785	111.913	110.324	108.054	105.23	102.009	98.512	94.782	90.865		SSP4	EGY	Egypt	Mainland Africa	GDP|PPP	billion US$2005/yr	449.698	529.171	702.058	906.922	1156.22	1442.6	1760.87	2095.82	2437.86	2801.96	3187.84	3576.55	3948	4296.23	4625	4936.89	5234.6	5512.89
SSP5	EGY	Egypt	Mainland Africa	Population	million	81.121	87.503	93.152	97.857	101.71	105.047	107.767	109.75	110.961	111.513	111.457	110.903	109.809	108.143	105.946	103.309	100.356	97.17	93.583		SSP5	EGY	Egypt	Mainland Africa	GDP|PPP	billion US$2005/yr	449.698	528.682	708.613	970.592	1356.45	1882.74	2518.74	3232.65	3994.16	4812.98	5688.98	6597.56	7496.58	8373.07	9235.05	10086.4	10933.8	11769.5
SSP1	SLV	El Salvador	Neotropics	Population	million	6.193	6.271	6.287	6.233	6.123	5.985	5.822	5.635	5.425	5.202	4.967	4.745	4.533	4.329	4.131	3.937	3.736	3.528	3.318		SSP1	SLV	El Salvador	Neotropics	GDP|PPP	billion US$2005/yr	37.019	39.932	45.372	52.418	61.881	73.77	87.514	102.403	117.618	132.479	146.211	159.377	172.33	184.458	195.866	206.446	216.061	224.643
SSP2	SLV	El Salvador	Neotropics	Population	million	6.193	6.304	6.383	6.412	6.396	6.353	6.291	6.2	6.081	5.935	5.77	5.614	5.465	5.321	5.187	5.063	4.948	4.845	4.757		SSP2	SLV	El Salvador	Neotropics	GDP|PPP	billion US$2005/yr	37.019	40.141	45.643	51.785	58.669	66.269	75.07	84.889	95.472	106.592	118.025	130.517	144.455	159.482	175.472	192.445	210.529	229.913
SSP3	SLV	El Salvador	Neotropics	Population	million	6.193	6.401	6.676	6.991	7.293	7.572	7.839	8.098	8.347	8.575	8.78	8.977	9.17	9.361	9.556	9.759	9.979	10.22	10.487		SSP3	SLV	El Salvador	Neotropics	GDP|PPP	billion US$2005/yr	37.019	40.757	47.412	54.392	61.061	67.489	74.515	82.054	89.977	98.124	106.517	115.799	126.469	138.234	150.83	164.164	178.508	194.131
SSP4	SLV	El Salvador	Neotropics	Population	million	6.193	6.28	6.322	6.291	6.199	6.078	5.932	5.759	5.561	5.349	5.122	4.905	4.695	4.49	4.29	4.095	3.905	3.723	3.553		SSP4	SLV	El Salvador	Neotropics	GDP|PPP	billion US$2005/yr	37.019	39.991	44.998	49.513	53.621	56.465	58.87	60.716	61.974	62.632	62.7	62.602	62.552	62.372	62.055	61.631	61.222	60.899
SSP5	SLV	El Salvador	Neotropics	Population	million	6.193	6.218	6.118	5.882	5.59	5.276	4.939	4.583	4.216	3.848	3.484	3.161	2.874	2.622	2.401	2.208	2.032	1.873	1.733		SSP5	SLV	El Salvador	Neotropics	GDP|PPP	billion US$2005/yr	37.019	39.591	44.143	50.54	60.069	72.442	86.015	99.748	112.677	124.149	133.389	141.596	149.187	156.124	163.515	171.04	178.947	187.699
SSP1	GNQ	Equatorial Guinea	Mainland Africa	Population	million	0.7	0.789	0.879	0.967	1.049	1.126	1.196	1.258	1.311	1.358	1.397	1.428	1.449	1.459	1.458	1.447	1.428	1.401	1.367		SSP1	GNQ	Equatorial Guinea	Mainland Africa	GDP|PPP	billion US$2005/yr	21.538	25.047	27.725	33.819	40.671	48.439	57.001	66.215	75.737	85.269	94.775	103.906	112.331	119.627	126.042	131.472	135.909	139.414
SSP2	GNQ	Equatorial Guinea	Mainland Africa	Population	million	0.7	0.799	0.901	1.001	1.097	1.191	1.28	1.365	1.443	1.516	1.583	1.641	1.689	1.728	1.757	1.776	1.785	1.783	1.774		SSP2	GNQ	Equatorial Guinea	Mainland Africa	GDP|PPP	billion US$2005/yr	21.538	25.351	27.974	33.416	39.15	45.328	52.177	59.679	67.726	76.231	85.282	94.671	104.242	113.674	122.936	131.936	140.711	149.14
SSP3	GNQ	Equatorial Guinea	Mainland Africa	Population	million	0.7	0.801	0.903	1.003	1.105	1.203	1.299	1.394	1.49	1.58	1.667	1.751	1.827	1.901	1.97	2.032	2.089	2.138	2.18		SSP3	GNQ	Equatorial Guinea	Mainland Africa	GDP|PPP	billion US$2005/yr	21.538	25.427	27.913	32.544	36.971	41.298	45.755	50.391	55.058	59.603	64.116	68.643	73.033	77.296	81.317	85.127	88.738	92.159
SSP4	GNQ	Equatorial Guinea	Mainland Africa	Population	million	0.7	0.805	0.917	1.032	1.149	1.261	1.371	1.48	1.588	1.691	1.789	1.882	1.965	2.043	2.113	2.174	2.225	2.266	2.296		SSP4	GNQ	Equatorial Guinea	Mainland Africa	GDP|PPP	billion US$2005/yr	21.538	25.561	28.343	33.611	39.413	45.641	52.434	59.883	67.871	76.263	85.225	94.811	104.864	115.41	126.284	137.451	148.878	160.538
SSP5	GNQ	Equatorial Guinea	Mainland Africa	Population	million	0.7	0.793	0.892	0.992	1.087	1.178	1.262	1.337	1.404	1.462	1.513	1.553	1.58	1.594	1.595	1.584	1.563	1.533	1.494		SSP5	GNQ	Equatorial Guinea	Mainland Africa	GDP|PPP	billion US$2005/yr	21.538	25.171	28.174	35.194	43.805	54.315	66.478	80.191	95.113	110.908	127.567	144.617	161.582	177.75	193.212	207.827	221.448	234.079
SSP1	ERI	Eritrea	Mainland Africa	Population	million	5.254	6.004	6.733	7.402	8.027	8.643	9.223	9.731	10.152	10.488	10.75	10.94	11.056	11.095	11.061	10.962	10.804	10.591	10.322		SSP1	ERI	Eritrea	Mainland Africa	GDP|PPP	billion US$2005/yr	2.573	3.187	3.579	4.636	6.429	9.376	13.979	20.892	30.955	44.987	63.763	87.63	116.237	148.845	185.263	224.921	267.196	310.829
SSP2	ERI	Eritrea	Mainland Africa	Population	million	5.254	6.091	6.926	7.727	8.539	9.373	10.193	10.952	11.634	12.243	12.791	13.272	13.686	14.011	14.252	14.4	14.472	14.47	14.393		SSP2	ERI	Eritrea	Mainland Africa	GDP|PPP	billion US$2005/yr	2.573	3.233	3.562	4.383	5.493	6.937	8.952	11.762	15.686	21.106	28.478	38.241	50.809	66.616	86.286	110.448	139.63	174.032
SSP3	ERI	Eritrea	Mainland Africa	Population	million	5.254	6.044	6.85	7.668	8.526	9.404	10.29	11.158	12.003	12.817	13.6	14.365	15.101	15.785	16.434	17.031	17.585	18.094	18.563		SSP3	ERI	Eritrea	Mainland Africa	GDP|PPP	billion US$2005/yr	2.573	3.208	3.412	3.988	4.633	5.288	6.094	7.099	8.369	9.968	11.958	14.4	17.336	20.822	24.963	29.816	35.469	41.982
SSP4	ERI	Eritrea	Mainland Africa	Population	million	5.254	6.057	6.893	7.757	8.665	9.591	10.523	11.439	12.333	13.198	14.031	14.839	15.611	16.324	16.994	17.605	18.161	18.659	19.103		SSP4	ERI	Eritrea	Mainland Africa	GDP|PPP	billion US$2005/yr	2.573	3.215	3.419	3.958	4.527	4.994	5.504	6.082	6.753	7.53	8.413	9.393	10.458	11.604	12.852	14.203	15.671	17.266
SSP5	ERI	Eritrea	Mainland Africa	Population	million	5.254	6.015	6.768	7.474	8.137	8.792	9.412	9.96	10.421	10.793	11.088	11.305	11.441	11.494	11.467	11.37	11.209	10.988	10.709		SSP5	ERI	Eritrea	Mainland Africa	GDP|PPP	billion US$2005/yr	2.573	3.193	3.611	4.852	7.228	11.513	18.529	29.474	45.847	69.179	101.021	142.305	192.885	252.017	319.854	396.057	480.157	570.559
SSP1	SWZ	Eswatini	Mainland Africa	Population	million	1.186	1.254	1.32	1.375	1.417	1.453	1.482	1.504	1.519	1.526	1.525	1.515	1.496	1.47	1.438	1.401	1.361	1.318	1.273		SSP1	SWZ	Eswatini	Mainland Africa	GDP|PPP	billion US$2005/yr	5.638	5.449	5.949	7.196	9.103	11.82	15.39	19.824	25.028	30.86	37.236	44.064	51.095	58.095	64.948	71.442	77.597	83.366
SSP2	SWZ	Eswatini	Mainland Africa	Population	million	1.186	1.263	1.325	1.38	1.427	1.464	1.496	1.523	1.546	1.565	1.579	1.587	1.59	1.588	1.581	1.571	1.557	1.538	1.516		SSP2	SWZ	Eswatini	Mainland Africa	GDP|PPP	billion US$2005/yr	5.638	5.488	5.896	6.864	8.18	9.858	11.991	14.609	17.711	21.301	25.414	30.111	35.382	41.18	47.457	54.171	61.273	68.737
SSP3	SWZ	Eswatini	Mainland Africa	Population	million	1.186	1.268	1.336	1.395	1.449	1.495	1.538	1.582	1.62	1.655	1.688	1.715	1.747	1.785	1.828	1.875	1.922	1.971	2.022		SSP3	SWZ	Eswatini	Mainland Africa	GDP|PPP	billion US$2005/yr	5.638	5.508	5.801	6.429	7.193	8.051	9.05	10.18	11.375	12.657	14.088	15.674	17.479	19.52	21.776	24.267	27.027	30.088
SSP4	SWZ	Eswatini	Mainland Africa	Population	million	1.186	1.266	1.332	1.387	1.437	1.479	1.517	1.556	1.589	1.619	1.646	1.667	1.694	1.726	1.762	1.802	1.841	1.882	1.923		SSP4	SWZ	Eswatini	Mainland Africa	GDP|PPP	billion US$2005/yr	5.638	5.502	5.728	6.227	6.881	7.565	8.341	9.195	10.067	10.975	11.971	13.053	14.267	15.621	17.092	18.692	20.444	22.375
SSP5	SWZ	Eswatini	Mainland Africa	Population	million	1.186	1.253	1.316	1.367	1.406	1.438	1.463	1.482	1.494	1.499	1.496	1.484	1.464	1.438	1.406	1.37	1.33	1.288	1.243		SSP5	SWZ	Eswatini	Mainland Africa	GDP|PPP	billion US$2005/yr	5.638	5.444	5.949	7.339	9.68	13.234	18.035	24.161	31.56	40.109	49.757	60.444	71.888	83.805	96.071	108.379	120.757	133.127
SSP1	ETH	Ethiopia	Mainland Africa	Population	million	82.95	91.763	100.815	109.488	117.123	123.948	129.938	135.127	139.507	143.03	145.64	147.41	148.346	148.44	147.701	146.143	143.806	140.794	137.215		SSP1	ETH	Ethiopia	Mainland Africa	GDP|PPP	billion US$2005/yr	77.328	106.964	148.134	209.408	306.751	457.548	680.036	991.958	1406.96	1932.36	2566.97	3305.19	4137.16	5045.68	6004	6984.45	7965.9	8937.66
SSP2	ETH	Ethiopia	Mainland Africa	Population	million	82.95	92.596	103.021	113.691	123.971	133.596	142.61	151.068	158.829	165.904	172.13	177.361	181.728	185.219	187.822	189.694	190.76	191.231	191.006		SSP2	ETH	Ethiopia	Mainland Africa	GDP|PPP	billion US$2005/yr	77.328	107.936	149.843	203.589	275.659	369.265	497.629	670.221	895.67	1183.64	1543.86	1988.08	2529.57	3178.51	3936.8	4806.6	5789.08	6887.76
SSP3	ETH	Ethiopia	Mainland Africa	Population	million	82.95	93.152	104.814	117.547	130.99	144.219	157.43	170.924	184.87	198.549	211.664	223.849	235.322	246.407	256.88	266.785	276.005	284.582	292.715		SSP3	ETH	Ethiopia	Mainland Africa	GDP|PPP	billion US$2005/yr	77.328	108.584	151.126	198.378	252.318	309.879	379.882	464.405	563.447	677.77	809.222	961.152	1136.99	1338.5	1562.88	1809.33	2078.41	2371.46
SSP4	ETH	Ethiopia	Mainland Africa	Population	million	82.95	93.126	104.76	117.443	130.814	143.906	156.939	170.235	183.966	197.388	210.183	222.041	233.209	244.018	254.239	263.893	272.849	281.145	288.981		SSP4	ETH	Ethiopia	Mainland Africa	GDP|PPP	billion US$2005/yr	77.328	108.554	150.476	194.923	242.8	287.787	338.809	396.54	459.627	527.548	600.687	680.36	767.969	863.58	964.589	1070.57	1182.02	1300.36
SSP5	ETH	Ethiopia	Mainland Africa	Population	million	82.95	91.699	100.591	108.986	116.305	122.792	128.414	133.199	137.152	140.243	142.433	143.839	144.47	144.317	143.399	141.735	139.364	136.385	132.899		SSP5	ETH	Ethiopia	Mainland Africa	GDP|PPP	billion US$2005/yr	77.328	106.89	148.521	216.559	336.684	537.948	844.789	1285.91	1885.19	2658.95	3613.04	4749.13	6062.99	7541.54	9159.15	10884.7	12695	14581.4
SSP1	GAB	Gabon	Mainland Africa	Population	million	1.505	1.622	1.737	1.839	1.926	2.001	2.063	2.112	2.149	2.172	2.184	2.184	2.17	2.144	2.106	2.058	1.999	1.932	1.86		SSP1	GAB	Gabon	Mainland Africa	GDP|PPP	billion US$2005/yr	20.49	23.96	27.81	33.598	40.888	49.624	59.67	70.777	82.442	94.307	106.019	117.396	128.076	137.714	146.561	154.268	160.81	166.244
SSP2	GAB	Gabon	Mainland Africa	Population	million	1.505	1.634	1.759	1.877	1.982	2.075	2.158	2.229	2.288	2.336	2.375	2.402	2.415	2.417	2.41	2.393	2.37	2.339	2.304		SSP2	GAB	Gabon	Mainland Africa	GDP|PPP	billion US$2005/yr	20.49	24.131	27.787	32.683	38.22	44.307	51.282	59.132	67.734	77.046	86.997	97.629	108.785	120.293	132.164	144.215	156.253	168.137
SSP3	GAB	Gabon	Mainland Africa	Population	million	1.505	1.642	1.784	1.922	2.054	2.173	2.287	2.397	2.502	2.597	2.684	2.765	2.842	2.909	2.977	3.037	3.098	3.154	3.21		SSP3	GAB	Gabon	Mainland Africa	GDP|PPP	billion US$2005/yr	20.49	24.253	27.577	31.249	34.852	38.277	41.969	45.926	50.098	54.365	58.702	63.276	68.08	73.007	78.064	83.088	88.231	93.427
SSP4	GAB	Gabon	Mainland Africa	Population	million	1.505	1.643	1.785	1.922	2.053	2.17	2.28	2.387	2.488	2.579	2.662	2.74	2.812	2.876	2.939	2.996	3.051	3.101	3.149		SSP4	GAB	Gabon	Mainland Africa	GDP|PPP	billion US$2005/yr	20.49	24.263	27.399	30.778	34.542	38.526	43.155	48.479	54.526	61.198	68.5	76.611	85.58	95.31	105.827	116.954	128.903	141.606
SSP5	GAB	Gabon	Mainland Africa	Population	million	1.505	1.623	1.738	1.84	1.925	1.998	2.059	2.106	2.141	2.163	2.174	2.173	2.159	2.133	2.095	2.047	1.989	1.923	1.852		SSP5	GAB	Gabon	Mainland Africa	GDP|PPP	billion US$2005/yr	20.49	23.969	27.886	34.225	42.921	54.034	67.224	82.329	98.863	116.498	134.905	153.876	172.921	191.541	210.025	227.835	244.842	261.018
SSP1	GMB	Gambia	Mainland Africa	Population	million	1.728	1.934	2.122	2.293	2.443	2.581	2.7	2.795	2.865	2.914	2.943	2.961	2.966	2.958	2.937	2.904	2.861	2.807	2.743		SSP1	GMB	Gambia	Mainland Africa	GDP|PPP	billion US$2005/yr	3.169	4.073	5.269	7.194	10.163	14.433	20.194	27.615	36.807	47.819	60.511	74.646	89.835	105.617	121.922	138.534	155.108	171.334
SSP2	GMB	Gambia	Mainland Africa	Population	million	1.728	1.959	2.185	2.4	2.601	2.794	2.976	3.137	3.273	3.386	3.482	3.566	3.64	3.7	3.749	3.785	3.814	3.831	3.838		SSP2	GMB	Gambia	Mainland Africa	GDP|PPP	billion US$2005/yr	3.169	4.124	5.387	7.207	9.662	12.751	16.694	21.614	27.68	35.06	43.884	54.287	66.333	80.023	95.427	112.629	131.623	152.326
SSP3	GMB	Gambia	Mainland Africa	Population	million	1.728	1.977	2.239	2.512	2.797	3.079	3.357	3.629	3.89	4.141	4.38	4.608	4.83	5.042	5.247	5.443	5.632	5.819	5.994		SSP3	GMB	Gambia	Mainland Africa	GDP|PPP	billion US$2005/yr	3.169	4.162	5.472	7.158	9.141	11.318	13.835	16.712	19.964	23.624	27.694	32.191	37.157	42.564	48.404	54.684	61.417	68.642
SSP4	GMB	Gambia	Mainland Africa	Population	million	1.728	1.974	2.228	2.488	2.753	3.01	3.261	3.501	3.73	3.945	4.146	4.338	4.527	4.709	4.886	5.057	5.222	5.385	5.538		SSP4	GMB	Gambia	Mainland Africa	GDP|PPP	billion US$2005/yr	3.169	4.156	5.437	7.007	8.796	10.588	12.539	14.644	16.894	19.299	21.846	24.559	27.465	30.539	33.773	37.183	40.789	44.639
SSP5	GMB	Gambia	Mainland Africa	Population	million	1.728	1.931	2.11	2.265	2.396	2.511	2.603	2.669	2.71	2.727	2.726	2.716	2.699	2.673	2.639	2.599	2.552	2.5	2.444		SSP5	GMB	Gambia	Mainland Africa	GDP|PPP	billion US$2005/yr	3.169	4.066	5.254	7.301	10.765	16.115	23.539	33.279	45.504	60.321	77.606	97.25	118.895	142.098	167.041	193.598	221.516	250.561
SSP1	GHA	Ghana	Mainland Africa	Population	million	24.392	26.933	29.309	31.524	33.555	35.495	37.252	38.726	39.901	40.804	41.472	41.948	42.215	42.255	42.07	41.673	41.086	40.321	39.392		SSP1	GHA	Ghana	Mainland Africa	GDP|PPP	billion US$2005/yr	36.062	55.153	77.543	110.358	158.72	228.643	321.624	438.635	579.069	744.039	933.211	1142.77	1364.38	1588.8	1816.17	2043.04	2263.85	2473.6
SSP2	GHA	Ghana	Mainland Africa	Population	million	24.392	27.248	30.161	33.061	35.931	38.764	41.5	44.057	46.376	48.418	50.26	51.924	53.389	54.66	55.682	56.487	57.046	57.397	57.597		SSP2	GHA	Ghana	Mainland Africa	GDP|PPP	billion US$2005/yr	36.062	55.799	78.909	108.797	146.224	192.465	250.972	324.134	414.345	525.286	660.201	821.237	1008.74	1221.93	1460.92	1725.4	2013.73	2322.32
SSP3	GHA	Ghana	Mainland Africa	Population	million	24.392	27.451	30.757	34.303	38.128	42.076	46.134	50.296	54.504	58.656	62.707	66.687	70.628	74.424	78.159	81.707	85.095	88.333	91.449		SSP3	GHA	Ghana	Mainland Africa	GDP|PPP	billion US$2005/yr	36.062	56.214	79.745	106.62	135.316	164.25	196.746	233.437	274.819	322.918	379.032	444.119	518.518	602.134	695.226	796.929	907.558	1026.59
SSP4	GHA	Ghana	Mainland Africa	Population	million	24.392	27.445	30.746	34.287	38.096	41.992	45.96	50.002	54.061	58.029	61.853	65.577	69.237	72.734	76.149	79.358	82.375	85.204	87.867		SSP4	GHA	Ghana	Mainland Africa	GDP|PPP	billion US$2005/yr	36.062	56.202	79.52	104.961	130.783	154.137	178.912	205.761	235.078	268.217	305.507	347.011	392.778	442.374	495.673	552.286	612.284	675.545
SSP5	GHA	Ghana	Mainland Africa	Population	million	24.392	26.92	29.263	31.414	33.365	35.21	36.855	38.207	39.251	40.016	40.542	40.889	41.045	40.995	40.739	40.295	39.682	38.914	38.003		SSP5	GHA	Ghana	Mainland Africa	GDP|PPP	billion US$2005/yr	36.062	55.127	77.674	113.512	171.59	261.494	384.581	543.554	739.008	974.364	1251.81	1569.22	1917.3	2285.78	2677.98	3091.41	3520.21	3958.57
SSP1	GTM	Guatemala	Neotropics	Population	million	14.389	15.744	16.881	17.882	18.726	19.433	19.979	20.367	20.612	20.746	20.773	20.731	20.614	20.415	20.132	19.764	19.311	18.779	18.157		SSP1	GTM	Guatemala	Neotropics	GDP|PPP	billion US$2005/yr	61.823	70.38	84.241	109.473	145.955	195.437	257.775	333.263	421.044	519.802	626.124	737.7	850.799	962.727	1075.97	1188.19	1296.08	1397.95
SSP2	GTM	Guatemala	Neotropics	Population	million	14.389	15.988	17.505	18.98	20.401	21.724	22.911	23.999	24.965	25.812	26.512	27.143	27.699	28.142	28.486	28.718	28.866	28.921	28.893		SSP2	GTM	Guatemala	Neotropics	GDP|PPP	billion US$2005/yr	61.823	71.472	85.517	107.494	135.968	170.35	212.341	263.332	324.489	396.543	479.65	575.129	683.539	805.112	940.754	1090.77	1254.34	1430.37
SSP3	GTM	Guatemala	Neotropics	Population	million	14.389	16.204	18.278	20.539	22.916	25.321	27.768	30.283	32.856	35.42	37.949	40.47	42.983	45.457	47.888	50.272	52.615	54.898	57.116		SSP3	GTM	Guatemala	Neotropics	GDP|PPP	billion US$2005/yr	61.823	72.439	86.842	105.867	128.527	153.325	181.687	214.166	251.027	292.451	338.475	389.902	447.309	511.061	581.198	657.459	740.356	830.06
SSP4	GTM	Guatemala	Neotropics	Population	million	14.389	16.168	18.161	20.277	22.473	24.661	26.863	29.106	31.376	33.607	35.775	37.949	40.136	42.314	44.484	46.641	48.791	50.915	53.008		SSP4	GTM	Guatemala	Neotropics	GDP|PPP	billion US$2005/yr	61.823	72.278	85.768	102.481	122.076	141.898	163.4	186.857	212.27	239.595	268.675	300.186	334.471	371.711	411.864	454.854	501.165	551.15
SSP5	GTM	Guatemala	Neotropics	Population	million	14.389	15.702	16.739	17.569	18.215	18.704	19.014	19.155	19.148	19.032	18.813	18.559	18.269	17.937	17.562	17.145	16.684	16.185	15.637		SSP5	GTM	Guatemala	Neotropics	GDP|PPP	billion US$2005/yr	61.823	70.192	83.758	110.407	152.612	213.98	292.89	389.647	503.323	632.529	773.33	924.37	1081.79	1243.21	1414.36	1592.97	1775.99	1962.2
SSP1	GIN	Guinea	Mainland Africa	Population	million	9.982	10.758	11.461	12.082	12.583	12.997	13.299	13.485	13.564	13.557	13.479	13.387	13.275	13.139	12.974	12.778	12.553	12.298	12.015		SSP1	GIN	Guinea	Mainland Africa	GDP|PPP	billion US$2005/yr	9.766	13.347	26.01	46.8	79.502	126.084	186.21	258.779	341.872	433.323	529.737	629.265	728.733	825.575	920.794	1013.67	1102.95	1187.88
SSP2	GIN	Guinea	Mainland Africa	Population	million	9.982	10.897	11.778	12.604	13.356	14.03	14.613	15.099	15.48	15.75	15.937	16.108	16.255	16.382	16.47	16.528	16.556	16.571	16.576		SSP2	GIN	Guinea	Mainland Africa	GDP|PPP	billion US$2005/yr	9.766	13.521	25.584	41.833	63.253	89.87	123.679	165.552	216.266	276.169	345.111	423.995	512.607	610.316	717.338	833.893	959.853	1094.88
SSP3	GIN	Guinea	Mainland Africa	Population	million	9.982	11.062	12.259	13.541	14.875	16.159	17.38	18.541	19.652	20.666	21.586	22.447	23.264	24.013	24.703	25.336	25.913	26.445	26.963		SSP3	GIN	Guinea	Mainland Africa	GDP|PPP	billion US$2005/yr	9.766	13.725	25.427	38.439	52.7	67.256	83.634	102.042	122.572	144.919	168.745	194.19	221.274	249.589	278.88	308.909	339.618	370.927
SSP4	GIN	Guinea	Mainland Africa	Population	million	9.982	11.001	12.057	13.097	14.15	15.126	16.021	16.842	17.599	18.254	18.817	19.364	19.912	20.444	20.962	21.463	21.948	22.424	22.916		SSP4	GIN	Guinea	Mainland Africa	GDP|PPP	billion US$2005/yr	9.766	13.649	24.859	36.424	48.143	58.726	69.852	81.689	94.309	107.488	121.022	135.298	150.417	166.192	182.544	199.504	217.204	235.756
SSP5	GIN	Guinea	Mainland Africa	Population	million	9.982	10.696	11.26	11.649	11.889	12.015	12	11.844	11.568	11.203	10.772	10.375	10.013	9.681	9.375	9.093	8.835	8.599	8.384		SSP5	GIN	Guinea	Mainland Africa	GDP|PPP	billion US$2005/yr	9.766	13.271	25.976	48.645	86.861	142.676	212.346	292.951	381.682	476.177	572.823	672.328	772.314	871.661	975.16	1083.25	1196.67	1316.25
SSP1	GNB	Guinea-Bissau	Mainland Africa	Population	million	1.515	1.644	1.765	1.876	1.972	2.059	2.134	2.194	2.237	2.265	2.281	2.286	2.282	2.267	2.241	2.206	2.162	2.111	2.053		SSP1	GNB	Guinea-Bissau	Mainland Africa	GDP|PPP	billion US$2005/yr	1.612	1.991	2.481	3.433	5.105	7.825	11.835	17.435	24.827	34.151	45.391	58.4	72.836	88.266	104.509	121.232	138.065	154.671
SSP2	GNB	Guinea-Bissau	Mainland Africa	Population	million	1.515	1.665	1.811	1.948	2.074	2.195	2.307	2.405	2.488	2.556	2.61	2.652	2.684	2.705	2.713	2.707	2.693	2.673	2.649		SSP2	GNB	Guinea-Bissau	Mainland Africa	GDP|PPP	billion US$2005/yr	1.612	2.016	2.518	3.341	4.581	6.32	8.718	11.943	16.16	21.543	28.246	36.418	46.161	57.51	70.509	85.149	101.48	119.441
SSP3	GNB	Guinea-Bissau	Mainland Africa	Population	million	1.515	1.679	1.848	2.018	2.19	2.355	2.51	2.657	2.794	2.918	3.025	3.121	3.202	3.275	3.336	3.384	3.428	3.459	3.488		SSP3	GNB	Guinea-Bissau	Mainland Africa	GDP|PPP	billion US$2005/yr	1.612	2.033	2.54	3.232	4.111	5.147	6.403	7.921	9.704	11.76	14.071	16.659	19.504	22.606	25.917	29.398	33.067	36.869
SSP4	GNB	Guinea-Bissau	Mainland Africa	Population	million	1.515	1.677	1.842	2.005	2.169	2.325	2.47	2.607	2.733	2.847	2.942	3.03	3.102	3.168	3.224	3.267	3.306	3.333	3.359		SSP4	GNB	Guinea-Bissau	Mainland Africa	GDP|PPP	billion US$2005/yr	1.612	2.031	2.527	3.176	3.969	4.825	5.809	6.944	8.216	9.618	11.125	12.749	14.472	16.289	18.17	20.097	22.094	24.137
SSP5	GNB	Guinea-Bissau	Mainland Africa	Population	million	1.515	1.642	1.758	1.862	1.949	2.028	2.093	2.143	2.176	2.194	2.199	2.197	2.186	2.166	2.137	2.1	2.056	2.006	1.951		SSP5	GNB	Guinea-Bissau	Mainland Africa	GDP|PPP	billion US$2005/yr	1.612	1.989	2.487	3.552	5.602	9.175	14.609	22.366	32.796	46.183	62.629	82.112	104.326	128.834	155.591	184.281	214.511	245.906
SSP1	GUY	Guyana	Neotropics	Population	million	0.754	0.759	0.762	0.76	0.749	0.733	0.712	0.687	0.659	0.629	0.598	0.568	0.54	0.512	0.486	0.46	0.434	0.409	0.385		SSP1	GUY	Guyana	Neotropics	GDP|PPP	billion US$2005/yr	2.342	3.012	3.685	4.584	5.653	6.963	8.478	10.246	12.217	14.263	16.111	17.701	19.238	20.903	22.503	23.948	25.192	26.29
SSP2	GUY	Guyana	Neotropics	Population	million	0.754	0.763	0.774	0.782	0.782	0.777	0.766	0.75	0.732	0.712	0.688	0.666	0.645	0.625	0.607	0.589	0.573	0.558	0.546		SSP2	GUY	Guyana	Neotropics	GDP|PPP	billion US$2005/yr	2.342	3.029	3.695	4.462	5.197	5.925	6.734	7.711	8.857	10.109	11.34	12.578	13.994	15.701	17.559	19.511	21.534	23.685
SSP3	GUY	Guyana	Neotropics	Population	million	0.754	0.773	0.804	0.843	0.88	0.908	0.928	0.945	0.963	0.98	0.995	1.007	1.017	1.027	1.038	1.051	1.065	1.081	1.099		SSP3	GUY	Guyana	Neotropics	GDP|PPP	billion US$2005/yr	2.342	3.068	3.793	4.582	5.273	5.87	6.483	7.2	8.032	8.921	9.773	10.628	11.645	12.897	14.264	15.698	17.185	18.777
SSP4	GUY	Guyana	Neotropics	Population	million	0.754	0.761	0.768	0.769	0.761	0.746	0.726	0.701	0.673	0.643	0.611	0.581	0.551	0.523	0.495	0.468	0.442	0.417	0.395		SSP4	GUY	Guyana	Neotropics	GDP|PPP	billion US$2005/yr	2.342	3.02	3.634	4.301	4.98	5.677	6.442	7.348	8.397	9.526	10.595	11.601	12.689	13.961	15.268	16.539	17.749	18.944
SSP5	GUY	Guyana	Neotropics	Population	million	0.754	0.753	0.745	0.722	0.691	0.656	0.617	0.574	0.53	0.484	0.44	0.4	0.365	0.333	0.305	0.28	0.258	0.238	0.221		SSP5	GUY	Guyana	Neotropics	GDP|PPP	billion US$2005/yr	2.342	2.988	3.61	4.491	5.654	7.153	8.831	10.694	12.657	14.577	16.165	17.421	18.528	19.719	20.956	22.208	23.406	24.612
SSP1	HND	Honduras	Neotropics	Population	million	7.601	8.193	8.697	9.121	9.457	9.725	9.92	10.042	10.094	10.09	10.032	9.937	9.805	9.636	9.431	9.191	8.919	8.603	8.24		SSP1	HND	Honduras	Neotropics	GDP|PPP	billion US$2005/yr	26.744	31.172	37.385	47.531	62.881	84.158	111.469	144.95	183.986	227.894	275.427	325.793	377.605	429.512	481.919	533.566	583.407	630.264
SSP2	HND	Honduras	Neotropics	Population	million	7.601	8.28	8.924	9.522	10.061	10.551	10.987	11.356	11.659	11.906	12.096	12.238	12.331	12.377	12.389	12.364	12.306	12.22	12.122		SSP2	HND	Honduras	Neotropics	GDP|PPP	billion US$2005/yr	26.744	31.506	38.096	47.465	59.623	74.338	92.514	114.549	140.747	171.423	206.745	247.322	293.4	345.116	402.767	466.165	534.942	608.928
SSP3	HND	Honduras	Neotropics	Population	million	7.601	8.377	9.245	10.154	11.067	11.959	12.843	13.722	14.595	15.443	16.253	17.037	17.793	18.526	19.24	19.943	20.635	21.321	22.001		SSP3	HND	Honduras	Neotropics	GDP|PPP	billion US$2005/yr	26.744	31.874	39.091	48.067	58.08	68.764	80.953	94.71	110.063	126.967	145.415	165.821	188.444	213.332	240.297	269.242	300.434	334.033
SSP4	HND	Honduras	Neotropics	Population	million	7.601	8.36	9.185	10.017	10.837	11.623	12.392	13.146	13.883	14.587	15.248	15.892	16.522	17.146	17.767	18.392	19.022	19.659	20.303		SSP4	HND	Honduras	Neotropics	GDP|PPP	billion US$2005/yr	26.744	31.807	38.757	46.803	55.481	63.83	72.862	82.576	92.975	104	115.63	128.23	141.981	156.92	172.922	189.998	208.418	228.394
SSP5	HND	Honduras	Neotropics	Population	million	7.601	8.171	8.625	8.962	9.202	9.367	9.454	9.465	9.409	9.298	9.137	8.956	8.756	8.536	8.298	8.044	7.777	7.483	7.161		SSP5	HND	Honduras	Neotropics	GDP|PPP	billion US$2005/yr	26.744	31.091	37.18	47.996	66.002	92.608	127.413	170.654	221.686	279.81	343.666	412.905	486.134	562.126	642.385	725.561	810.862	897.19
SSP1	IND	India	South Asia	Population	million	1224.61	1297.95	1361.28	1415.17	1458.93	1495.68	1523.66	1542.22	1550.4	1548.52	1536.25	1513.67	1481.44	1440.15	1390.77	1334.36	1272.41	1206.55	1138.44		SSP1	IND	India	South Asia	GDP|PPP	billion US$2005/yr	3653.1	4978.69	6913.94	9624.81	13287.6	18045.8	23739.6	30127.7	36896.7	43907	50962.1	57813.3	64146.9	69758.3	74746	79032.7	82536.7	85245.9
SSP2	IND	India	South Asia	Population	million	1224.61	1307.93	1388.09	1461.77	1528.6	1590.44	1645.88	1694.57	1733.8	1762.64	1779.3	1784.82	1781.25	1768.81	1747.8	1718.94	1684.43	1644.92	1602.94		SSP2	IND	India	South Asia	GDP|PPP	billion US$2005/yr	3653.1	5016.98	6971.73	9403.75	12207.7	15398.4	19051.1	23112.7	27538.5	32332.8	37477.4	42904.3	48503.5	54182.6	59878.2	65534.1	71141.1	76662.3
SSP3	IND	India	South Asia	Population	million	1224.61	1315.8	1412.09	1508.2	1603.71	1696.03	1787.9	1880.14	1970.55	2054.63	2131.45	2202.09	2268.34	2331.89	2392.62	2450.02	2504.99	2557.97	2608.62		SSP3	IND	India	South Asia	GDP|PPP	billion US$2005/yr	3653.1	5047.16	7025.45	9187.03	11288.5	13239.4	15183.2	17071.5	18892.2	20687.4	22487	24310	26142.1	27981.4	29790.3	31560.4	33334	35123.7
SSP4	IND	India	South Asia	Population	million	1224.61	1303.31	1376.33	1438.74	1489.14	1531.74	1565.23	1589	1600.94	1600.57	1587.51	1562.28	1525.97	1480.03	1426.16	1366.43	1302.63	1236.43	1169.26		SSP4	IND	India	South Asia	GDP|PPP	billion US$2005/yr	3653.1	4999.23	6901.44	9162.56	11709.2	14493.2	17509.7	20647.3	23838.4	27082.1	30339.7	33501.1	36450.8	39125.6	41545.4	43704.4	45641.9	47371.2
SSP5	IND	India	South Asia	Population	million	1224.61	1297.66	1360.71	1414.15	1457.43	1493.69	1521.18	1539.27	1547	1544.71	1532.07	1509.2	1476.77	1435.37	1385.98	1329.63	1267.84	1202.19	1134.34		SSP5	IND	India	South Asia	GDP|PPP	billion US$2005/yr	3653.1	4977.59	6946.39	9956.54	14398.4	20543	28108.6	36872.7	46498.3	56868	67787.1	78954.3	89931.8	100430	110570	120213	129183	137392
SSP1	IDN	Indonesia	Southeast Asia	Population	million	239.871	250.506	259.299	265.939	270.466	273.396	274.521	273.772	271.071	266.646	260.655	253.356	245.009	235.81	225.992	215.72	205.16	194.444	183.659		SSP1	IDN	Indonesia	Southeast Asia	GDP|PPP	billion US$2005/yr	929.865	1262.3	1752.64	2465.62	3417.52	4637.53	6051.91	7554.43	9086.7	10617.6	12099.5	13477.6	14682.9	15710.2	16581.4	17294.6	17857.9	18279.2
SSP2	IDN	Indonesia	Southeast Asia	Population	million	239.871	251.396	261.705	270.395	277.364	282.723	286.314	287.958	287.522	285.512	282.01	277.241	271.456	264.911	257.844	250.451	242.867	235.195	227.518		SSP2	IDN	Indonesia	Southeast Asia	GDP|PPP	billion US$2005/yr	929.865	1266.78	1751.52	2364.56	3044.99	3783.11	4599.04	5456.45	6334.96	7237.84	8153.69	9065.75	9952.26	10823.8	11685.5	12535.4	13370.4	14189
SSP3	IDN	Indonesia	Southeast Asia	Population	million	239.871	252.27	264.214	275.223	285.082	293.068	299.273	303.86	306.913	308.368	308.46	307.473	305.783	303.636	301.292	298.842	296.382	293.966	291.627		SSP3	IDN	Indonesia	Southeast Asia	GDP|PPP	billion US$2005/yr	929.865	1271.18	1757.14	2313.37	2843.92	3315.37	3769.18	4179.36	4534.45	4849.11	5127.83	5373.42	5586.98	5783.99	5966.93	6137.14	6299.96	6458.52
SSP4	IDN	Indonesia	Southeast Asia	Population	million	239.871	250.243	258.522	264.351	267.771	269.292	268.717	266.001	261.103	254.272	245.742	235.832	224.881	213.197	201.059	188.707	176.346	164.164	152.336		SSP4	IDN	Indonesia	Southeast Asia	GDP|PPP	billion US$2005/yr	929.865	1260.97	1730.75	2316.57	2979.94	3700.59	4481.02	5271.98	6044.95	6799.38	7521.64	8182.33	8753.25	9242.69	9668.9	10033.9	10342.6	10598.2
SSP5	IDN	Indonesia	Southeast Asia	Population	million	239.871	250.343	258.896	265.176	269.335	271.895	272.661	271.572	268.552	263.83	257.567	250.053	241.552	232.257	222.398	212.137	201.633	191.013	180.359		SSP5	IDN	Indonesia	Southeast Asia	GDP|PPP	billion US$2005/yr	929.865	1261.48	1759.81	2553.76	3722.48	5313.94	7214.56	9309.2	11506.8	13771	16050.7	18282.1	20372.3	22314.6	24136.6	25829.2	27393.8	28830.1
SSP1	JPN	Japan	Southeast Asia	Population	million	126.536	126.34	125.483	124.106	122.372	120.409	118.294	116.058	113.714	111.324	108.56	105.281	101.598	97.678	93.649	89.408	85.155	80.988	76.936		SSP1	JPN	Japan	Southeast Asia	GDP|PPP	billion US$2005/yr	3899.3	4130.56	4351.95	4656.49	5022.83	5403.34	5754.02	6107.17	6436.96	6765.86	7085.56	7372.86	7623.65	7829.23	7994.34	8130.77	8245.62	8339.46
SSP2	JPN	Japan	Southeast Asia	Population	million	126.536	126.105	124.813	122.85	120.41	117.67	114.754	111.708	108.609	105.523	102.415	99.095	95.619	92.122	88.69	85.172	81.686	78.276	74.941		SSP2	JPN	Japan	Southeast Asia	GDP|PPP	billion US$2005/yr	3899.3	4122.86	4320.84	4551.24	4764.43	4923.42	5049.35	5186.44	5319.23	5467.87	5630.8	5790.02	5944.11	6087.71	6224.97	6363.88	6507.13	6652.29
SSP3	JPN	Japan	Southeast Asia	Population	million	126.536	125.556	123.211	119.74	115.474	110.794	105.844	100.732	95.502	90.231	84.811	79.273	73.79	68.509	63.563	58.91	54.516	50.329	46.331		SSP3	JPN	Japan	Southeast Asia	GDP|PPP	billion US$2005/yr	3899.3	4104.91	4262	4414.22	4509.94	4502.38	4427.72	4333.65	4212.84	4090.03	3967.24	3834.92	3693.54	3542.96	3397.22	3264.97	3146.85	3039.14
SSP4	JPN	Japan	Southeast Asia	Population	million	126.536	125.867	124.147	121.593	118.399	114.884	111.147	107.197	103.098	98.955	94.727	90.251	85.598	80.908	76.267	71.541	66.872	62.319	57.898		SSP4	JPN	Japan	Southeast Asia	GDP|PPP	billion US$2005/yr	3899.3	4115.09	4308.48	4587.02	4929.74	5274.63	5576.05	5868.76	6129.46	6380.29	6619.22	6817.7	6967.05	7058.86	7111.7	7136.98	7142.53	7128.71
SSP5	JPN	Japan	Southeast Asia	Population	million	126.536	126.661	126.426	125.966	125.369	124.606	123.783	122.997	122.31	121.74	120.939	119.659	117.974	116.055	114.046	111.836	109.608	107.441	105.342		SSP5	JPN	Japan	Southeast Asia	GDP|PPP	billion US$2005/yr	3899.3	4141.06	4395.48	4812.49	5381.94	6042.09	6703.69	7414.79	8158.48	8969.4	9845.77	10763.9	11728.1	12731	13761.9	14833.7	15952.9	17120.7
SSP1	KEN	Kenya	Mainland Africa	Population	million	40.513	45.206	49.716	53.995	57.974	61.758	65.165	68.04	70.348	72.176	73.562	74.593	75.24	75.491	75.374	74.92	74.148	73.059	71.663		SSP1	KEN	Kenya	Mainland Africa	GDP|PPP	billion US$2005/yr	60.007	76.752	102	140.513	199.306	285.098	403.228	558.681	755.228	996.337	1283.65	1613.24	1974.49	2356.09	2756.14	3167.45	3580.45	3985.36
SSP2	KEN	Kenya	Mainland Africa	Population	million	40.513	45.566	50.658	55.667	60.593	65.439	70.035	74.279	78.056	81.308	84.165	86.76	89.022	90.979	92.594	93.827	94.732	95.269	95.541		SSP2	KEN	Kenya	Mainland Africa	GDP|PPP	billion US$2005/yr	60.007	77.364	102.303	135.979	180.06	235.291	306.367	396.726	509.871	650.484	823.176	1031.33	1276.3	1558.28	1879.85	2242.61	2646.28	3088.1
SSP3	KEN	Kenya	Mainland Africa	Population	million	40.513	46.243	52.534	59.163	66.205	73.416	80.85	88.387	95.946	103.202	110.276	117.146	124.052	130.825	137.407	143.724	149.744	155.463	160.98		SSP3	KEN	Kenya	Mainland Africa	GDP|PPP	billion US$2005/yr	60.007	78.513	104.759	135.592	170.281	207.502	251.565	303.673	365.337	438.126	524.291	625.223	742.373	876.281	1027.1	1195.06	1381.53	1586.38
SSP4	KEN	Kenya	Mainland Africa	Population	million	40.513	46.118	52.139	58.404	64.995	71.633	78.358	85.061	91.675	97.918	103.901	109.65	115.398	120.993	126.388	131.514	136.331	140.83	145.095		SSP4	KEN	Kenya	Mainland Africa	GDP|PPP	billion US$2005/yr	60.007	78.301	103.843	132.416	163.456	193.524	226.984	264.567	307.149	355.3	409.85	470.983	539.155	614.09	695.442	783.302	878.248	980.318
SSP5	KEN	Kenya	Mainland Africa	Population	million	40.513	45.16	49.553	53.621	57.34	60.814	63.859	66.334	68.216	69.599	70.526	71.15	71.452	71.429	71.11	70.526	69.694	68.615	67.294		SSP5	KEN	Kenya	Mainland Africa	GDP|PPP	billion US$2005/yr	60.007	76.674	101.936	143.652	214.093	325.061	482.721	695.283	969.428	1311.96	1727.88	2216.67	2767.83	3370.06	4026.74	4732.27	5477.86	6253.1
SSP1	LAO	Lao PDR	Southeast Asia	Population	million	6.201	6.585	6.931	7.217	7.422	7.564	7.647	7.675	7.653	7.585	7.469	7.317	7.13	6.912	6.667	6.4	6.122	5.841	5.565		SSP1	LAO	Lao PDR	Southeast Asia	GDP|PPP	billion US$2005/yr	14.34	20.914	30.172	42.545	59.072	80.352	105.991	135.284	166.953	199.335	231.079	262.183	292.238	320.439	346.288	368.97	388.834	406.611
SSP2	LAO	Lao PDR	Southeast Asia	Population	million	6.201	6.637	7.066	7.46	7.802	8.079	8.304	8.486	8.631	8.729	8.765	8.751	8.698	8.624	8.54	8.449	8.352	8.246	8.134		SSP2	LAO	Lao PDR	Southeast Asia	GDP|PPP	billion US$2005/yr	14.34	21.077	30.413	41.328	53.504	66.822	82.23	99.753	119.22	140.211	162.566	187.055	214.16	243.811	275.415	308.634	343.621	380.765
SSP3	LAO	Lao PDR	Southeast Asia	Population	million	6.201	6.681	7.226	7.796	8.335	8.812	9.245	9.675	10.111	10.512	10.858	11.163	11.436	11.72	12.032	12.357	12.69	13.017	13.351		SSP3	LAO	Lao PDR	Southeast Asia	GDP|PPP	billion US$2005/yr	14.34	21.217	30.835	41.3	51.577	61.199	71.334	82.003	92.973	103.784	114.565	126.029	138.578	152.244	166.64	181.549	197.352	214.497
SSP4	LAO	Lao PDR	Southeast Asia	Population	million	6.201	6.667	7.179	7.691	8.165	8.574	8.937	9.294	9.651	9.969	10.232	10.462	10.671	10.898	11.156	11.429	11.713	11.994	12.285		SSP4	LAO	Lao PDR	Southeast Asia	GDP|PPP	billion US$2005/yr	14.34	21.173	30.551	40.057	48.789	55.863	62.745	69.505	75.996	81.921	87.485	93.296	99.665	106.604	113.842	121.295	129.279	138.141
SSP5	LAO	Lao PDR	Southeast Asia	Population	million	6.201	6.57	6.88	7.107	7.251	7.331	7.351	7.316	7.233	7.108	6.941	6.749	6.533	6.296	6.041	5.776	5.508	5.245	4.992		SSP5	LAO	Lao PDR	Southeast Asia	GDP|PPP	billion US$2005/yr	14.34	20.865	30.183	43.8	63.836	91.237	124.602	163.028	205.053	248.795	292.72	337.199	381.823	425.787	468.933	510.019	549.493	588.461
SSP1	LSO	Lesotho	Mainland Africa	Population	million	2.171	2.254	2.342	2.415	2.467	2.504	2.528	2.541	2.542	2.53	2.505	2.467	2.419	2.361	2.294	2.22	2.139	2.054	1.965		SSP1	LSO	Lesotho	Mainland Africa	GDP|PPP	billion US$2005/yr	3.119	3.947	4.886	6.383	8.737	12.224	17.131	23.69	32.014	42.102	53.842	66.997	81.202	95.967	110.992	125.68	139.784	153.125
SSP2	LSO	Lesotho	Mainland Africa	Population	million	2.171	2.273	2.369	2.453	2.521	2.572	2.612	2.644	2.666	2.677	2.679	2.671	2.658	2.634	2.605	2.571	2.532	2.489	2.445		SSP2	LSO	Lesotho	Mainland Africa	GDP|PPP	billion US$2005/yr	3.119	3.981	4.914	6.173	7.826	9.888	12.612	16.119	20.499	25.866	32.336	40.044	49.098	59.498	71.239	84.283	98.582	114.078
SSP3	LSO	Lesotho	Mainland Africa	Population	million	2.171	2.275	2.376	2.469	2.558	2.63	2.695	2.752	2.811	2.86	2.901	2.934	2.964	3	3.04	3.081	3.124	3.17	3.218		SSP3	LSO	Lesotho	Mainland Africa	GDP|PPP	billion US$2005/yr	3.119	3.984	4.888	5.927	7.077	8.26	9.677	11.32	13.209	15.332	17.696	20.329	23.277	26.554	30.156	34.054	38.289	42.914
SSP4	LSO	Lesotho	Mainland Africa	Population	million	2.171	2.272	2.367	2.451	2.531	2.593	2.648	2.696	2.746	2.786	2.816	2.84	2.862	2.889	2.921	2.954	2.987	3.024	3.062		SSP4	LSO	Lesotho	Mainland Africa	GDP|PPP	billion US$2005/yr	3.119	3.979	4.851	5.779	6.771	7.675	8.717	9.879	11.169	12.57	14.081	15.718	17.512	19.465	21.568	23.801	26.199	28.805
SSP5	LSO	Lesotho	Mainland Africa	Population	million	2.171	2.25	2.331	2.392	2.432	2.458	2.472	2.474	2.465	2.444	2.411	2.367	2.314	2.254	2.186	2.112	2.033	1.95	1.865		SSP5	LSO	Lesotho	Mainland Africa	GDP|PPP	billion US$2005/yr	3.119	3.941	4.883	6.549	9.452	14.063	20.715	29.808	41.595	56.186	73.549	93.507	115.685	139.525	164.765	190.591	216.681	242.804
SSP1	LBR	Liberia	Mainland Africa	Population	million	3.994	4.792	5.579	6.36	7.104	7.828	8.511	9.134	9.687	10.167	10.572	10.887	11.109	11.235	11.269	11.217	11.086	10.881	10.609		SSP1	LBR	Liberia	Mainland Africa	GDP|PPP	billion US$2005/yr	1.926	2.932	4.65	7.933	13.378	22.285	35.88	55.689	83.026	118.893	163.989	217.839	278.944	345.279	415.869	488.377	560.994	632.109
SSP2	LBR	Liberia	Mainland Africa	Population	million	3.994	4.857	5.752	6.67	7.585	8.496	9.393	10.268	11.094	11.851	12.548	13.166	13.692	14.135	14.48	14.715	14.854	14.894	14.86		SSP2	LBR	Liberia	Mainland Africa	GDP|PPP	billion US$2005/yr	1.926	2.972	4.637	7.398	11.24	16.515	23.849	34.017	47.82	66.172	90.184	120.733	158.551	204.138	257.915	319.973	390.382	468.755
SSP3	LBR	Liberia	Mainland Africa	Population	million	3.994	4.83	5.691	6.563	7.477	8.401	9.341	10.301	11.27	12.22	13.144	14.034	14.874	15.66	16.389	17.023	17.561	18.009	18.376		SSP3	LBR	Liberia	Mainland Africa	GDP|PPP	billion US$2005/yr	1.926	2.955	4.462	6.597	9.101	11.935	15.306	19.387	24.275	30.055	36.84	44.655	53.5	63.352	74.143	85.714	98.02	110.975
SSP4	LBR	Liberia	Mainland Africa	Population	million	3.994	4.882	5.84	6.867	7.949	9.046	10.159	11.298	12.454	13.599	14.725	15.807	16.821	17.764	18.633	19.382	20.008	20.509	20.89		SSP4	LBR	Liberia	Mainland Africa	GDP|PPP	billion US$2005/yr	1.926	2.986	4.576	6.871	9.528	12.366	15.584	19.316	23.602	28.471	33.977	40.075	46.721	53.868	61.448	69.3	77.39	85.669
SSP5	LBR	Liberia	Mainland Africa	Population	million	3.994	4.842	5.724	6.65	7.543	8.417	9.255	10.033	10.735	11.35	11.875	12.287	12.58	12.755	12.812	12.763	12.614	12.376	12.056		SSP5	LBR	Liberia	Mainland Africa	GDP|PPP	billion US$2005/yr	1.926	2.962	4.793	8.606	15.666	28.343	48.823	79.992	124.548	184.792	262.714	358.52	470.797	596.874	735.161	882.605	1036.36	1193.9
SSP1	MDG	Madagascar	Madagascar	Population	million	20.714	23.337	25.921	28.387	30.643	32.729	34.563	36.098	37.333	38.329	39.093	39.626	39.92	39.97	39.776	39.338	38.66	37.762	36.669		SSP1	MDG	Madagascar	Madagascar	GDP|PPP	billion US$2005/yr	17.999	20.059	25.494	35.828	53.376	81.495	123.418	183.158	264.705	370.708	502.29	658.455	837.063	1033.23	1245.31	1467.25	1692.96	1917.33
SSP2	MDG	Madagascar	Madagascar	Population	million	20.714	23.728	26.869	30.055	33.27	36.427	39.502	42.411	45.111	47.646	49.986	52.086	53.956	55.585	56.896	57.876	58.533	58.93	59.054		SSP2	MDG	Madagascar	Madagascar	GDP|PPP	billion US$2005/yr	17.999	20.394	26.182	35.564	49.12	67.633	93.376	128.812	176.683	239.783	321.015	423.129	549.154	701.018	880.704	1089.5	1328.22	1596.87
SSP3	MDG	Madagascar	Madagascar	Population	million	20.714	23.816	27.383	31.287	35.415	39.586	43.814	48.163	52.62	57.049	61.427	65.717	69.938	74.079	78.073	81.891	85.525	88.979	92.267		SSP3	MDG	Madagascar	Madagascar	GDP|PPP	billion US$2005/yr	17.999	20.471	26.477	35.095	46.061	59.119	75.619	96.559	122.666	154.462	192.621	238.058	291.781	354.229	425.663	506.094	595.995	695.881
SSP4	MDG	Madagascar	Madagascar	Population	million	20.714	23.83	27.436	31.403	35.599	39.829	44.117	48.534	53.065	57.564	62.004	66.349	70.624	74.818	78.863	82.728	86.396	89.872	93.167		SSP4	MDG	Madagascar	Madagascar	GDP|PPP	billion US$2005/yr	17.999	20.482	26.448	34.654	44.685	55.578	68.609	84.378	103.14	124.938	149.984	178.603	211.2	247.763	288.203	332.357	380.481	432.975
SSP5	MDG	Madagascar	Madagascar	Population	million	20.714	23.336	25.915	28.371	30.616	32.687	34.503	36.018	37.232	38.206	38.947	39.46	39.737	39.774	39.57	39.126	38.448	37.551	36.465		SSP5	MDG	Madagascar	Madagascar	GDP|PPP	billion US$2005/yr	17.999	20.058	25.615	37.27	59.274	97.464	156.542	243.131	364.145	524.972	729.153	977.501	1269.28	1599.62	1968.57	2369.13	2793.62	3235.26
SSP1	MWI	Malawi	Mainland Africa	Population	million	14.901	17.087	19.45	21.877	24.288	26.763	29.193	31.486	33.583	35.487	37.182	38.678	39.948	40.977	41.77	42.334	42.675	42.794	42.692		SSP1	MWI	Malawi	Mainland Africa	GDP|PPP	billion US$2005/yr	11.854	15.061	20.813	30.64	46.974	73.415	113.895	173.505	258.178	373.542	524.57	714.377	943.954	1210.43	1511.66	1842.32	2195.72	2563.88
SSP2	MWI	Malawi	Mainland Africa	Population	million	14.901	17.309	20.02	22.991	26.228	29.67	33.269	36.916	40.541	44.027	47.383	50.586	53.577	56.369	58.948	61.289	63.344	65.162	66.731		SSP2	MWI	Malawi	Mainland Africa	GDP|PPP	billion US$2005/yr	11.854	15.257	20.976	29.445	41.371	57.617	80.413	112.336	156.572	217.041	298.262	405.631	544.911	721.484	940.869	1208.01	1526.91	1899.21
SSP3	MWI	Malawi	Mainland Africa	Population	million	14.901	17.407	20.359	23.773	27.732	32.139	37.019	42.355	48.037	53.906	59.906	65.996	72.105	78.256	84.345	90.344	96.278	102.08	107.779		SSP3	MWI	Malawi	Mainland Africa	GDP|PPP	billion US$2005/yr	11.854	15.343	21.205	29.014	38.805	50.395	65.132	84.106	108.361	139.175	177.947	226.344	285.918	358.017	443.674	543.923	660.068	792.674
SSP4	MWI	Malawi	Mainland Africa	Population	million	14.901	17.4	20.336	23.722	27.631	31.946	36.69	41.849	47.308	52.9	58.562	64.271	69.971	75.682	81.304	86.802	92.199	97.431	102.525		SSP4	MWI	Malawi	Mainland Africa	GDP|PPP	billion US$2005/yr	11.854	15.337	21.129	28.542	37.508	47.183	58.744	72.81	89.818	110.269	134.654	163.614	197.602	236.888	281.552	331.775	388.018	450.466
SSP5	MWI	Malawi	Mainland Africa	Population	million	14.901	17.082	19.426	21.813	24.171	26.574	28.912	31.091	33.053	34.805	36.33	37.663	38.782	39.677	40.358	40.836	41.117	41.202	41.093		SSP5	MWI	Malawi	Mainland Africa	GDP|PPP	billion US$2005/yr	11.854	15.056	20.867	31.606	51.484	86.452	142.146	226.484	348.843	518.56	744.51	1033.94	1391.52	1816.92	2311.55	2872.06	3492.93	4166.34
SSP1	MYS	Malaysia	Southeast Asia	Population	million	28.401	30.554	32.547	34.341	35.9	37.273	38.399	39.248	39.823	40.172	40.319	40.276	40.043	39.611	38.976	38.154	37.069	35.719	34.169		SSP1	MYS	Malaysia	Southeast Asia	GDP|PPP	billion US$2005/yr	375.288	473.023	595.358	750.517	941.212	1163.76	1398.23	1627.45	1853.73	2083.32	2310.05	2522.88	2715.66	2890.39	3047.03	3184.06	3297.97	3385.78
SSP2	MYS	Malaysia	Southeast Asia	Population	million	28.401	30.694	32.945	35.11	37.161	39.037	40.658	42.058	43.265	44.288	45.127	45.765	46.216	46.459	46.484	46.311	45.96	45.493	44.936		SSP2	MYS	Malaysia	Southeast Asia	GDP|PPP	billion US$2005/yr	375.288	475.181	599.206	742.319	903.265	1080.85	1273.88	1474.86	1683.41	1906.08	2139.6	2376.83	2616.04	2858.69	3099.52	3335.68	3565.91	3788.47
SSP3	MYS	Malaysia	Southeast Asia	Population	million	28.401	30.806	33.326	35.911	38.52	40.971	43.252	45.428	47.588	49.734	51.834	53.83	55.704	57.483	59.203	60.884	62.536	64.148	65.712		SSP3	MYS	Malaysia	Southeast Asia	GDP|PPP	billion US$2005/yr	375.288	476.924	602.209	732.864	864.718	997.569	1134.09	1267.41	1399.76	1541.45	1692.59	1851.13	2018.32	2197.24	2383.35	2572.84	2764.41	2957.85
SSP4	MYS	Malaysia	Southeast Asia	Population	million	28.401	30.558	32.575	34.398	35.971	37.331	38.414	39.196	39.689	39.941	39.971	39.774	39.345	38.688	37.819	36.776	35.593	34.299	32.934		SSP4	MYS	Malaysia	Southeast Asia	GDP|PPP	billion US$2005/yr	375.288	473.077	591.867	723.911	875.493	1040.73	1213.7	1383.64	1549.6	1721.22	1896.95	2067.07	2226.65	2377.11	2517.62	2646.24	2762.73	2866.33
SSP5	MYS	Malaysia	Southeast Asia	Population	million	28.401	30.57	32.596	34.441	36.049	37.471	38.648	39.548	40.173	40.57	40.759	40.747	40.537	40.12	39.492	38.669	37.576	36.212	34.643		SSP5	MYS	Malaysia	Southeast Asia	GDP|PPP	billion US$2005/yr	375.288	473.27	598.071	767.266	991.482	1267.06	1572.36	1893.96	2225.77	2576.09	2942.48	3312.75	3677.49	4038.04	4393.16	4739.33	5069.39	5376.09
SSP1	MLI	Mali	Mainland Africa	Population	million	15.37	17.491	19.618	21.741	23.741	25.691	27.473	29.036	30.353	31.451	32.344	33.068	33.619	33.989	34.178	34.197	34.052	33.746	33.287		SSP1	MLI	Mali	Mainland Africa	GDP|PPP	billion US$2005/yr	14.86	16.475	22.285	32.523	49.073	74.918	112.9	166.185	237.928	330.607	445.294	581.211	735.117	903.637	1084.88	1275.52	1471.18	1667.84
SSP2	MLI	Mali	Mainland Africa	Population	million	15.37	17.774	20.344	23.035	25.781	28.495	31.118	33.613	35.91	38.008	39.879	41.578	43.122	44.444	45.54	46.459	47.213	47.755	48.141		SSP2	MLI	Mali	Mainland Africa	GDP|PPP	billion US$2005/yr	14.86	16.742	22.314	30.608	42.271	58.035	79.674	109.002	148.148	199.424	265.112	347.561	448.739	570.324	713.877	880.809	1072.01	1288.07
SSP3	MLI	Mali	Mainland Africa	Population	million	15.37	17.99	20.93	24.139	27.643	31.244	34.847	38.449	41.967	45.326	48.506	51.533	54.341	57.002	59.433	61.647	63.637	65.398	66.955		SSP3	MLI	Mali	Mainland Africa	GDP|PPP	billion US$2005/yr	14.86	16.946	22.759	30.437	39.771	50.568	63.523	79.068	97.499	119.006	143.619	171.45	202.345	236.354	273.072	312.391	354.132	398.192
SSP4	MLI	Mali	Mainland Africa	Population	million	15.37	17.969	20.858	23.974	27.362	30.827	34.277	37.71	41.045	44.211	47.189	50.031	52.679	55.202	57.523	59.651	61.577	63.299	64.839		SSP4	MLI	Mali	Mainland Africa	GDP|PPP	billion US$2005/yr	14.86	16.926	22.668	30.11	38.826	48.148	58.688	70.63	83.999	98.717	114.59	131.575	149.435	168.137	187.375	207.143	227.44	248.36
SSP5	MLI	Mali	Mainland Africa	Population	million	15.37	17.468	19.542	21.569	23.455	25.274	26.905	28.298	29.429	30.332	31.021	31.56	31.951	32.187	32.275	32.224	32.041	31.729	31.297		SSP5	MLI	Mali	Mainland Africa	GDP|PPP	billion US$2005/yr	14.86	16.455	22.271	33.22	52.658	85.457	135.535	207.746	307.055	437.71	602.282	801.507	1032.69	1293.16	1582.95	1899.59	2239.15	2597.72
SSP1	MRT	Mauritania	Mainland Africa	Population	million	3.46	3.834	4.176	4.477	4.741	4.978	5.177	5.328	5.43	5.497	5.538	5.557	5.551	5.516	5.454	5.367	5.26	5.135	4.995		SSP1	MRT	Mauritania	Mainland Africa	GDP|PPP	billion US$2005/yr	7.624	9.936	13.068	17.188	22.937	30.696	40.495	52.6	67.055	83.667	102.208	122.161	142.729	163.305	183.88	204.052	223.579	242.067
SSP2	MRT	Mauritania	Mainland Africa	Population	million	3.46	3.87	4.269	4.652	5.026	5.388	5.722	6.014	6.271	6.498	6.701	6.873	7.015	7.131	7.219	7.28	7.319	7.332	7.322		SSP2	MRT	Mauritania	Mainland Africa	GDP|PPP	billion US$2005/yr	7.624	10.03	13.105	16.987	21.909	28.099	35.852	45.595	57.619	72.11	89.206	108.837	130.828	155.058	181.521	210.03	240.287	271.813
SSP3	MRT	Mauritania	Mainland Africa	Population	million	3.46	3.879	4.327	4.794	5.277	5.748	6.206	6.649	7.084	7.509	7.921	8.316	8.694	9.069	9.429	9.781	10.131	10.472	10.815		SSP3	MRT	Mauritania	Mainland Africa	GDP|PPP	billion US$2005/yr	7.624	10.053	13.133	16.698	20.629	25.004	30.037	35.95	42.793	50.548	59.195	68.739	79.139	90.481	102.704	115.699	129.439	143.882
SSP4	MRT	Mauritania	Mainland Africa	Population	million	3.46	3.883	4.338	4.816	5.31	5.79	6.258	6.709	7.151	7.585	8.004	8.404	8.786	9.163	9.523	9.873	10.217	10.55	10.879		SSP4	MRT	Mauritania	Mainland Africa	GDP|PPP	billion US$2005/yr	7.624	10.061	13.149	16.659	20.559	24.813	29.724	35.539	42.335	50.122	58.908	68.714	79.523	91.444	104.427	118.367	133.253	149.072
SSP5	MRT	Mauritania	Mainland Africa	Population	million	3.46	3.836	4.181	4.488	4.758	5.001	5.205	5.36	5.468	5.539	5.583	5.605	5.601	5.567	5.506	5.42	5.312	5.186	5.045		SSP5	MRT	Mauritania	Mainland Africa	GDP|PPP	billion US$2005/yr	7.624	9.94	13.134	17.682	24.546	34.349	47.142	63.46	83.607	107.6	135.411	166.604	200.297	235.756	273.03	311.604	351.145	391.034
SSP1	MEX	Mexico	Neotropics	Population	million	113.423	119.292	124.23	128.156	131.005	133.024	134.126	134.28	133.522	132.026	129.884	127.397	124.605	121.548	118.263	114.407	110.054	105.231	99.745		SSP1	MEX	Mexico	Neotropics	GDP|PPP	billion US$2005/yr	1409.69	1665.24	1946.47	2290.21	2721.74	3236.93	3793.24	4382.18	4993.56	5607.09	6205.25	6789.16	7332.76	7835.51	8306.6	8729.29	9098.23	9407.47
SSP2	MEX	Mexico	Neotropics	Population	million	113.423	119.973	126.183	131.812	136.747	140.908	144.298	146.898	148.719	149.772	150.033	149.955	149.685	149.196	148.421	147.341	145.998	144.559	143.066		SSP2	MEX	Mexico	Neotropics	GDP|PPP	billion US$2005/yr	1409.69	1674.74	1971.21	2303.64	2668.21	3059.46	3474.3	3923.81	4416.92	4948.7	5507.34	6107.38	6739.4	7408.33	8110.12	8840.49	9603.22	10400.5
SSP3	MEX	Mexico	Neotropics	Population	million	113.423	120.794	128.799	137.178	145.518	153.364	160.857	168.123	175.157	181.808	188.087	194.252	200.418	206.604	212.751	218.856	224.984	231.239	237.649		SSP3	MEX	Mexico	Neotropics	GDP|PPP	billion US$2005/yr	1409.69	1686.2	2003.38	2332.72	2653.06	2956.28	3240.54	3511.83	3785.06	4064.94	4346.62	4645.35	4956.04	5280.16	5606.53	5930.09	6253.8	6579.62
SSP4	MEX	Mexico	Neotropics	Population	million	113.423	119.459	124.818	129.188	132.429	134.75	136.061	136.337	135.602	134.044	131.782	129.127	126.13	122.833	119.269	115.446	111.403	107.188	102.885		SSP4	MEX	Mexico	Neotropics	GDP|PPP	billion US$2005/yr	1409.69	1667.56	1948.3	2251.88	2598.76	2971.87	3349.55	3733.06	4134.69	4553.56	4979.5	5415.28	5841.07	6258.61	6671.11	7072.44	7462.98	7841.75
SSP5	MEX	Mexico	Neotropics	Population	million	113.423	118.967	123.222	126.058	127.761	128.595	128.504	127.48	125.582	122.998	119.836	116.522	113.099	109.611	106.093	102.228	98.083	93.672	88.813		SSP5	MEX	Mexico	Neotropics	GDP|PPP	billion US$2005/yr	1409.69	1660.7	1935.7	2303.28	2818.03	3474.5	4196.4	4968.52	5785.35	6631.35	7484.05	8355.9	9216.79	10069.4	10932.4	11786.7	12625.8	13441.6
SSP1	MAR	Morocco	Mainland Africa	Population	million	31.951	33.181	34.094	34.687	34.947	34.991	34.834	34.474	33.899	33.14	32.217	31.215	30.152	29.037	27.874	26.68	25.478	24.29	23.042		SSP1	MAR	Morocco	Mainland Africa	GDP|PPP	billion US$2005/yr	137.293	170.461	224.444	301.042	403.647	534.432	685.827	847.529	1009.17	1166.7	1317.55	1462.52	1595.68	1711.7	1813.53	1902.37	1980.67	2050.66
SSP2	MAR	Morocco	Mainland Africa	Population	million	31.951	33.355	34.601	35.621	36.367	36.856	37.132	37.199	37.076	36.772	36.291	35.694	35.014	34.274	33.512	32.789	32.109	31.475	30.879		SSP2	MAR	Morocco	Mainland Africa	GDP|PPP	billion US$2005/yr	137.293	171.353	225.655	294.576	376.643	471.593	580.6	700.08	826.476	958.781	1095.93	1240.48	1390	1541.92	1695.31	1849.45	2004.57	2162.48
SSP3	MAR	Morocco	Mainland Africa	Population	million	31.951	33.701	35.644	37.674	39.546	41.14	42.51	43.81	45.108	46.347	47.469	48.45	49.336	50.235	51.261	52.469	53.834	55.296	56.81		SSP3	MAR	Morocco	Mainland Africa	GDP|PPP	billion US$2005/yr	137.293	173.13	229.157	292.295	357.58	422.199	489.512	557.103	623.929	689.115	753.807	820.887	891.474	965.945	1042.85	1121.25	1201.82	1286.05
SSP4	MAR	Morocco	Mainland Africa	Population	million	31.951	33.297	34.421	35.204	35.622	35.764	35.661	35.347	34.828	34.132	33.241	32.23	31.127	29.975	28.816	27.685	26.592	25.545	24.544		SSP4	MAR	Morocco	Mainland Africa	GDP|PPP	billion US$2005/yr	137.293	171.057	223.725	286.571	358.178	435.84	517.749	598.836	677.109	750.737	820.704	888.105	951.176	1008.32	1060.26	1107.67	1152.9	1197.91
SSP5	MAR	Morocco	Mainland Africa	Population	million	31.951	33.053	33.689	33.852	33.67	33.27	32.674	31.884	30.9	29.755	28.475	27.181	25.891	24.615	23.358	22.133	20.956	19.844	18.727		SSP5	MAR	Morocco	Mainland Africa	GDP|PPP	billion US$2005/yr	137.293	169.805	222.697	303.924	420.348	574.517	753.325	945.072	1138.21	1329.17	1515.79	1701.2	1878.28	2041.42	2196.15	2344.34	2490.48	2639.04
SSP1	MOZ	Mozambique	Mainland Africa	Population	million	23.391	25.63	27.857	30.022	31.969	33.765	35.306	36.575	37.606	38.44	39.081	39.528	39.76	39.767	39.557	39.128	38.486	37.642	36.623		SSP1	MOZ	Mozambique	Mainland Africa	GDP|PPP	billion US$2005/yr	19.244	27.351	39.304	57.507	85.732	128.69	191.293	279.991	400.98	558.977	756.764	993.203	1264.15	1564.39	1890.63	2233.93	2584.16	2932.37
SSP2	MOZ	Mozambique	Mainland Africa	Population	million	23.391	25.991	28.638	31.263	33.801	36.212	38.469	40.492	42.293	43.911	45.387	46.69	47.774	48.672	49.385	49.881	50.161	50.245	50.194		SSP2	MOZ	Mozambique	Mainland Africa	GDP|PPP	billion US$2005/yr	19.244	27.736	39.953	55.859	75.961	101.022	134.025	177.98	235.934	311.159	407.125	527.298	675.099	854.217	1068.7	1321.48	1614.31	1948.25
SSP3	MOZ	Mozambique	Mainland Africa	Population	million	23.391	26.099	28.973	31.997	35.199	38.253	41.194	44.032	46.765	49.46	52.006	54.292	56.515	58.553	60.527	62.39	64.126	65.782	67.369		SSP3	MOZ	Mozambique	Mainland Africa	GDP|PPP	billion US$2005/yr	19.244	27.851	40.039	53.995	68.76	83.573	100.432	120.376	143.52	170.187	200.43	234.101	271.945	313.887	360.117	410.672	465.627	525.49
SSP4	MOZ	Mozambique	Mainland Africa	Population	million	23.391	26.098	28.97	31.98	35.15	38.157	41.044	43.827	46.5	49.126	51.593	53.805	55.96	57.938	59.853	61.655	63.327	64.912	66.421		SSP4	MOZ	Mozambique	Mainland Africa	GDP|PPP	billion US$2005/yr	19.244	27.851	39.959	53.376	66.803	78.704	91.251	105.208	120.416	136.915	154.553	173.1	193.012	214.129	236.533	260.259	285.44	312.519
SSP5	MOZ	Mozambique	Mainland Africa	Population	million	23.391	25.625	27.839	29.974	31.875	33.615	35.092	36.293	37.254	38.015	38.582	38.969	39.152	39.123	38.888	38.446	37.802	36.965	35.96		SSP5	MOZ	Mozambique	Mainland Africa	GDP|PPP	billion US$2005/yr	19.244	27.346	39.459	59.553	94.218	151.51	238.128	364.126	539.76	773.784	1072.85	1438.95	1869.86	2361.74	2913.98	3516.95	4158.31	4826.34
SSP1	MMR	Myanmar	Southeast Asia	Population	million	47.963	48.944	49.47	49.621	49.283	48.608	47.612	46.29	44.733	42.997	41.14	39.24	37.332	35.416	33.5	31.61	29.773	28.018	26.365		SSP1	MMR	Myanmar	Southeast Asia	GDP|PPP	billion US$2005/yr	69.159	91.511	122.894	163.143	214.431	277.17	347.942	424.13	501.736	578.374	652.3	721.62	785.49	841.648	892.353	937.363	977.624	1013.62
SSP2	MMR	Myanmar	Southeast Asia	Population	million	47.963	49.194	50.163	50.773	51.096	50.975	50.515	49.695	48.628	47.391	46.031	44.634	43.242	41.891	40.599	39.413	38.334	37.36	36.467		SSP2	MMR	Myanmar	Southeast Asia	GDP|PPP	billion US$2005/yr	69.159	91.977	123.458	156.108	187.778	216.349	245.113	274.625	304.433	334.804	366.171	398.915	434.009	471.223	511.214	554.24	600.348	649.789
SSP3	MMR	Myanmar	Southeast Asia	Population	million	47.963	49.443	50.922	52.353	53.535	54.196	54.501	54.5	54.438	54.26	54.099	53.874	53.73	53.669	53.789	54.196	54.745	55.499	56.383		SSP3	MMR	Myanmar	Southeast Asia	GDP|PPP	billion US$2005/yr	69.159	92.444	124.57	154.806	179.151	194.731	206.911	216.77	224.201	229.768	234.483	238.996	244.186	249.875	256.038	262.657	269.763	278.003
SSP4	MMR	Myanmar	Southeast Asia	Population	million	47.963	48.985	49.71	49.941	49.735	49.042	48.009	46.57	44.874	42.968	40.915	38.812	36.728	34.706	32.762	30.941	29.243	27.679	26.24		SSP4	MMR	Myanmar	Southeast Asia	GDP|PPP	billion US$2005/yr	69.159	91.587	121.608	147.717	165.681	171.004	170.326	165.278	156.671	145.814	133.815	121.29	108.856	96.744	85.378	74.826	65.216	56.605
SSP5	MMR	Myanmar	Southeast Asia	Population	million	47.963	48.855	49.197	49.074	48.465	47.53	46.293	44.752	42.999	41.087	39.074	37.06	35.076	33.121	31.199	29.331	27.54	25.85	24.278		SSP5	MMR	Myanmar	Southeast Asia	GDP|PPP	billion US$2005/yr	69.159	91.344	122.933	168.89	235.433	323.672	424.794	534.778	648.253	762.331	875.118	984.672	1089.96	1188.31	1283.41	1375.43	1466.13	1556.57
SSP1	NAM	Namibia	Mainland Africa	Population	million	2.283	2.454	2.615	2.758	2.879	2.984	3.069	3.133	3.177	3.203	3.213	3.206	3.181	3.138	3.076	2.998	2.906	2.803	2.692		SSP1	NAM	Namibia	Mainland Africa	GDP|PPP	billion US$2005/yr	13.403	16.166	20.028	25.491	32.724	41.408	51.233	61.94	73.161	84.541	95.782	106.583	116.627	125.78	134.27	141.795	148.356	153.95
SSP2	NAM	Namibia	Mainland Africa	Population	million	2.283	2.47	2.641	2.802	2.946	3.074	3.181	3.269	3.343	3.401	3.448	3.479	3.494	3.495	3.481	3.453	3.415	3.364	3.309		SSP2	NAM	Namibia	Mainland Africa	GDP|PPP	billion US$2005/yr	13.403	16.272	20.147	25.135	31.085	37.651	44.952	52.985	61.692	70.963	80.703	90.859	101.358	112.082	123.01	133.952	144.785	155.551
SSP3	NAM	Namibia	Mainland Africa	Population	million	2.283	2.475	2.658	2.841	3.02	3.18	3.324	3.458	3.586	3.707	3.819	3.917	4.01	4.091	4.174	4.253	4.323	4.397	4.471		SSP3	NAM	Namibia	Mainland Africa	GDP|PPP	billion US$2005/yr	13.403	16.302	20.154	24.617	29.318	33.869	38.555	43.406	48.424	53.498	58.58	63.667	68.913	74.178	79.602	85.14	90.752	96.612
SSP4	NAM	Namibia	Mainland Africa	Population	million	2.283	2.475	2.66	2.844	3.022	3.178	3.315	3.441	3.56	3.67	3.767	3.849	3.923	3.983	4.043	4.096	4.138	4.179	4.216		SSP4	NAM	Namibia	Mainland Africa	GDP|PPP	billion US$2005/yr	13.403	16.304	20.203	24.848	30.293	36.14	42.61	49.769	57.667	66.186	75.27	84.915	95.35	106.401	118.259	130.842	144.092	158.315
SSP5	NAM	Namibia	Mainland Africa	Population	million	2.283	2.454	2.613	2.754	2.872	2.975	3.058	3.119	3.162	3.186	3.194	3.185	3.16	3.116	3.054	2.976	2.885	2.782	2.672		SSP5	NAM	Namibia	Mainland Africa	GDP|PPP	billion US$2005/yr	13.403	16.164	20.071	26.011	34.548	45.523	58.397	72.928	88.756	105.525	122.931	140.63	158.202	175.424	192.58	209.199	225.215	240.537
SSP1	NPL	Nepal	South Asia	Population	million	29.959	32.494	34.907	37.114	39.016	40.683	42.093	43.225	44.054	44.585	44.806	44.735	44.381	43.75	42.849	41.694	40.312	38.745	36.968		SSP1	NPL	Nepal	South Asia	GDP|PPP	billion US$2005/yr	32.337	39.154	49.768	67.559	95.617	137.762	197.306	277.52	380.174	505.182	650.733	813.357	989.531	1176.11	1366.88	1555.81	1737.38	1908.63
SSP2	NPL	Nepal	South Asia	Population	million	29.959	32.808	35.756	38.621	41.272	43.764	46.105	48.252	50.142	51.743	53	53.9	54.485	54.778	54.757	54.454	53.902	53.206	52.407		SSP2	NPL	Nepal	South Asia	GDP|PPP	billion US$2005/yr	32.337	39.533	50.058	65.31	85.289	110.208	142.72	184.59	237.576	303.124	382.88	478.399	591.586	724.177	874.609	1041.95	1225.87	1426.56
SSP3	NPL	Nepal	South Asia	Population	million	29.959	33.131	36.817	40.707	44.648	48.55	52.562	56.714	60.91	64.964	68.807	72.469	76.005	79.436	82.754	85.972	89.139	92.297	95.442		SSP3	NPL	Nepal	South Asia	GDP|PPP	billion US$2005/yr	32.337	39.922	50.632	63.722	78.554	94.113	112.103	132.888	156.731	183.837	214.749	250.175	291.121	338.479	391.518	450.649	517.072	591.83
SSP4	NPL	Nepal	South Asia	Population	million	29.959	33.125	36.796	40.638	44.506	48.309	52.203	56.215	60.243	64.097	67.712	71.145	74.455	77.665	80.767	83.771	86.722	89.654	92.561		SSP4	NPL	Nepal	South Asia	GDP|PPP	billion US$2005/yr	32.337	39.914	50.526	62.961	76.379	88.671	101.623	115.303	129.646	144.626	160.45	177.407	195.951	216.399	238.088	261.22	286.473	314.436
SSP5	NPL	Nepal	South Asia	Population	million	29.959	32.473	34.834	36.946	38.738	40.288	41.575	42.579	43.277	43.679	43.776	43.6	43.16	42.467	41.528	40.36	38.988	37.453	35.73		SSP5	NPL	Nepal	South Asia	GDP|PPP	billion US$2005/yr	32.337	39.129	49.844	69.612	104.739	162.535	247.429	364.994	518.696	709.348	935.381	1193.27	1479.34	1790.64	2120.13	2460.03	2802.85	3144.78
SSP1	NIC	Nicaragua	Neotropics	Population	million	5.788	6.052	6.235	6.349	6.4	6.403	6.36	6.273	6.147	5.993	5.816	5.638	5.46	5.279	5.093	4.903	4.709	4.504	4.286		SSP1	NIC	Nicaragua	Neotropics	GDP|PPP	billion US$2005/yr	14.467	17.204	20.776	27.092	36.746	50.16	67.175	87.181	109.539	133.736	158.676	184.273	209.768	234.405	258.619	282.077	304.437	325.3
SSP2	NIC	Nicaragua	Neotropics	Population	million	5.788	6.102	6.366	6.581	6.754	6.885	6.969	7.011	7.014	6.976	6.903	6.827	6.75	6.671	6.588	6.5	6.411	6.322	6.244		SSP2	NIC	Nicaragua	Neotropics	GDP|PPP	billion US$2005/yr	14.467	17.344	21.08	26.924	34.686	44.298	56.034	69.856	85.863	104.133	124.391	147.145	172.438	200.047	230.004	262.368	297.19	334.411
SSP3	NIC	Nicaragua	Neotropics	Population	million	5.788	6.188	6.639	7.121	7.595	8.046	8.476	8.887	9.277	9.64	9.975	10.303	10.627	10.945	11.259	11.57	11.881	12.195	12.514		SSP3	NIC	Nicaragua	Neotropics	GDP|PPP	billion US$2005/yr	14.467	17.591	21.778	27.608	34.465	41.984	50.44	59.72	69.85	80.954	93.029	106.479	121.397	137.691	155.251	174.014	194.216	215.971
SSP4	NIC	Nicaragua	Neotropics	Population	million	5.788	6.086	6.333	6.507	6.607	6.656	6.653	6.599	6.499	6.366	6.202	6.033	5.858	5.677	5.489	5.296	5.1	4.903	4.708		SSP4	NIC	Nicaragua	Neotropics	GDP|PPP	billion US$2005/yr	14.467	17.301	20.811	25.532	30.866	35.965	41.069	45.916	50.471	54.789	58.708	62.379	65.735	68.688	71.31	73.616	75.724	77.691
SSP5	NIC	Nicaragua	Neotropics	Population	million	5.788	6.014	6.112	6.094	6.006	5.868	5.682	5.454	5.193	4.912	4.618	4.346	4.096	3.866	3.654	3.458	3.279	3.108	2.944		SSP5	NIC	Nicaragua	Neotropics	GDP|PPP	billion US$2005/yr	14.467	17.095	20.421	26.765	37.238	52.373	71.377	93.377	117.508	143.171	169.075	195.653	222.201	248.439	275.834	304.182	333.749	364.656
SSP1	NER	Niger	Mainland Africa	Population	million	15.512	18.113	20.881	23.785	26.746	29.862	32.975	35.97	38.749	41.321	43.645	45.722	47.52	49.011	50.185	51.044	51.604	51.879	51.878		SSP1	NER	Niger	Mainland Africa	GDP|PPP	billion US$2005/yr	10.085	14.142	18.914	27.191	41.082	63.837	99.438	153.127	231.559	341.796	490.506	683.201	923.13	1210.69	1545.64	1924.05	2339.17	2782.89
SSP2	NER	Niger	Mainland Africa	Population	million	15.512	18.451	21.816	25.593	29.816	34.527	39.681	45.194	50.943	56.568	62.027	67.453	72.789	77.923	82.672	87.046	91.055	94.682	97.906		SSP2	NER	Niger	Mainland Africa	GDP|PPP	billion US$2005/yr	10.085	14.406	19.323	26.492	36.765	51.158	72.001	102.233	146.041	208.906	297.737	420.987	587.438	806	1085.78	1436.45	1867.51	2385.78
SSP3	NER	Niger	Mainland Africa	Population	million	15.512	18.593	22.413	27.05	32.577	38.94	46.265	54.587	63.821	73.687	83.939	94.419	105.193	116.044	127.013	137.872	148.38	158.655	168.308		SSP3	NER	Niger	Mainland Africa	GDP|PPP	billion US$2005/yr	10.085	14.517	19.627	26.245	34.607	44.783	57.989	75.254	97.681	126.616	163.571	210.231	268.398	339.321	424.256	524.203	639.739	771.872
SSP4	NER	Niger	Mainland Africa	Population	million	15.512	18.585	22.385	26.981	32.446	38.725	45.943	54.133	63.203	72.872	82.893	93.134	103.666	114.282	125.025	135.67	145.984	156.082	165.586		SSP4	NER	Niger	Mainland Africa	GDP|PPP	billion US$2005/yr	10.085	14.511	19.584	26.002	33.774	42.45	53.044	66.115	82.125	101.608	125.084	153.106	186.181	224.38	267.828	316.589	370.619	430.312
SSP5	NER	Niger	Mainland Africa	Population	million	15.512	18.105	20.853	23.713	26.614	29.654	32.669	35.544	38.182	40.592	42.736	44.638	46.272	47.618	48.669	49.434	49.931	50.178	50.186		SSP5	NER	Niger	Mainland Africa	GDP|PPP	billion US$2005/yr	10.085	14.136	18.946	27.921	44.547	74.09	122.282	197.237	309.343	470.034	690.774	982.512	1353.72	1809.56	2355.45	2991.71	3714.71	4518.64
SSP1	NGA	Nigeria	Mainland Africa	Population	million	158.423	177.415	197.847	219.21	240.767	263.248	285.959	307.982	328.589	347.62	364.877	380.369	393.875	405.237	414.405	421.454	426.454	429.477	430.54		SSP1	NGA	Nigeria	Mainland Africa	GDP|PPP	billion US$2005/yr	338.225	462.557	636.006	896.583	1290.38	1853.29	2634.13	3681.43	5040	6755.19	8860.88	11359.8	14217.6	17383.4	20817.4	24449	28200	31996.1
SSP2	NGA	Nigeria	Mainland Africa	Population	million	158.423	178.837	201.529	226.154	252.724	281.018	310.622	340.948	371.695	400.339	427.389	453.406	477.965	500.558	521.278	539.736	555.753	569.895	582.38		SSP2	NGA	Nigeria	Mainland Africa	GDP|PPP	billion US$2005/yr	338.225	466.265	642.968	880.184	1192.73	1592.47	2117.56	2805.84	3701.92	4860.51	6331.15	8158.04	10377.8	13013.4	16069.8	19545.2	23435.7	27710
SSP3	NGA	Nigeria	Mainland Africa	Population	million	158.423	180.443	205.735	234.74	268.276	305.148	345.292	388.27	433.684	479.538	525.149	570.459	614.306	657.998	699.857	741.118	780.003	817.671	853.597		SSP3	NGA	Nigeria	Mainland Africa	GDP|PPP	billion US$2005/yr	338.225	470.453	651.218	871.104	1131.59	1422.88	1757.6	2144.59	2601.8	3152.72	3815.1	4603.52	5530.63	6619.27	7863.84	9265.88	10809.8	12489.6
SSP4	NGA	Nigeria	Mainland Africa	Population	million	158.423	180.398	205.616	234.536	267.934	304.504	344.175	386.517	431.132	476.004	520.41	564.327	606.617	648.579	688.558	727.735	764.343	799.48	832.629		SSP4	NGA	Nigeria	Mainland Africa	GDP|PPP	billion US$2005/yr	338.225	470.333	649.365	859.062	1100.24	1351.46	1626.4	1930.24	2275.96	2679.34	3148.24	3685.96	4298.23	4998.46	5778.26	6637.62	7563.98	8555.11
SSP5	NGA	Nigeria	Mainland Africa	Population	million	158.423	177.351	197.63	218.73	239.977	262.101	284.396	305.943	326.018	344.466	361.099	375.996	388.953	399.827	408.585	415.313	420.088	422.991	424.04		SSP5	NGA	Nigeria	Mainland Africa	GDP|PPP	billion US$2005/yr	338.225	462.39	638.004	924.894	1400.57	2142.16	3191.68	4616.39	6494.05	8914.03	11957.2	15670.1	20057	25104.9	30814.6	37134.8	43995.1	51320.7
SSP1	PAK	Pakistan	South Asia	Population	million	173.593	188.197	202.269	214.784	225.226	234.342	242.043	248.078	252.222	254.627	255.356	254.687	252.655	249.253	244.545	238.698	231.953	224.54	216.638		SSP1	PAK	Pakistan	South Asia	GDP|PPP	billion US$2005/yr	418.508	487.451	593.459	763.789	1017.29	1377.05	1851.66	2441.83	3134.43	3921.3	4789.47	5723.2	6704.03	7683.78	8646.42	9573.42	10456.3	11293.4
SSP2	PAK	Pakistan	South Asia	Population	million	173.593	190.015	207.341	224.144	239.684	254.203	267.979	280.898	292.577	302.301	310.048	316.184	320.897	324.545	326.985	328.462	328.66	327.939	326.374		SSP2	PAK	Pakistan	South Asia	GDP|PPP	billion US$2005/yr	418.508	492.16	603.664	761.816	967.874	1230.31	1565.23	1979.79	2479.51	3073.55	3773.76	4593.54	5542.45	6606.07	7770.17	9026.42	10374.2	11814.6
SSP3	PAK	Pakistan	South Asia	Population	million	173.593	191.535	212.332	234.369	256.606	278.293	300.368	323.436	347.138	370.239	391.963	412.638	432.943	453.274	473.703	493.954	513.592	532.592	551.068		SSP3	PAK	Pakistan	South Asia	GDP|PPP	billion US$2005/yr	418.508	496.098	612.85	756.619	915.845	1090.21	1290.5	1514.67	1759.88	2029.38	2329.77	2669.78	3056.65	3484.72	3947.36	4442.54	4976.32	5555.9
SSP4	PAK	Pakistan	South Asia	Population	million	173.593	191.254	211.598	232.886	254.264	274.987	295.99	317.853	340.2	361.817	381.963	401.119	419.977	438.929	458.035	477.015	495.444	513.3	530.689		SSP4	PAK	Pakistan	South Asia	GDP|PPP	billion US$2005/yr	418.508	495.368	609.89	745.903	891.682	1038.66	1199.97	1372.88	1553.99	1745.39	1951.11	2176.49	2426.57	2695.78	2978.75	3275.77	3592.03	3934.15
SSP5	PAK	Pakistan	South Asia	Population	million	173.593	187.909	201.497	213.222	222.815	231.044	237.798	242.835	245.972	247.395	247.183	245.714	243.028	239.133	234.104	228.109	221.376	214.122	206.518		SSP5	PAK	Pakistan	South Asia	GDP|PPP	billion US$2005/yr	418.508	486.705	591.922	775.634	1075.08	1529.32	2146.86	2936.72	3889.69	5002.76	6267.16	7672.22	9200.89	10797	12449.1	14135.2	15847.2	17587.5
SSP1	PAN	Panama	Neotropics	Population	million	3.517	3.753	3.965	4.151	4.308	4.439	4.54	4.608	4.645	4.654	4.636	4.592	4.525	4.436	4.327	4.188	4.022	3.834	3.622		SSP1	PAN	Panama	Neotropics	GDP|PPP	billion US$2005/yr	44.448	64.525	85.061	109.253	136.631	166.417	197.139	227.99	257.626	285.333	310.64	332.559	350.672	365.248	377.696	387.036	393.121	396.068
SSP2	PAN	Panama	Neotropics	Population	million	3.517	3.776	4.022	4.257	4.477	4.672	4.846	4.991	5.108	5.199	5.263	5.305	5.324	5.319	5.294	5.248	5.187	5.112	5.025		SSP2	PAN	Panama	Neotropics	GDP|PPP	billion US$2005/yr	44.448	64.91	85.949	109.171	133.197	157.894	183.68	210.613	238.213	266.165	294.31	322.008	348.953	375.062	400.585	425.15	448.453	470.293
SSP3	PAN	Panama	Neotropics	Population	million	3.517	3.788	4.069	4.354	4.641	4.912	5.17	5.418	5.659	5.887	6.102	6.306	6.503	6.694	6.878	7.055	7.228	7.4	7.571		SSP3	PAN	Panama	Neotropics	GDP|PPP	billion US$2005/yr	44.448	65.12	86.439	107.984	128.046	146.562	164.674	182.739	200.617	218.271	235.871	253.41	271.2	289.395	307.853	326.179	344.484	362.927
SSP4	PAN	Panama	Neotropics	Population	million	3.517	3.76	3.986	4.189	4.358	4.498	4.605	4.676	4.711	4.714	4.688	4.632	4.551	4.445	4.318	4.173	4.014	3.843	3.663		SSP4	PAN	Panama	Neotropics	GDP|PPP	billion US$2005/yr	44.448	64.64	85.071	106.756	129.042	151.141	173.003	194.419	214.857	234.115	252.139	268.102	281.739	293.187	303.211	311.3	317.621	322.42
SSP5	PAN	Panama	Neotropics	Population	million	3.517	3.755	3.97	4.161	4.321	4.455	4.558	4.63	4.67	4.682	4.666	4.624	4.557	4.468	4.358	4.217	4.048	3.858	3.644		SSP5	PAN	Panama	Neotropics	GDP|PPP	billion US$2005/yr	44.448	64.557	85.495	112.109	144.938	183.177	224.239	267.278	310.82	354.061	396.478	436.752	473.999	508.118	540.696	570.211	596.199	618.498
SSP1	PRY	Paraguay	Neotropics	Population	million	6.455	6.93	7.351	7.714	8.011	8.258	8.448	8.577	8.65	8.674	8.653	8.592	8.493	8.354	8.175	7.959	7.71	7.435	7.118		SSP1	PRY	Paraguay	Neotropics	GDP|PPP	billion US$2005/yr	30.001	36.849	46.173	60.969	82.27	110.602	145.259	185.206	228.926	275.504	323.621	371.941	419.025	463.584	506.044	545.338	581.062	613.145
SSP2	PRY	Paraguay	Neotropics	Population	million	6.455	6.986	7.502	7.985	8.427	8.83	9.19	9.499	9.757	9.967	10.122	10.232	10.301	10.33	10.321	10.275	10.195	10.086	9.954		SSP2	PRY	Paraguay	Neotropics	GDP|PPP	billion US$2005/yr	30.001	37.146	46.722	60.084	77.042	97.428	121.946	150.506	183.047	219.732	260.446	305.056	353.293	404.646	458.697	514.787	572.731	632.364
SSP3	PRY	Paraguay	Neotropics	Population	million	6.455	7.032	7.655	8.3	8.942	9.555	10.149	10.734	11.309	11.858	12.376	12.868	13.338	13.797	14.246	14.685	15.117	15.537	15.944		SSP3	PRY	Paraguay	Neotropics	GDP|PPP	billion US$2005/yr	30.001	37.391	47.285	59.593	73.497	88.396	104.907	122.868	142.115	162.711	184.682	208.16	233.31	260.144	288.434	317.99	349.123	382.071
SSP4	PRY	Paraguay	Neotropics	Population	million	6.455	7.025	7.632	8.251	8.861	9.437	9.991	10.533	11.059	11.557	12.02	12.458	12.877	13.289	13.693	14.092	14.484	14.867	15.239		SSP4	PRY	Paraguay	Neotropics	GDP|PPP	billion US$2005/yr	30.001	37.353	47.345	60.409	77.089	97.199	121.165	149.01	180.845	217.066	257.985	303.981	355.621	413.288	476.954	546.632	623.136	707.273
SSP5	PRY	Paraguay	Neotropics	Population	million	6.455	6.922	7.325	7.659	7.924	8.137	8.292	8.386	8.425	8.415	8.362	8.274	8.154	7.999	7.809	7.588	7.34	7.071	6.766		SSP5	PRY	Paraguay	Neotropics	GDP|PPP	billion US$2005/yr	30.001	36.806	46.284	62.749	88.543	124.89	170.337	223.9	284.041	349.971	420.38	493.987	569.115	644.181	720.035	795.171	868.984	941.306
SSP1	PER	Peru	Neotropics	Population	million	29.077	30.185	30.975	31.489	31.74	31.804	31.669	31.326	30.789	30.096	29.268	28.391	27.476	26.524	25.544	24.538	23.516	22.411	21.246		SSP1	PER	Peru	Neotropics	GDP|PPP	billion US$2005/yr	248.847	329.29	428.611	549.194	692.033	854.21	1025.12	1196.23	1361.75	1518.61	1661.65	1791.31	1905.82	2003.24	2088.34	2161.01	2221.5	2266.69
SSP2	PER	Peru	Neotropics	Population	million	29.077	30.365	31.439	32.329	33.041	33.541	33.849	33.957	33.862	33.573	33.116	32.623	32.106	31.564	30.994	30.401	29.803	29.237	28.713		SSP2	PER	Peru	Neotropics	GDP|PPP	billion US$2005/yr	248.847	331.247	432.163	541.933	653.711	766.083	883.488	1004.65	1129.38	1256.21	1381.99	1509.04	1637.56	1766.28	1895.68	2026.38	2158.5	2291.9
SSP3	PER	Peru	Neotropics	Population	million	29.077	30.653	32.363	34.167	35.93	37.54	38.998	40.333	41.558	42.659	43.652	44.592	45.488	46.355	47.205	48.055	48.918	49.811	50.741		SSP3	PER	Peru	Neotropics	GDP|PPP	billion US$2005/yr	248.847	334.393	441.714	549.923	648.638	734.772	819.033	902.024	984.796	1067.92	1150.9	1236.59	1326.46	1420.94	1519.23	1620.56	1725.81	1835.41
SSP4	PER	Peru	Neotropics	Population	million	29.077	30.266	31.207	31.863	32.227	32.368	32.29	31.977	31.444	30.737	29.878	28.956	27.988	26.983	25.955	24.91	23.864	22.831	21.824		SSP4	PER	Peru	Neotropics	GDP|PPP	billion US$2005/yr	248.847	330.165	428.672	532.004	639.229	745.626	853.139	959.057	1063.38	1165.53	1262.64	1354.67	1441.03	1520.74	1595.45	1664.62	1729.17	1789.7
SSP5	PER	Peru	Neotropics	Population	million	29.077	30.051	30.553	30.617	30.396	29.981	29.366	28.556	27.57	26.45	25.22	24.011	22.835	21.695	20.597	19.543	18.537	17.521	16.51		SSP5	PER	Peru	Neotropics	GDP|PPP	billion US$2005/yr	248.847	327.823	425.112	552.118	716.672	911.145	1114.09	1315.89	1510.8	1696.93	1869.27	2031.21	2180.54	2316.05	2446.12	2571.43	2693.65	2809.78
SSP1	PHL	Philippines	Southeast Asia	Population	million	93.261	100.611	107.699	114.053	119.468	124.146	127.941	130.792	132.728	133.923	134.419	134.256	133.428	131.917	129.745	126.96	123.629	119.85	115.697		SSP1	PHL	Philippines	Southeast Asia	GDP|PPP	billion US$2005/yr	332.055	413.788	521.994	668.807	871.821	1139.86	1477.34	1879.9	2340.08	2850.49	3399.4	3969.55	4540.92	5104.79	5656.98	6184.63	6677.66	7131.26
SSP2	PHL	Philippines	Southeast Asia	Population	million	93.261	101.325	109.705	117.823	125.356	132.321	138.617	144.218	149.04	153.215	156.742	159.523	161.592	162.875	163.485	163.466	162.876	161.764	160.179		SSP2	PHL	Philippines	Southeast Asia	GDP|PPP	billion US$2005/yr	332.055	416.722	528.14	661.231	818.91	1000.37	1222.57	1489.05	1802.91	2166.58	2581.16	3044.87	3555.2	4113.89	4716.78	5357.66	6029.68	6729.75
SSP3	PHL	Philippines	Southeast Asia	Population	million	93.261	102.087	112.048	122.523	133.169	143.42	153.437	163.432	173.52	183.359	192.829	201.887	210.579	218.923	226.945	234.631	241.955	248.863	255.277		SSP3	PHL	Philippines	Southeast Asia	GDP|PPP	billion US$2005/yr	332.055	419.859	535.44	657.632	783.475	906.961	1047.77	1207.88	1388.72	1592.52	1821.74	2079.18	2367.28	2690.25	3044.54	3426.88	3838.23	4280
SSP4	PHL	Philippines	Southeast Asia	Population	million	93.261	101.973	111.857	122.196	132.648	142.633	152.33	161.969	171.67	181.082	190.089	198.706	206.998	215.001	222.747	230.214	237.362	244.124	250.419		SSP4	PHL	Philippines	Southeast Asia	GDP|PPP	billion US$2005/yr	332.055	419.387	533.031	645.294	755.582	850.572	953.109	1064.86	1186.83	1319.7	1463.7	1619.15	1787.46	1970.76	2165.76	2371.1	2587.62	2817.37
SSP5	PHL	Philippines	Southeast Asia	Population	million	93.261	100.481	107.437	113.552	118.67	123.018	126.457	128.939	130.499	131.315	131.435	130.94	129.832	128.097	125.762	122.876	119.505	115.749	111.675		SSP5	PHL	Philippines	Southeast Asia	GDP|PPP	billion US$2005/yr	332.055	413.255	522.908	687.896	940.124	1296.08	1753.32	2311.03	2963.72	3707.16	4531.9	5421.16	6350.68	7312.09	8305.03	9314.16	10326.6	11335.6
SSP1	RWA	Rwanda	Mainland Africa	Population	million	10.624	12.019	13.376	14.639	15.813	16.988	18.123	19.136	19.982	20.676	21.244	21.715	22.079	22.318	22.431	22.434	22.336	22.14	21.839		SSP1	RWA	Rwanda	Mainland Africa	GDP|PPP	billion US$2005/yr	11.057	15.588	21.72	31.635	46.865	69.449	100.651	141.665	193.498	257.445	334.865	424.639	524.802	631.154	743.125	859.408	978.318	1097.09
SSP2	RWA	Rwanda	Mainland Africa	Population	million	10.624	12.167	13.749	15.293	16.827	18.394	19.98	21.519	22.953	24.219	25.345	26.395	27.374	28.26	29.027	29.671	30.186	30.596	30.884		SSP2	RWA	Rwanda	Mainland Africa	GDP|PPP	billion US$2005/yr	11.057	15.78	22.017	30.896	42.639	57.661	77.102	101.893	133.066	172.205	221.215	281.119	352.748	436.124	532.159	641.89	766.458	905.738
SSP3	RWA	Rwanda	Mainland Africa	Population	million	10.624	12.279	14.042	15.849	17.769	19.764	21.877	24.035	26.177	28.235	30.18	32.12	34.02	35.876	37.648	39.311	40.864	42.316	43.676		SSP3	RWA	Rwanda	Mainland Africa	GDP|PPP	billion US$2005/yr	11.057	15.925	22.27	29.97	38.695	47.983	58.621	70.776	84.64	100.801	119.811	141.854	166.935	194.836	225.513	259.002	295.446	334.669
SSP4	RWA	Rwanda	Mainland Africa	Population	million	10.624	12.281	14.048	15.855	17.768	19.745	21.824	23.94	26.033	28.036	29.918	31.794	33.633	35.432	37.152	38.77	40.281	41.692	43.013		SSP4	RWA	Rwanda	Mainland Africa	GDP|PPP	billion US$2005/yr	11.057	15.927	22.225	29.559	37.473	45.069	53.247	62.11	71.771	82.603	94.847	108.458	123.334	139.219	156.025	173.849	192.791	212.815
SSP5	RWA	Rwanda	Mainland Africa	Population	million	10.624	12.019	13.375	14.629	15.788	16.939	18.039	19.008	19.804	20.444	20.952	21.369	21.683	21.882	21.964	21.945	21.833	21.63	21.332		SSP5	RWA	Rwanda	Mainland Africa	GDP|PPP	billion US$2005/yr	11.057	15.588	21.839	32.892	51.569	81.215	123.303	179.864	252.803	344.69	458.483	594.234	750.624	923.321	1113.14	1319.65	1541.86	1776.96
SSP1	SAU	Saudi Arabia	South Asia	Population	million	27.448	30.915	34.274	37.433	40.373	43.193	45.787	48.023	49.823	51.222	52.238	52.811	52.95	52.676	52.042	51.109	49.925	48.374	46.472		SSP1	SAU	Saudi Arabia	South Asia	GDP|PPP	billion US$2005/yr	563.632	728.092	892.067	1087.37	1327.42	1565.66	1800.41	2024.78	2233.45	2433.63	2634.81	2832.3	3011.95	3171.01	3325.73	3470.44	3603.28	3714.35
SSP2	SAU	Saudi Arabia	South Asia	Population	million	27.448	31.078	34.746	38.338	41.861	45.308	48.611	51.651	54.414	56.896	59.026	60.756	62.069	63.012	63.608	63.858	63.753	63.357	62.664		SSP2	SAU	Saudi Arabia	South Asia	GDP|PPP	billion US$2005/yr	563.632	731.943	901.722	1095.86	1321.32	1529.97	1746.9	1957.95	2157.09	2357.09	2567.49	2788.24	3013.63	3245.85	3492.95	3748.54	4010.4	4271.52
SSP3	SAU	Saudi Arabia	South Asia	Population	million	27.448	31.057	34.708	38.241	41.845	45.444	49.058	52.678	56.289	59.831	63.311	66.693	70.037	73.373	76.672	79.86	82.877	85.679	88.239		SSP3	SAU	Saudi Arabia	South Asia	GDP|PPP	billion US$2005/yr	563.632	731.455	900.64	1093.31	1329.94	1570.29	1813.8	2027.66	2190.21	2310.45	2408.98	2504.32	2604.36	2717.44	2847.96	2991.43	3147.39	3313.09
SSP4	SAU	Saudi Arabia	South Asia	Population	million	27.448	31.255	35.341	39.583	43.953	48.327	52.719	57.148	61.63	66.106	70.548	74.798	78.888	82.848	86.649	90.206	93.43	96.248	98.605		SSP4	SAU	Saudi Arabia	South Asia	GDP|PPP	billion US$2005/yr	563.632	736.114	918.466	1140.39	1433.98	1763.59	2119.83	2473.28	2804.4	3127	3462.64	3825.76	4226.22	4675.47	5180.1	5731.92	6327.56	6961.3
SSP5	SAU	Saudi Arabia	South Asia	Population	million	27.448	31.111	34.891	38.691	42.289	45.772	49.041	51.942	54.367	56.335	57.856	58.83	59.264	59.177	58.624	57.673	56.388	54.65	52.49		SSP5	SAU	Saudi Arabia	South Asia	GDP|PPP	billion US$2005/yr	563.632	732.721	908.468	1142.89	1475.35	1875.49	2321.64	2775.01	3206.02	3620.06	4035.93	4455.06	4861.84	5253.75	5653.02	6055.51	6456.18	6836.44
SSP1	SEN	Senegal	Mainland Africa	Population	million	12.434	13.824	15.038	16.123	17.074	17.936	18.649	19.17	19.506	19.71	19.814	19.863	19.837	19.731	19.547	19.296	18.986	18.624	18.219		SSP1	SEN	Senegal	Mainland Africa	GDP|PPP	billion US$2005/yr	21.61	25.957	33.917	46.666	65.615	93.15	130.848	180.07	241.957	317.313	405.712	505.726	614.187	727.984	847.086	969.927	1093.65	1215.45
SSP2	SEN	Senegal	Mainland Africa	Population	million	12.434	14.043	15.651	17.236	18.791	20.32	21.76	23.08	24.252	25.28	26.194	27.064	27.869	28.595	29.264	29.852	30.361	30.787	31.15		SSP2	SEN	Senegal	Mainland Africa	GDP|PPP	billion US$2005/yr	21.61	26.368	34.502	45.789	60.497	79.196	103.721	135.506	176.219	227.712	291.739	370.085	464.086	574.713	703.426	851.405	1019.21	1206.69
SSP3	SEN	Senegal	Mainland Africa	Population	million	12.434	14.257	16.356	18.658	21.141	23.693	26.327	29.026	31.779	34.536	37.269	40.042	42.853	45.696	48.585	51.498	54.429	57.37	60.338		SSP3	SEN	Senegal	Mainland Africa	GDP|PPP	billion US$2005/yr	21.61	26.77	35.615	46.109	57.881	70.399	85.155	102.493	122.71	146.369	173.965	206.155	243.252	285.411	332.78	385.436	443.882	508.461
SSP4	SEN	Senegal	Mainland Africa	Population	million	12.434	14.231	16.264	18.444	20.771	23.137	25.558	28.017	30.505	32.971	35.391	37.863	40.39	42.973	45.625	48.322	51.06	53.834	56.663		SSP4	SEN	Senegal	Mainland Africa	GDP|PPP	billion US$2005/yr	21.61	26.72	35.374	45.253	55.841	66.074	77.511	90.347	104.688	120.802	138.802	159.016	181.528	206.268	233.213	262.508	294.497	329.508
SSP5	SEN	Senegal	Mainland Africa	Population	million	12.434	13.795	14.936	15.894	16.696	17.388	17.912	18.23	18.356	18.347	18.237	18.099	17.917	17.689	17.416	17.11	16.779	16.429	16.066		SSP5	SEN	Senegal	Mainland Africa	GDP|PPP	billion US$2005/yr	21.61	25.902	33.764	47.296	69.433	103.868	152.107	216.178	297.812	398.463	518.122	656.235	809.587	975.527	1156.35	1351.62	1559.49	1777.97
SSP1	SLE	Sierra Leone	Mainland Africa	Population	million	5.868	6.518	7.164	7.789	8.367	8.918	9.415	9.837	10.187	10.469	10.689	10.84	10.917	10.918	10.848	10.713	10.522	10.281	9.999		SSP1	SLE	Sierra Leone	Mainland Africa	GDP|PPP	billion US$2005/yr	4.352	7.138	9.21	12.854	18.897	28.326	41.953	60.731	85.432	116.666	154.657	198.543	246.912	298.296	352.686	408.621	464.701	519.716
SSP2	SLE	Sierra Leone	Mainland Africa	Population	million	5.868	6.588	7.323	8.05	8.755	9.45	10.118	10.733	11.279	11.764	12.197	12.556	12.833	13.039	13.174	13.24	13.248	13.214	13.145		SSP2	SLE	Sierra Leone	Mainland Africa	GDP|PPP	billion US$2005/yr	4.352	7.215	9.313	12.477	16.928	22.855	30.844	41.441	55.275	73.085	95.652	123.423	156.742	195.874	241.353	293.193	351.408	415.848
SSP3	SLE	Sierra Leone	Mainland Africa	Population	million	5.868	6.608	7.37	8.143	8.947	9.733	10.491	11.225	11.932	12.601	13.222	13.786	14.296	14.744	15.153	15.513	15.828	16.113	16.354		SSP3	SLE	Sierra Leone	Mainland Africa	GDP|PPP	billion US$2005/yr	4.352	7.236	9.301	11.974	15.142	18.597	22.619	27.304	32.722	38.946	46.004	53.856	62.534	72.007	82.313	93.372	105.177	117.767
SSP4	SLE	Sierra Leone	Mainland Africa	Population	million	5.868	6.621	7.41	8.228	9.076	9.904	10.702	11.474	12.221	12.929	13.59	14.187	14.726	15.196	15.622	15.992	16.309	16.588	16.811		SSP4	SLE	Sierra Leone	Mainland Africa	GDP|PPP	billion US$2005/yr	4.352	7.25	9.333	11.951	14.922	17.861	21.072	24.603	28.467	32.681	37.224	42.024	47.082	52.362	57.888	63.604	69.526	75.714
SSP5	SLE	Sierra Leone	Mainland Africa	Population	million	5.868	6.53	7.201	7.865	8.482	9.072	9.608	10.07	10.459	10.776	11.027	11.202	11.296	11.309	11.244	11.11	10.913	10.664	10.369		SSP5	SLE	Sierra Leone	Mainland Africa	GDP|PPP	billion US$2005/yr	4.352	7.151	9.293	13.401	20.917	33.596	52.758	80.109	117.173	165.315	225.485	297.106	378.75	468.73	567.385	672.996	783.683	897.746
SSP1	SGP	Singapore	Southeast Asia	Population	million	5.086	5.518	5.706	5.876	6.027	6.163	6.273	6.346	6.378	6.37	6.326	6.233	6.093	5.897	5.656	5.378	5.055	4.701	4.333		SSP1	SGP	Singapore	Southeast Asia	GDP|PPP	billion US$2005/yr	264.851	321.858	383.146	437.545	483.045	517.975	546.53	566.644	577.117	583.244	586.039	583.886	578.118	567.147	553.062	534.846	513.352	489.49
SSP2	SGP	Singapore	Southeast Asia	Population	million	5.086	5.523	5.719	5.907	6.088	6.247	6.373	6.467	6.53	6.569	6.591	6.571	6.51	6.409	6.276	6.118	5.941	5.749	5.538		SSP2	SGP	Singapore	Southeast Asia	GDP|PPP	billion US$2005/yr	264.851	322.159	383.624	437.801	482.868	518.602	549.103	574.046	593.143	610.322	625.022	634.877	642.065	645.719	646.645	643.797	637.482	627.918
SSP3	SGP	Singapore	Southeast Asia	Population	million	5.086	5.468	5.636	5.775	5.9	5.984	6.02	6.02	6.006	5.991	5.981	5.956	5.912	5.855	5.793	5.733	5.676	5.616	5.547		SSP3	SGP	Singapore	Southeast Asia	GDP|PPP	billion US$2005/yr	264.851	318.929	376.162	419.856	448.454	464.173	474.666	480.377	482.097	484.167	485.531	485.233	486.099	487.42	488.271	486.235	481.48	474.255
SSP4	SGP	Singapore	Southeast Asia	Population	million	5.086	5.513	5.692	5.847	5.979	6.088	6.165	6.203	6.203	6.169	6.107	5.998	5.848	5.661	5.443	5.201	4.942	4.67	4.385		SSP4	SGP	Singapore	Southeast Asia	GDP|PPP	billion US$2005/yr	264.851	321.559	380.905	431.099	471.085	498.315	519.092	533.827	543.116	551.99	560.245	564.393	565.763	563.272	558.114	548.944	537.221	523.451
SSP5	SGP	Singapore	Southeast Asia	Population	million	5.086	5.578	5.81	6.045	6.268	6.484	6.685	6.853	6.973	7.043	7.065	7.02	6.912	6.733	6.494	6.206	5.856	5.464	5.046		SSP5	SGP	Singapore	Southeast Asia	GDP|PPP	billion US$2005/yr	264.851	325.386	390.953	455.392	516.057	570.744	622.6	669.228	708.234	744.833	780.643	811.835	837.121	853.743	864.415	868.257	866.283	859.517
SSP1	SOM	Somalia	Mainland Africa	Population	million	9.331	10.167	10.87	11.495	12.045	12.522	12.869	13.055	13.109	13.054	12.938	12.805	12.667	12.501	12.317	12.119	11.909	11.691	11.467		SSP1	SOM	Somalia	Mainland Africa	GDP|PPP	billion US$2005/yr	0.315	0.382	0.539	0.852	1.451	2.534	4.338	7.178	11.428	17.418	25.373	35.367	47.25	60.773	75.842	92.227	109.402	126.808
SSP2	SOM	Somalia	Mainland Africa	Population	million	9.331	10.289	11.235	12.201	13.184	14.124	14.934	15.598	16.162	16.65	17.052	17.422	17.765	18.076	18.358	18.619	18.842	19.047	19.229		SSP2	SOM	Somalia	Mainland Africa	GDP|PPP	billion US$2005/yr	0.315	0.361	0.487	0.697	1.006	1.431	2.056	2.97	4.296	6.171	8.74	12.199	16.751	22.63	30.08	39.31	50.446	63.597
SSP3	SOM	Somalia	Mainland Africa	Population	million	9.331	10.49	11.844	13.457	15.271	17.138	19.021	20.878	22.721	24.508	26.271	27.981	29.652	31.273	32.846	34.375	35.831	37.268	38.596		SSP3	SOM	Somalia	Mainland Africa	GDP|PPP	billion US$2005/yr	0.315	0.349	0.455	0.614	0.81	1.022	1.291	1.641	2.093	2.665	3.377	4.253	5.323	6.617	8.164	9.986	12.098	14.526
SSP4	SOM	Somalia	Mainland Africa	Population	million	9.331	10.428	11.64	13.004	14.509	16.023	17.518	18.957	20.347	21.649	22.899	24.125	25.358	26.591	27.827	29.063	30.275	31.508	32.692		SSP4	SOM	Somalia	Mainland Africa	GDP|PPP	billion US$2005/yr	0.315	0.346	0.442	0.576	0.721	0.838	0.966	1.109	1.271	1.448	1.638	1.844	2.067	2.309	2.57	2.851	3.152	3.479
SSP5	SOM	Somalia	Mainland Africa	Population	million	9.331	10.105	10.666	11.055	11.334	11.511	11.527	11.36	11.044	10.611	10.118	9.662	9.259	8.888	8.555	8.264	8.017	7.817	7.666		SSP5	SOM	Somalia	Mainland Africa	GDP|PPP	billion US$2005/yr	0.315	0.381	0.541	0.901	1.68	3.221	5.828	9.873	15.736	23.666	33.709	45.895	59.922	75.504	92.927	112.271	133.38	155.994
SSP1	ZAF	South Africa	Mainland Africa	Population	million	50.133	52.396	54.709	56.784	58.468	59.893	61.035	61.855	62.344	62.471	62.215	61.587	60.58	59.213	57.54	55.624	53.526	51.285	48.935		SSP1	ZAF	South Africa	Mainland Africa	GDP|PPP	billion US$2005/yr	474.761	570.256	710.767	883.319	1086.86	1320.97	1572.45	1827.7	2074.64	2311.96	2540.03	2745.84	2918.47	3061.09	3176.74	3264.27	3328.09	3369.76
SSP2	ZAF	South Africa	Mainland Africa	Population	million	50.133	52.493	54.797	56.845	58.585	60.028	61.254	62.25	63.045	63.631	64.042	64.183	64.028	63.591	62.884	62.019	61	59.823	58.484		SSP2	ZAF	South Africa	Mainland Africa	GDP|PPP	billion US$2005/yr	474.761	571.322	709.196	862.831	1024.29	1192.62	1369.72	1551.59	1736.31	1928.61	2132.36	2340.75	2549.39	2757.75	2962.24	3161.04	3353.76	3538.27
SSP3	ZAF	South Africa	Mainland Africa	Population	million	50.133	52.248	54.009	55.564	57.007	58.268	59.423	60.506	61.625	62.671	63.633	64.59	65.532	66.444	67.359	68.335	69.283	70.227	71.179		SSP3	ZAF	South Africa	Mainland Africa	GDP|PPP	billion US$2005/yr	474.761	568.648	696.646	822.564	933.803	1031.88	1123.22	1207.49	1287.89	1369.24	1455.33	1544.62	1637.51	1731.9	1825.89	1919.84	2013.4	2106.8
SSP4	ZAF	South Africa	Mainland Africa	Population	million	50.133	52.244	54.132	55.521	56.455	56.949	57.07	56.823	56.248	55.434	54.441	53.139	51.562	49.74	47.738	45.619	43.405	41.115	38.772		SSP4	ZAF	South Africa	Mainland Africa	GDP|PPP	billion US$2005/yr	474.761	568.604	699.956	839.311	984.82	1130.97	1276.61	1416.86	1549.01	1678.61	1808.65	1930.54	2039.65	2138.26	2225.91	2300.79	2363.91	2414.86
SSP5	ZAF	South Africa	Mainland Africa	Population	million	50.133	52.526	55.115	57.612	59.719	61.567	63.139	64.385	65.275	65.757	65.801	65.386	64.51	63.198	61.511	59.523	57.305	54.907	52.371		SSP5	ZAF	South Africa	Mainland Africa	GDP|PPP	billion US$2005/yr	474.761	571.674	716.45	908.189	1156.48	1464.3	1813.24	2189.18	2577.41	2975.67	3384.54	3784.63	4157.85	4503.35	4821.73	5110.48	5373.59	5610.9
SSP1	LKA	Sri Lanka	Southeast Asia	Population	million	20.86	21.597	22.087	22.354	22.467	22.498	22.413	22.173	21.782	21.284	20.71	20.101	19.46	18.786	18.087	17.377	16.6	15.767	14.886		SSP1	LKA	Sri Lanka	Southeast Asia	GDP|PPP	billion US$2005/yr	95.022	132.205	179.881	237.732	310.885	398.264	493.71	591.246	688.87	784.47	878.3	966.635	1040.62	1098.83	1149.26	1194.01	1232.19	1260.88
SSP2	LKA	Sri Lanka	Southeast Asia	Population	million	20.86	21.735	22.438	22.991	23.436	23.804	24.076	24.199	24.188	24.068	23.87	23.621	23.321	22.989	22.63	22.258	21.873	21.471	21.045		SSP2	LKA	Sri Lanka	Southeast Asia	GDP|PPP	billion US$2005/yr	95.022	133.047	180.569	235.366	294.842	357.098	423.233	491.701	563.922	641.692	725.822	814.335	901.864	987.389	1074.46	1163.46	1253.57	1343.04
SSP3	LKA	Sri Lanka	Southeast Asia	Population	million	20.86	21.773	22.634	23.462	24.257	25.001	25.697	26.32	26.89	27.419	27.935	28.464	29.015	29.596	30.224	30.906	31.639	32.422	33.258		SSP3	LKA	Sri Lanka	Southeast Asia	GDP|PPP	billion US$2005/yr	95.022	133.283	180.838	231.051	276.811	315.509	350.811	382.043	411.114	440.353	471.109	502.918	533.73	564.246	596.344	630.166	665.947	703.356
SSP4	LKA	Sri Lanka	Southeast Asia	Population	million	20.86	21.581	22.075	22.369	22.497	22.527	22.428	22.171	21.764	21.254	20.67	20.049	19.392	18.702	17.988	17.268	16.547	15.825	15.101		SSP4	LKA	Sri Lanka	Southeast Asia	GDP|PPP	billion US$2005/yr	95.022	132.104	177.587	229.043	283.211	336.799	388.906	436.662	481.149	524.361	566.941	606.565	638.648	663.243	685.306	705.629	724.6	741.525
SSP5	LKA	Sri Lanka	Southeast Asia	Population	million	20.86	21.552	21.95	22.08	22.053	21.937	21.705	21.325	20.801	20.176	19.48	18.77	18.048	17.318	16.583	15.856	15.085	14.279	13.445		SSP5	LKA	Sri Lanka	Southeast Asia	GDP|PPP	billion US$2005/yr	95.022	131.928	179.469	241.716	327.536	436.051	556.617	682.26	810.838	940.523	1072.27	1202.55	1320.08	1422.62	1520.31	1616.61	1710.89	1799.21
SSP1	SDN	Sudan	Mainland Africa	Population	million	43.552	48.481	53.171	57.441	61.619	65.74	69.84	73.654	77.031	80.01	82.544	84.636	86.231	87.248	87.656	87.466	86.792	85.769	84.439		SSP1	SDN	Sudan	Mainland Africa	GDP|PPP	billion US$2005/yr	88.125	97.496	140.428	192.052	270.197	385.06	542.598	750.812	1016.53	1346.45	1743.01	2199.59	2703.83	3252.04	3823.41	4413.95	5011.09	5597.6
SSP2	SDN	Sudan	Mainland Africa	Population	million	43.552	49.206	55.15	61.023	66.827	72.68	78.805	85.066	91.22	97.119	102.607	107.685	112.336	116.45	119.887	122.551	124.602	126.215	127.368		SSP2	SDN	Sudan	Mainland Africa	GDP|PPP	billion US$2005/yr	88.125	98.954	143.68	190.677	251.296	328.398	429.305	559.388	723.949	930.143	1186.84	1502.18	1882.01	2330.29	2846.78	3432.82	4088.67	4812.24
SSP3	SDN	Sudan	Mainland Africa	Population	million	43.552	49.884	56.995	64.626	72.359	80.525	89.475	99.314	109.699	120.316	131.034	141.931	153.029	164.162	175.009	185.342	195.441	205.661	215.801		SSP3	SDN	Sudan	Mainland Africa	GDP|PPP	billion US$2005/yr	88.125	100.316	146.679	190.2	239.335	293.722	358.799	435.379	523.304	623.845	740.613	876.514	1033.53	1212.71	1411.62	1632.11	1876.3	2146.52
SSP4	SDN	Sudan	Mainland Africa	Population	million	43.552	49.962	57.286	65.042	72.975	81.471	90.822	101.178	112.199	123.679	135.455	147.608	160.143	172.867	185.467	197.731	210.002	222.695	235.551		SSP4	SDN	Sudan	Mainland Africa	GDP|PPP	billion US$2005/yr	88.125	100.473	147.116	188.58	231.459	272.486	316.712	364.275	414.476	467.998	526.559	591.317	662.833	741.5	826.327	918.548	1019.44	1130.41
SSP5	SDN	Sudan	Mainland Africa	Population	million	43.552	48.528	53.316	57.524	61.634	65.681	69.709	73.448	76.747	79.71	82.23	84.311	85.899	86.909	87.314	87.122	86.45	85.433	84.111		SSP5	SDN	Sudan	Mainland Africa	GDP|PPP	billion US$2005/yr	88.125	97.59	141.372	198.338	293.127	442.913	655.886	945.613	1325	1808.68	2405.97	3114.64	3923.94	4835.18	5824.04	6890.07	8018.97	9186.41
SSP1	SUR	Suriname	Neotropics	Population	million	0.525	0.546	0.563	0.578	0.588	0.595	0.598	0.598	0.594	0.588	0.579	0.567	0.554	0.539	0.523	0.505	0.486	0.466	0.444		SSP1	SUR	Suriname	Neotropics	GDP|PPP	billion US$2005/yr	3.73	4.611	5.86	7.528	9.61	12.057	14.714	17.499	20.25	22.935	25.491	27.771	29.768	31.547	33.146	34.556	35.756	36.751
SSP2	SUR	Suriname	Neotropics	Population	million	0.525	0.549	0.572	0.593	0.613	0.629	0.642	0.652	0.659	0.665	0.667	0.668	0.666	0.663	0.658	0.652	0.645	0.636	0.626		SSP2	SUR	Suriname	Neotropics	GDP|PPP	billion US$2005/yr	3.73	4.637	5.91	7.417	9.079	10.872	12.845	15.011	17.311	19.762	22.345	24.988	27.726	30.603	33.563	36.566	39.569	42.552
SSP3	SUR	Suriname	Neotropics	Population	million	0.525	0.551	0.581	0.612	0.644	0.673	0.7	0.725	0.751	0.777	0.803	0.827	0.851	0.875	0.899	0.924	0.948	0.971	0.994		SSP3	SUR	Suriname	Neotropics	GDP|PPP	billion US$2005/yr	3.73	4.661	5.965	7.394	8.823	10.217	11.67	13.218	14.826	16.508	18.257	20.037	21.929	23.992	26.156	28.389	30.672	33.025
SSP4	SUR	Suriname	Neotropics	Population	million	0.525	0.547	0.567	0.584	0.597	0.605	0.61	0.611	0.608	0.602	0.593	0.582	0.568	0.552	0.535	0.516	0.497	0.476	0.455		SSP4	SUR	Suriname	Neotropics	GDP|PPP	billion US$2005/yr	3.73	4.621	5.856	7.278	8.864	10.55	12.334	14.2	16.068	17.941	19.797	21.534	23.162	24.721	26.195	27.551	28.788	29.919
SSP5	SUR	Suriname	Neotropics	Population	million	0.525	0.545	0.561	0.572	0.579	0.583	0.584	0.581	0.575	0.566	0.555	0.542	0.528	0.512	0.495	0.476	0.458	0.438	0.417		SSP5	SUR	Suriname	Neotropics	GDP|PPP	billion US$2005/yr	3.73	4.604	5.872	7.717	10.196	13.258	16.654	20.303	24.038	27.833	31.635	35.291	38.754	42.061	45.277	48.398	51.399	54.283
SSP1	TWN	Taiwan	Southeast Asia	Population	million	23.027	23.442	23.544	23.523	23.369	23.031	22.433	21.582	20.517	19.317	18.308	18.107	17.722	17.189	16.533	15.719	14.781	13.76	12.692		SSP1	TWN	Taiwan	Southeast Asia	GDP|PPP	billion US$2005/yr	742.813	889.439	1073.99	1208.73	1321.15	1424.86	1513.08	1570.7	1593.01	1587.29	1574.96	1608.62	1631.83	1638.59	1633.21	1610.47	1576.92	1534.29
SSP2	TWN	Taiwan	Southeast Asia	Population	million	23.019	23.47	23.614	23.656	23.569	23.269	22.712	21.937	21.006	19.985	19.193	19.334	19.35	19.25	19.043	18.729	18.27	17.694	17.026		SSP2	TWN	Taiwan	Southeast Asia	GDP|PPP	billion US$2005/yr	742.813	889.439	1073.21	1204.69	1312.7	1414.66	1507.6	1579.33	1624.95	1649.45	1672.66	1751.76	1830.27	1901.08	1961.67	2006.07	2037.25	2056.3
SSP3	TWN	Taiwan	Southeast Asia	Population	million	23.068	23.356	23.286	22.956	22.439	21.651	20.62	19.469	18.31	17.195	16.377	16.445	16.485	16.515	16.557	16.609	16.653	16.662	16.613		SSP3	TWN	Taiwan	Southeast Asia	GDP|PPP	billion US$2005/yr	742.813	889.439	1064.2	1157.02	1204.83	1234.15	1252.33	1253.05	1236.28	1208.74	1184.87	1209.91	1246.8	1287.41	1325.02	1355.2	1380.96	1403.66
SSP4	TWN	Taiwan	Southeast Asia	Population	million	23.037	23.416	23.476	23.401	23.18	22.756	22.064	21.136	20.036	18.853	17.9	17.814	17.601	17.265	16.815	16.257	15.56	14.758	13.879		SSP4	TWN	Taiwan	Southeast Asia	GDP|PPP	billion US$2005/yr	742.813	889.439	1080.28	1220.68	1334.27	1436.1	1524.1	1587.87	1623.77	1639.04	1653.98	1723.24	1788.63	1842.64	1885.42	1910.63	1921.59	1918.49
SSP5	TWN	Taiwan	Southeast Asia	Population	million	22.975	23.57	23.929	24.33	24.652	24.801	24.631	24.111	23.27	22.201	21.292	21.287	21.043	20.592	19.954	19.088	18.034	16.84	15.554		SSP5	TWN	Taiwan	Southeast Asia	GDP|PPP	billion US$2005/yr	742.813	889.439	1084.6	1261.96	1440.95	1627.21	1806.41	1960.61	2078.27	2162.76	2241.04	2384.59	2510.56	2613.28	2703.52	2767.28	2813.18	2841.16
SSP1	TZA	Tanzania	Mainland Africa	Population	million	44.841	50.609	56.306	61.977	67.357	72.578	77.362	81.523	85.019	87.938	90.308	92.206	93.607	94.515	94.955	94.946	94.484	93.555	92.162		SSP1	TZA	Tanzania	Mainland Africa	GDP|PPP	billion US$2005/yr	56.273	75.539	103.978	152.223	227.49	340.002	496.912	706.194	975.595	1309.4	1707.48	2165.19	2672.78	3213.97	3786.97	4380.84	4981.46	5577.61
SSP2	TZA	Tanzania	Mainland Africa	Population	million	44.841	51.352	58.362	65.593	73.026	80.562	88.103	95.348	102.254	108.601	114.341	119.703	124.681	129.115	133.084	136.633	139.636	142.024	143.787		SSP2	TZA	Tanzania	Mainland Africa	GDP|PPP	billion US$2005/yr	56.273	76.648	106.837	152.234	213.831	293.669	397.54	531.5	702.113	916.467	1180.81	1502.4	1886.39	2334.96	2853.89	3446.97	4116.63	4863.7
SSP3	TZA	Tanzania	Mainland Africa	Population	million	44.841	51.84	59.857	68.69	78.347	88.404	98.92	109.736	120.723	131.466	142.023	152.293	162.51	172.445	182.215	191.847	201.091	210.057	218.654		SSP3	TZA	Tanzania	Mainland Africa	GDP|PPP	billion US$2005/yr	56.273	77.377	108.36	149.256	198.298	254.168	320.639	399.987	494.779	606.078	735.495	884.135	1053.29	1241.36	1448.19	1673.93	1917.71	2180.17
SSP4	TZA	Tanzania	Mainland Africa	Population	million	44.841	51.802	59.74	68.426	77.896	87.705	97.931	108.422	119.048	129.384	139.487	149.322	159.139	168.722	178.185	187.545	196.553	205.316	213.74		SSP4	TZA	Tanzania	Mainland Africa	GDP|PPP	billion US$2005/yr	56.273	77.319	107.876	146.251	190.579	237.019	289.508	349.439	418.349	496.254	583.728	681.061	788.699	905.054	1029.77	1163.05	1304.58	1455.41
SSP5	TZA	Tanzania	Mainland Africa	Population	million	44.841	50.545	56.086	61.489	66.557	71.419	75.791	79.492	82.494	84.894	86.731	88.147	89.13	89.694	89.869	89.676	89.114	88.168	86.841		SSP5	TZA	Tanzania	Mainland Africa	GDP|PPP	billion US$2005/yr	56.273	75.443	104.107	156.823	247.41	392.945	602.001	886.775	1259.91	1730.42	2302.15	2975	3741.61	4585.38	5511.97	6512.12	7571.78	8679.64
SSP1	THA	Thailand	Southeast Asia	Population	million	69.122	70.967	72.337	73.232	73.6	73.528	72.937	71.812	70.212	68.277	66.097	63.653	60.998	58.16	55.185	52.109	48.977	45.838	42.741		SSP1	THA	Thailand	Southeast Asia	GDP|PPP	billion US$2005/yr	530.367	649.827	834.959	1084.74	1399.69	1765.02	2151.68	2536.37	2899.33	3237.29	3544.51	3810.23	4026.03	4193.1	4318.59	4400.06	4440.54	4445.8
SSP2	THA	Thailand	Southeast Asia	Population	million	69.122	71.114	72.846	74.141	75.018	75.384	75.219	74.568	73.552	72.29	70.863	69.193	67.348	65.35	63.271	61.134	58.972	56.811	54.662		SSP2	THA	Thailand	Southeast Asia	GDP|PPP	billion US$2005/yr	530.367	651.168	834.091	1054.52	1298.9	1555.62	1825.87	2105.24	2389.52	2678.18	2967.92	3250.61	3523.13	3786.07	4035.91	4264.46	4473.98	4663.63
SSP3	THA	Thailand	Southeast Asia	Population	million	69.122	71.21	73.046	74.553	75.698	76.319	76.468	76.297	75.951	75.624	75.362	75.063	74.872	74.856	75.023	75.408	75.953	76.575	77.291		SSP3	THA	Thailand	Southeast Asia	GDP|PPP	billion US$2005/yr	530.367	652.046	829.287	1012.98	1184.01	1326.85	1455.36	1571.32	1678.96	1783.86	1889	1995.14	2105.41	2223.37	2344.89	2466.47	2589.32	2715.55
SSP4	THA	Thailand	Southeast Asia	Population	million	69.122	70.944	72.27	73.062	73.264	72.93	72.011	70.516	68.553	66.266	63.758	60.983	58.027	54.925	51.768	48.599	45.474	42.43	39.495		SSP4	THA	Thailand	Southeast Asia	GDP|PPP	billion US$2005/yr	530.367	649.618	826.484	1030.15	1252.85	1476.21	1695.81	1905.04	2102.98	2291.71	2468.76	2623.52	2752.3	2857.34	2942.7	3005.97	3049.18	3075.49
SSP5	THA	Thailand	Southeast Asia	Population	million	69.122	71.061	72.633	73.843	74.539	74.807	74.565	73.781	72.501	70.852	68.919	66.644	64.089	61.286	58.288	55.137	51.891	48.607	45.341		SSP5	THA	Thailand	Southeast Asia	GDP|PPP	billion US$2005/yr	530.367	650.687	843.089	1131.5	1526.56	2012.45	2544.38	3100.89	3660.05	4219.45	4772.59	5299.91	5782.98	6217.42	6609.33	6951.65	7243.77	7490.32
SSP1	TLS	Timor-Leste	Southeast Asia	Population	million	1.124	1.235	1.342	1.441	1.524	1.593	1.644	1.676	1.69	1.689	1.675	1.66	1.647	1.633	1.619	1.605	1.592	1.58	1.57		SSP1	TLS	Timor-Leste	Southeast Asia	GDP|PPP	billion US$2005/yr	1.481	2.276	3.365	4.997	7.503	11.245	16.487	23.453	32.14	42.511	54.2	67.244	81.565	96.792	112.848	129.536	146.719	164.441
SSP2	TLS	Timor-Leste	Southeast Asia	Population	million	1.124	1.245	1.377	1.515	1.651	1.775	1.883	1.976	2.059	2.129	2.182	2.231	2.28	2.331	2.383	2.437	2.492	2.549	2.608		SSP2	TLS	Timor-Leste	Southeast Asia	GDP|PPP	billion US$2005/yr	1.481	2.294	3.41	4.862	6.7	8.974	11.941	15.75	20.428	26.022	32.46	40.044	49.038	59.549	71.664	85.422	100.942	118.48
SSP3	TLS	Timor-Leste	Southeast Asia	Population	million	1.124	1.27	1.46	1.695	1.956	2.225	2.499	2.782	3.086	3.397	3.708	4.018	4.326	4.638	4.963	5.298	5.632	5.965	6.3		SSP3	TLS	Timor-Leste	Southeast Asia	GDP|PPP	billion US$2005/yr	1.481	2.341	3.574	5.092	6.829	8.709	10.967	13.664	16.756	20.233	24.04	28.292	33.089	38.411	44.225	50.465	57.076	64.111
SSP4	TLS	Timor-Leste	Southeast Asia	Population	million	1.124	1.259	1.418	1.596	1.785	1.97	2.152	2.335	2.521	2.697	2.861	3.028	3.2	3.384	3.583	3.793	4.009	4.233	4.469		SSP4	TLS	Timor-Leste	Southeast Asia	GDP|PPP	billion US$2005/yr	1.481	2.319	3.456	4.68	5.913	6.978	8.078	9.209	10.279	11.244	12.057	12.806	13.504	14.109	14.58	14.9	15.067	15.101
SSP5	TLS	Timor-Leste	Southeast Asia	Population	million	1.124	1.224	1.304	1.356	1.385	1.394	1.374	1.332	1.266	1.182	1.086	0.994	0.91	0.834	0.767	0.714	0.678	0.657	0.653		SSP5	TLS	Timor-Leste	Southeast Asia	GDP|PPP	billion US$2005/yr	1.481	2.256	3.294	4.946	7.692	11.919	17.546	24.589	32.649	41.333	49.864	58.129	65.971	73.242	80.769	89.002	98.538	110.17
SSP1	TGO	Togo	Mainland Africa	Population	million	6.028	6.594	7.168	7.708	8.185	8.617	8.993	9.307	9.559	9.749	9.876	9.945	9.956	9.91	9.81	9.663	9.472	9.243	8.98		SSP1	TGO	Togo	Mainland Africa	GDP|PPP	billion US$2005/yr	5.414	6.842	9.058	12.561	18.017	26.371	38.662	56.07	79.746	110.599	149.179	195.465	248.887	308.344	373.023	441.043	511.01	581.68
SSP2	TGO	Togo	Mainland Africa	Population	million	6.028	6.652	7.277	7.888	8.47	9.023	9.523	9.961	10.349	10.683	10.957	11.173	11.337	11.447	11.506	11.53	11.523	11.484	11.416		SSP2	TGO	Togo	Mainland Africa	GDP|PPP	billion US$2005/yr	5.414	6.902	9.097	11.996	15.622	20.089	26.029	33.93	44.356	57.974	75.506	97.745	125.559	159.719	200.91	249.688	306.37	371.156
SSP3	TGO	Togo	Mainland Africa	Population	million	6.028	6.662	7.332	8.018	8.711	9.364	9.977	10.551	11.103	11.607	12.056	12.457	12.801	13.106	13.384	13.638	13.873	14.099	14.294		SSP3	TGO	Togo	Mainland Africa	GDP|PPP	billion US$2005/yr	5.414	6.913	9.103	11.661	14.372	17.106	20.306	24.07	28.424	33.396	39.01	45.335	52.4	60.219	68.747	77.916	87.726	98.259
SSP4	TGO	Togo	Mainland Africa	Population	million	6.028	6.661	7.328	8.01	8.697	9.343	9.948	10.515	11.059	11.556	11.997	12.39	12.73	13.031	13.307	13.56	13.794	14.021	14.217		SSP4	TGO	Togo	Mainland Africa	GDP|PPP	billion US$2005/yr	5.414	6.912	9.087	11.567	14.051	16.263	18.68	21.355	24.266	27.395	30.727	34.282	38.06	42.051	46.218	50.528	55.004	59.729
SSP5	TGO	Togo	Mainland Africa	Population	million	6.028	6.593	7.164	7.698	8.168	8.593	8.962	9.268	9.511	9.692	9.811	9.873	9.878	9.828	9.726	9.577	9.386	9.158	8.898		SSP5	TGO	Togo	Mainland Africa	GDP|PPP	billion US$2005/yr	5.414	6.841	9.095	13.019	19.823	31.083	48.205	73.112	107.772	153.933	212.957	285.526	371.579	470.303	581.344	702.611	832.637	970.043
SSP1	TTO	Trinidad	Neotropics	Population	million	1.341	1.356	1.358	1.347	1.328	1.302	1.269	1.229	1.181	1.128	1.072	1.015	0.956	0.896	0.837	0.778	0.722	0.668	0.615		SSP1	TTO	Trinidad	Neotropics	GDP|PPP	billion US$2005/yr	31.079	33.224	38.189	43.488	49.05	54.535	59.16	62.316	63.845	64.743	65.451	65.702	65.088	63.685	62.076	60.467	58.941	57.387
SSP2	TTO	Trinidad	Neotropics	Population	million	1.341	1.361	1.372	1.371	1.36	1.343	1.319	1.287	1.247	1.201	1.151	1.1	1.049	0.998	0.948	0.901	0.859	0.82	0.785		SSP2	TTO	Trinidad	Neotropics	GDP|PPP	billion US$2005/yr	31.079	33.343	38.364	43.065	47.267	51.128	54.489	56.976	58.556	60.003	61.649	63.233	64.405	65.133	65.704	66.292	67.052	67.925
SSP3	TTO	Trinidad	Neotropics	Population	million	1.341	1.368	1.392	1.409	1.417	1.418	1.412	1.4	1.382	1.359	1.333	1.306	1.281	1.259	1.241	1.228	1.221	1.218	1.219		SSP3	TTO	Trinidad	Neotropics	GDP|PPP	billion US$2005/yr	31.079	33.52	38.735	43.08	46.404	48.988	50.982	52.146	52.578	53.015	53.783	54.685	55.494	56.166	56.828	57.625	58.674	59.947
SSP4	TTO	Trinidad	Neotropics	Population	million	1.341	1.357	1.36	1.35	1.329	1.3	1.263	1.217	1.163	1.104	1.041	0.976	0.911	0.847	0.783	0.724	0.669	0.618	0.571		SSP4	TTO	Trinidad	Neotropics	GDP|PPP	billion US$2005/yr	31.079	33.246	38.156	43.015	47.819	52.24	55.672	57.754	58.574	59.082	59.63	59.881	59.483	58.469	57.26	56.059	55.007	54.049
SSP5	TTO	Trinidad	Neotropics	Population	million	1.341	1.352	1.347	1.328	1.3	1.266	1.226	1.179	1.126	1.069	1.009	0.949	0.889	0.829	0.77	0.712	0.658	0.607	0.557		SSP5	TTO	Trinidad	Neotropics	GDP|PPP	billion US$2005/yr	31.079	33.138	38.043	43.904	50.672	57.743	63.96	68.711	71.801	74.331	76.786	78.844	79.96	80.151	80.083	80.033	80.143	80.282
SSP1	TUN	Tunisia	Mainland Africa	Population	million	10.481	10.965	11.374	11.685	11.886	12.012	12.08	12.087	12.02	11.879	11.665	11.382	11.045	10.666	10.255	9.823	9.383	8.919	8.431		SSP1	TUN	Tunisia	Mainland Africa	GDP|PPP	billion US$2005/yr	89.757	101.916	134.561	177.857	232.008	294.346	358.928	420.353	472.575	516.981	556.57	593.274	623.199	644.423	659.591	669.388	676.049	680.484
SSP2	TUN	Tunisia	Mainland Africa	Population	million	10.481	10.998	11.475	11.887	12.206	12.433	12.596	12.7	12.743	12.718	12.616	12.439	12.204	11.938	11.663	11.394	11.138	10.892	10.645		SSP2	TUN	Tunisia	Mainland Africa	GDP|PPP	billion US$2005/yr	89.757	102.225	134.909	175.156	221.628	272.404	325.998	379.467	428.537	474.317	518.609	562.683	603.495	639.569	672.434	702.364	730.76	759.238
SSP3	TUN	Tunisia	Mainland Africa	Population	million	10.481	11.042	11.595	12.113	12.556	12.905	13.2	13.466	13.707	13.9	14.031	14.102	14.146	14.214	14.338	14.525	14.75	14.986	15.225		SSP3	TUN	Tunisia	Mainland Africa	GDP|PPP	billion US$2005/yr	89.757	102.629	135.489	173.252	213.338	253.28	293.374	331.508	364.705	394.781	423.633	452.847	481.012	507.856	534.16	560.109	586.496	614.27
SSP4	TUN	Tunisia	Mainland Africa	Population	million	10.481	10.962	11.367	11.675	11.863	11.963	11.989	11.943	11.817	11.607	11.31	10.935	10.501	10.033	9.553	9.08	8.622	8.18	7.748		SSP4	TUN	Tunisia	Mainland Africa	GDP|PPP	billion US$2005/yr	89.757	101.886	133.608	172.302	217.621	266.518	316.512	364.01	404.704	440.279	472.968	503.524	528.558	546.609	560.103	569.803	577.652	585.072
SSP5	TUN	Tunisia	Mainland Africa	Population	million	10.481	10.961	11.362	11.661	11.853	11.97	12.029	12.029	11.956	11.81	11.592	11.308	10.969	10.59	10.179	9.748	9.31	8.848	8.364		SSP5	TUN	Tunisia	Mainland Africa	GDP|PPP	billion US$2005/yr	89.757	101.879	135.25	183.283	247.388	324.915	407.438	489.333	563.753	632.336	698.69	765.072	826.208	879.025	926.374	968.632	1008.51	1047.04
SSP1	UGA	Uganda	Mainland Africa	Population	million	33.425	38.474	43.748	49.244	54.832	60.596	66.235	71.526	76.371	80.819	84.828	88.382	91.402	93.868	95.798	97.216	98.115	98.484	98.334		SSP1	UGA	Uganda	Mainland Africa	GDP|PPP	billion US$2005/yr	38.411	50.628	71.123	105.125	159.596	243.692	366.797	540.315	776.072	1085.09	1474.4	1946.43	2497.92	3120.78	3810.82	4556.67	5340.59	6144.91
SSP2	UGA	Uganda	Mainland Africa	Population	million	33.425	39.119	45.461	52.404	59.961	68.014	76.345	84.804	93.253	101.455	109.339	116.919	124.039	130.731	136.962	142.603	147.606	151.913	155.661		SSP2	UGA	Uganda	Mainland Africa	GDP|PPP	billion US$2005/yr	38.411	51.477	73.156	104.798	148.771	208.062	290.163	402.799	555.22	758.037	1022.49	1361.1	1786.29	2308.68	2938.44	3684.01	4551.07	5541.95
SSP3	UGA	Uganda	Mainland Africa	Population	million	33.425	39.64	47.006	55.448	65.143	75.769	87.397	99.938	113.302	126.879	140.529	154.212	167.912	181.496	195.065	208.172	220.756	233.12	244.807		SSP3	UGA	Uganda	Mainland Africa	GDP|PPP	billion US$2005/yr	38.411	52.162	74.534	103.283	138.329	179.613	231.654	297.424	379.797	481.498	605.367	754.719	931.984	1137.77	1372.89	1636.87	1929.57	2252.65
SSP4	UGA	Uganda	Mainland Africa	Population	million	33.425	39.623	46.956	55.331	64.932	75.419	86.874	99.213	112.337	125.62	138.916	152.232	165.568	178.797	192.008	204.759	216.987	228.991	240.322		SSP4	UGA	Uganda	Mainland Africa	GDP|PPP	billion US$2005/yr	38.411	52.14	74.219	101.142	132.845	167.359	209.001	259.662	320.9	393.923	479.963	580.598	696.656	827.646	973.432	1133.35	1307.31	1496.8
SSP5	UGA	Uganda	Mainland Africa	Population	million	33.425	38.443	43.639	48.995	54.412	59.972	65.367	70.371	74.893	78.987	82.616	85.809	88.497	90.674	92.368	93.608	94.393	94.712	94.578		SSP5	UGA	Uganda	Mainland Africa	GDP|PPP	billion US$2005/yr	38.411	50.588	71.258	108.191	173.289	281.427	445.117	681.654	1009.9	1448.81	2013.25	2713.99	3554.61	4532.73	5653.41	6910.3	8287.16	9766.17
SSP1	VEN	Venezuela	Neotropics	Population	million	28.98	30.966	32.684	34.161	35.378	36.379	37.123	37.604	37.829	37.834	37.634	37.233	36.642	35.872	34.938	33.832	32.48	30.93	29.237		SSP1	VEN	Venezuela	Neotropics	GDP|PPP	billion US$2005/yr	316.397	379.724	437.411	519.759	613.86	714.315	823.732	941.514	1064.39	1193.11	1326.87	1460.55	1587.43	1702.74	1810.02	1905.35	1983.62	2043.4
SSP2	VEN	Venezuela	Neotropics	Population	million	28.98	31.164	33.203	35.109	36.864	38.405	39.729	40.835	41.714	42.378	42.833	43.069	43.081	42.88	42.52	42.014	41.381	40.641	39.817		SSP2	VEN	Venezuela	Neotropics	GDP|PPP	billion US$2005/yr	316.397	382.149	442.727	521.198	607.469	703.033	805.839	918.675	1041.3	1173.55	1314.43	1458.73	1604.14	1751.14	1902.15	2056.49	2211.76	2365.82
SSP3	VEN	Venezuela	Neotropics	Population	million	28.98	31.367	33.85	36.301	38.7	40.947	43.081	45.131	47.097	48.931	50.629	52.191	53.639	54.995	56.296	57.568	58.825	60.071	61.304		SSP3	VEN	Venezuela	Neotropics	GDP|PPP	billion US$2005/yr	316.397	384.641	449.114	525.532	620.159	735.455	874.948	1035.92	1207.2	1377.92	1540.78	1688.63	1820.78	1942.03	2056.5	2166.05	2273.99	2381.59
SSP4	VEN	Venezuela	Neotropics	Population	million	28.98	31.097	33.063	34.769	36.154	37.276	38.113	38.659	38.912	38.904	38.65	38.148	37.412	36.468	35.347	34.084	32.714	31.266	29.765		SSP4	VEN	Venezuela	Neotropics	GDP|PPP	billion US$2005/yr	316.397	381.331	440.08	515.238	595.174	685.876	774.003	859.031	941.623	1023.54	1105.27	1180.43	1246.64	1305.52	1361.19	1413.04	1461.82	1507.4
SSP5	VEN	Venezuela	Neotropics	Population	million	28.98	30.973	32.705	34.203	35.441	36.463	37.229	37.731	37.976	38.001	37.817	37.43	36.849	36.084	35.153	34.046	32.69	31.134	29.432		SSP5	VEN	Venezuela	Neotropics	GDP|PPP	billion US$2005/yr	316.397	379.81	438.357	530.441	660.302	833.821	1035.94	1264.87	1513.8	1781.05	2062.91	2348.11	2625.44	2890.19	3150.16	3400.67	3633.25	3844.12
SSP1	VNM	Vietnam	Southeast Asia	Population	million	87.848	92.035	95.483	97.876	99.299	100.092	100.235	99.623	98.224	96.15	93.552	90.581	87.295	83.712	79.855	75.684	71.091	66.325	61.35		SSP1	VNM	Vietnam	Southeast Asia	GDP|PPP	billion US$2005/yr	249.923	333.128	470.241	642.261	861.649	1128.57	1433.13	1762.01	2091.51	2410.1	2715.25	3019.67	3294.28	3520.84	3706.51	3854.14	3969.19	4053.91
SSP2	VNM	Vietnam	Southeast Asia	Population	million	87.848	92.375	96.408	99.606	101.958	103.623	104.65	104.956	104.376	103.131	101.329	99.103	96.537	93.663	90.54	87.306	84.128	81.111	78.267		SSP2	VNM	Vietnam	Southeast Asia	GDP|PPP	billion US$2005/yr	249.923	334.359	471.171	621.722	787.227	963.961	1162.05	1378.56	1602.44	1831.78	2070.28	2330.18	2593.47	2847.72	3092.64	3330.81	3568.95	3809.19
SSP3	VNM	Vietnam	Southeast Asia	Population	million	87.848	92.721	97.488	101.67	105.134	107.872	110.042	111.629	112.599	112.921	112.732	112.22	111.548	110.82	110.119	109.576	109.322	109.397	109.731		SSP3	VNM	Vietnam	Southeast Asia	GDP|PPP	billion US$2005/yr	249.923	335.61	472.887	610.703	745.518	870.905	999.625	1130.65	1255.85	1375.66	1495.58	1626.69	1758.33	1884.49	2004.73	2122.71	2245.71	2376.77
SSP4	VNM	Vietnam	Southeast Asia	Population	million	87.848	92.01	95.447	97.826	99.169	99.796	99.689	98.745	96.94	94.402	91.283	87.721	83.798	79.565	75.102	70.555	66.099	61.846	57.821		SSP4	VNM	Vietnam	Southeast Asia	GDP|PPP	billion US$2005/yr	249.923	333.036	466.722	611.356	774.129	947.447	1135.56	1332.18	1524.03	1707.69	1885.71	2067.71	2233.94	2372.61	2487.79	2582.88	2666.96	2743.57
SSP5	VNM	Vietnam	Southeast Asia	Population	million	87.848	91.953	95.225	97.363	98.547	99.109	99.031	98.213	96.63	94.396	91.662	88.584	85.224	81.599	77.737	73.593	69.06	64.38	59.518		SSP5	VNM	Vietnam	Southeast Asia	GDP|PPP	billion US$2005/yr	249.923	332.832	473.046	667.332	938.48	1287.64	1692.98	2141.24	2606.04	3074.82	3545.55	4036	4508.27	4935.99	5326.34	5680.06	6002.71	6295.82
SSP1	YEM	Yemen	South Asia	Population	million	24.053	27.602	31.057	34.252	37.183	40.016	42.694	45.093	47.099	48.727	49.988	50.946	51.606	51.953	51.99	51.738	51.227	50.482	49.524		SSP1	YEM	Yemen	South Asia	GDP|PPP	billion US$2005/yr	57.076	56.078	70.414	92.734	126.893	175.594	239.079	315.732	404.344	504.731	616.41	737.964	864.231	990.238	1113.72	1233.53	1349.15	1458.72
SSP2	YEM	Yemen	South Asia	Population	million	24.053	27.896	31.976	36.111	40.189	44.324	48.512	52.648	56.604	60.19	63.356	66.223	68.828	71.115	73.038	74.613	75.813	76.685	77.281		SSP2	YEM	Yemen	South Asia	GDP|PPP	billion US$2005/yr	57.076	56.677	71.669	94.422	126.514	169.189	223.994	291.226	371.68	467.186	579.321	709.168	855.255	1015.17	1186.47	1368.11	1559.71	1760.16
SSP3	YEM	Yemen	South Asia	Population	million	24.053	28.057	32.796	38.112	43.795	49.678	55.925	62.56	69.474	76.434	83.317	90.061	96.812	103.534	110.199	116.788	123.168	129.292	135.274		SSP3	YEM	Yemen	South Asia	GDP|PPP	billion US$2005/yr	57.076	57.003	72.648	94.993	123.098	156.377	196.657	243.628	297.366	359.772	432.478	517.122	613.572	721.391	839.253	965.414	1099.77	1242.52
SSP4	YEM	Yemen	South Asia	Population	million	24.053	28.063	32.802	38.081	43.705	49.484	55.595	62.065	68.78	75.5	82.096	88.546	95.004	101.44	107.821	114.12	120.204	126.027	131.7		SSP4	YEM	Yemen	South Asia	GDP|PPP	billion US$2005/yr	57.076	57.016	72.489	93.321	119.403	149.125	184.759	226.198	273.593	328.319	391.107	462.616	542.654	630.423	724.37	823.682	928.193	1038.4
SSP5	YEM	Yemen	South Asia	Population	million	24.053	27.57	30.943	33.995	36.758	39.401	41.858	44.006	45.74	47.086	48.06	48.76	49.194	49.356	49.253	48.912	48.359	47.622	46.723		SSP5	YEM	Yemen	South Asia	GDP|PPP	billion US$2005/yr	57.076	56.013	70.128	93.399	131.294	188.384	265.037	360.793	475.273	609.698	765.016	941.146	1132.35	1333.69	1544.09	1762.71	1990.04	2224.43
SSP1	ZMB	Zambia	Mainland Africa	Population	million	13.089	14.72	16.395	18.073	19.711	21.355	22.904	24.276	25.457	26.487	27.384	28.164	28.801	29.289	29.635	29.846	29.921	29.858	29.655		SSP1	ZMB	Zambia	Mainland Africa	GDP|PPP	billion US$2005/yr	18.112	24.814	34.634	50.615	76.128	114.567	168.62	241.093	334.839	452.4	594.683	760.795	947.918	1151.08	1367.23	1592.23	1820.24	2045.68
SSP2	ZMB	Zambia	Mainland Africa	Population	million	13.089	14.963	16.968	19.114	21.368	23.658	25.906	28.051	30.104	32.05	33.86	35.521	37.072	38.481	39.766	40.938	41.931	42.769	43.433		SSP2	ZMB	Zambia	Mainland Africa	GDP|PPP	billion US$2005/yr	18.112	25.223	35.45	49.94	69.835	95.813	130.562	176.522	236.271	312.769	408.877	527.404	671.3	842.312	1041.5	1269.42	1525.16	1807.32
SSP3	ZMB	Zambia	Mainland Africa	Population	million	13.089	15.228	17.81	20.602	23.694	27.023	30.559	34.175	37.94	41.631	45.253	48.905	52.551	56.154	59.772	63.248	66.675	70.03	73.254		SSP3	ZMB	Zambia	Mainland Africa	GDP|PPP	billion US$2005/yr	18.112	25.671	36.695	50.518	67.24	86.543	110.301	139.179	174.253	216.642	267.183	327.089	396.902	476.374	565.801	664.571	773.331	892.201
SSP4	ZMB	Zambia	Mainland Africa	Population	million	13.089	15.217	17.776	20.522	23.548	26.784	30.201	33.678	37.278	40.777	44.179	47.601	51.012	54.377	57.747	60.969	64.13	67.209	70.147		SSP4	ZMB	Zambia	Mainland Africa	GDP|PPP	billion US$2005/yr	18.112	25.652	36.489	49.259	64.174	80.042	98.79	120.814	146.806	177.345	212.686	253.385	299.559	350.71	406.822	467.536	533.318	604.43
SSP5	ZMB	Zambia	Mainland Africa	Population	million	13.089	14.702	16.334	17.939	19.491	21.035	22.466	23.705	24.74	25.616	26.35	26.979	27.484	27.86	28.117	28.264	28.298	28.218	28.022		SSP5	ZMB	Zambia	Mainland Africa	GDP|PPP	billion US$2005/yr	18.112	24.784	34.713	52.31	83.02	132.375	203.499	300.715	428.694	592.215	794.366	1036.57	1317.48	1633.19	1982.98	2363.86	2770.07	3195.54
SSP1	ZWE	Zimbabwe	Mainland Africa	Population	million	12.571	12.692	12.904	13.004	12.963	12.856	12.698	12.49	12.242	11.963	11.65	11.346	11.042	10.729	10.405	10.076	9.745	9.418	9.094		SSP1	ZWE	Zimbabwe	Mainland Africa	GDP|PPP	billion US$2005/yr	5.221	6.323	7.287	9.488	13.452	20.017	29.872	43.714	62.078	85.277	113.202	145.952	183.065	223.51	266.897	312.203	358.852	406.363
SSP2	ZWE	Zimbabwe	Mainland Africa	Population	million	12.571	12.77	13.075	13.257	13.327	13.339	13.31	13.238	13.124	12.962	12.769	12.59	12.422	12.242	12.064	11.897	11.743	11.603	11.481		SSP2	ZWE	Zimbabwe	Mainland Africa	GDP|PPP	billion US$2005/yr	5.221	6.361	7.318	9.151	12.007	16.183	22.199	30.475	41.405	55.391	72.766	94.188	120.041	150.473	185.747	226.16	271.936	323.239
SSP3	ZWE	Zimbabwe	Mainland Africa	Population	million	12.571	12.91	13.52	14.191	14.791	15.29	15.743	16.198	16.666	17.101	17.455	17.8	18.138	18.492	18.842	19.212	19.577	19.953	20.337		SSP3	ZWE	Zimbabwe	Mainland Africa	GDP|PPP	billion US$2005/yr	5.221	6.431	7.468	9.131	11.391	14.285	18.212	23.352	29.848	37.879	47.593	59.374	73.51	90.146	109.317	131.079	155.561	182.953
SSP4	ZWE	Zimbabwe	Mainland Africa	Population	million	12.571	12.768	13.118	13.394	13.598	13.721	13.824	13.937	14.062	14.158	14.196	14.277	14.397	14.563	14.75	14.975	15.215	15.483	15.774		SSP4	ZWE	Zimbabwe	Mainland Africa	GDP|PPP	billion US$2005/yr	5.221	6.36	7.23	8.506	10.204	12.202	14.842	18.198	22.315	27.264	33.089	40.076	48.405	58.161	69.364	82.134	96.61	112.98
SSP5	ZWE	Zimbabwe	Mainland Africa	Population	million	12.571	12.556	12.518	12.238	11.818	11.339	10.803	10.218	9.606	8.989	8.373	7.834	7.357	6.931	6.556	6.228	5.944	5.701	5.494		SSP5	ZWE	Zimbabwe	Mainland Africa	GDP|PPP	billion US$2005/yr	5.221	6.255	7.132	9.417	13.813	21.236	32.084	46.808	65.637	88.577	115.14	145.688	179.79	216.942	258.554	303.802	353.069	407.015
[truncated: 26 more columns]

## Sheet: GDPPC
	gdgppc	SSP1	2010	2015	2020	2025	2030	2035	2040	2045	2050	2055	2060	2065	2070	2075	2080	2085	2090	2095	2100			SSP1	2010	2015	2020	2025	2030	2035	2040	2045	2050	2055	2060	2065	2070	2075	2080	2085	2090	2095	2100
	Madagascar		868.929	859.536	983.527	1262.13	1741.87	2489.99	3570.81	5073.91	7090.38	9671.74	12848.6	16616.7	20968.5	25850.2	31308	37298.4	43791	50774.1	58186.8			Madagascar	868.929	859.536	983.527	1262.13	1741.87	2489.99	3570.81	5073.91	7090.38	9671.74	12848.6	16616.7	20968.5	25850.2	31308	37298.4	43791	50774.1	58186.8
	Mainland Africa		2640.97	2965.44	3577.03	4429.09	5619.16	7188.54	9171.47	11620	14576.4	18097.9	22225.6	26932.6	32150.3	37830.3	43981.4	50562.8	57526.2	64827.7	72365			Mainland Africa	2640.97	2965.44	3577.03	4429.09	5619.16	7188.54	9171.47	11620	14576.4	18097.9	22225.6	26932.6	32150.3	37830.3	43981.4	50562.8	57526.2	64827.7	72365
	Neotropics		10141	11594.4	13433.3	15678.1	18491.9	21877.4	25672.7	29781.4	34141.1	38749.9	43577	48532.1	53543.2	58650	63939.4	69450	75265.4	81423.3	87893.3			Neotropics	10141	11594.4	13433.3	15678.1	18491.9	21877.4	25672.7	29781.4	34141.1	38749.9	43577	48532.1	53543.2	58650	63939.4	69450	75265.4	81423.3	87893.3
	South Asia		4986.66	6642.31	9010.92	12326.4	16826.4	22660.1	29683	37644.1	46199.2	55198	64422.6	73573.9	82275.7	90252.6	97571.7	104106	109749	114469	118142			South Asia	4986.66	6642.31	9010.92	12326.4	16826.4	22660.1	29683	37644.1	46199.2	55198	64422.6	73573.9	82275.7	90252.6	97571.7	104106	109749	114469	118142
	Southeast Asia		7919.44	10506.9	14138.5	18733.1	24166	30041.8	35906.1	41626.3	46898.3	51669.2	56282.6	60757.2	65048.2	69084.8	73228	77433.4	81830.3	86491.8	91416.6			Southeast Asia	7919.44	10506.9	14138.5	18733.1	24166	30041.8	35906.1	41626.3	46898.3	51669.2	56282.6	60757.2	65048.2	69084.8	73228	77433.4	81830.3	86491.8	91416.6
	gdgppc	SSP2	2010	2015	2020	2025	2030	2035	2040	2045	2050	2055	2060	2065	2070	2075	2080	2085	2090	2095	2100
		Madagascar	868.929	859.491	974.432	1183.3	1476.41	1856.67	2363.83	3037.23	3916.63	5032.59	6422.1	8123.66	10177.8	12611.6	15479.2	18824.7	22691.8	27097.8	32091.6
		Mainland Africa	2640.97	2958.12	3524.14	4187.3	4944.61	5791.19	6799.28	8010.01	9458.82	11216.7	13330.7	15828.5	18735.6	22080.4	25887.6	30186.7	35006.6	40348.6	46198.8
		Neotropics	10141	11590.6	13357	15179	17062.4	19024.5	21142.1	23440.1	25960.5	28757.2	31822	35141.1	38719.4	42610.5	46807.7	51321.2	56162.2	61335.2	66825.2
		South Asia	3003.11	3752.31	4772.13	5984.63	7330.84	8790.24	10428.6	12225.5	14190.2	16367.4	18802.5	21499.5	24438.6	27615.6	31042.1	34728	38694.2	42956.9	47458.7
		Southeast Asia	7919.47	10496.9	13953.9	17645.9	21195.6	24445.5	27669.7	30928.2	34083.6	37144	40350.8	43703.1	47175.7	50728.7	54485.7	58376.5	62432.6	66642	71010
	gdgppc	SSP3	2010	2015	2020	2025	2030	2035	2040	2045	2050	2055	2060	2065	2070	2075	2080	2085	2090	2095	2100
	Madagascar		868.929	859.548	966.914	1121.71	1300.61	1493.43	1725.91	2004.84	2331.17	2707.53	3135.77	3622.47	4172	4781.77	5452.12	6180.09	6968.66	7820.73	8740.9
	Mainland Africa		2640.97	2949.17	3469.98	3958.82	4381.75	4731	5071.25	5422.92	5803.59	6249.19	6772.63	7374.8	8050.8	8796.1	9601.47	10461.4	11379.7	12349	13374.9
	Neotropics		10141	11585.7	13266	14655.5	15750.3	16608.7	17388.3	18093.1	18760.1	19448	20159.1	20893.5	21650.5	22439.2	23213.8	23957.3	24686.3	25406.9	26131.7
	South Asia		3003.11	3749.44	4721.92	5675.97	6506.81	7191.41	7815.56	8351.93	8809.49	9242.08	9684.09	10149.4	10631	11123.5	11613.8	12101.2	12600.8	13117.7	13656.5
	Southeast Asia		7919.29	10483.4	13821.8	16942	19389.2	21075.3	22482.3	23687.1	24595.9	25305.5	26027.1	26766.9	27506.7	28218.3	28912.8	29532.9	30115	30680.8	31267.1
	gdgppc	SSP4	2010	2015	2020	2025	2030	2035	2040	2045	2050	2055	2060	2065	2070	2075	2080	2085	2090	2095	2100
	Madagascar		868.929	859.505	963.989	1103.53	1255.23	1395.42	1555.16	1738.53	1943.65	2170.42	2418.94	2691.87	2990.48	3311.54	3654.48	4017.47	4403.92	4817.69	5264.54
	Mainland Africa		2640.97	2944.43	3459.71	3955.93	4421.83	4811.89	5177.01	5530.11	5883.69	6271.53	6702.51	7164.49	7645.12	8141.81	8655.82	9188.13	9745.99	10325.4	10929.9
	Neotropics		10141	11583.2	13311.4	15035.4	16892	18825	20841.8	22934	25164.9	27599.5	30243.2	33030.3	35937.9	39016.6	42282.6	45724.7	49374.7	53261.8	57342.8
	South Asia		3003.11	3753.25	4759.84	5892.62	7123.05	8395.43	9730.56	11075.6	12422.1	13811.7	15271.1	16781.7	18313.9	19852.1	21408.2	22976.2	24576.6	26211.5	27849.6
	Southeast Asia		7919.41	10498.4	13974.3	17752	21573.1	25153.5	28649.8	32079.7	35271.1	38242.1	41271.9	44286.4	47215.4	49992.2	52840.5	55670.3	58534.1	61420.5	64255.7
	gdgppc	SSP5	2010	2015	2020	2025	2030	2035	2040	2045	2050	2055	2060	2065	2070	2075	2080	2085	2090	2095	2100
	Madagascar		868.929	859.53	988.424	1313.67	1936.05	2981.74	4537.05	6750.26	9780.43	13740.6	18721.7	24771.9	31942.1	40217.8	49749.1	60551.4	72659.8	86156.6	101023
	Mainland Africa		2640.97	2966.83	3593.32	4569.1	6077.11	8219.57	10991.2	14486.6	18805.5	24080.9	30433.6	37892.3	46430.3	56058	66880.3	78924	92208.8	106759	122488
	Neotropics		10141	11595.5	13474.6	16066.9	19725.5	24466.9	29902.6	35946.8	42563.4	49811.1	57697.1	66132.6	75037	84519.6	94784.8	105960	118258	131835	146727
	South Asia		3003.11	3756.51	4855.5	6542.94	9045.28	12467.6	16663.7	21555	27045.5	33169.7	39959	47382.2	55345.2	63827.9	73034.1	83025.7	93838	105544	118083
	Southeast Asia		7919.64	10512.8	14279.2	19663.7	26674.9	34662.1	42734.8	50774.6	58463.2	65823.1	73361.5	81137.8	89106.9	97201	105936	115292	125500	136731	149065

## Sheet: HUMAN POPULATION
			Primate Region	Scenario	VARIABLE	UNIT	2010	2015	2020	2025	2030	2035	2040	2045	2050	2055	2060	2065	2070	2075	2080	2085	2090	2095	2100		Primate region	Scenario	VARIABLE	UNIT	2010	2015	2020	2025	2030	2035	2040	2045	2050	2055	2060	2065	2070	2075	2080	2085	2090	2095	2100
			Madagascar	SSP1	Population	million	20.714	23.337	25.921	28.387	30.643	32.729	34.563	36.098	37.333	38.329	39.093	39.626	39.92	39.97	39.776	39.338	38.66	37.762	36.669		Madagascar	SSP1	GDP|PPP	billion US$2005/yr	17.999	20.059	25.494	35.828	53.376	81.495	123.418	183.158	264.705	370.708	502.29	658.455	837.063	1033.23	1245.31	1467.25	1692.96	1917.33	2133.65
			Madagascar	SSP2	Population	million	20.714	23.728	26.869	30.055	33.27	36.427	39.502	42.411	45.111	47.646	49.986	52.086	53.956	55.585	56.896	57.876	58.533	58.93	59.054		Madagascar	SSP2	GDP|PPP	billion US$2005/yr	17.999	20.394	26.182	35.564	49.12	67.633	93.376	128.812	176.683	239.783	321.015	423.129	549.154	701.018	880.704	1089.5	1328.22	1596.87	1895.13
			Madagascar	SSP3	Population	million	20.714	23.816	27.383	31.287	35.415	39.586	43.814	48.163	52.62	57.049	61.427	65.717	69.938	74.079	78.073	81.891	85.525	88.979	92.267		Madagascar	SSP3	GDP|PPP	billion US$2005/yr	17.999	20.471	26.477	35.095	46.061	59.119	75.619	96.559	122.666	154.462	192.621	238.058	291.781	354.229	425.663	506.094	595.995	695.881	806.497
			Madagascar	SSP4	Population	million	20.714	23.83	27.436	31.403	35.599	39.829	44.117	48.534	53.065	57.564	62.004	66.349	70.624	74.818	78.863	82.728	86.396	89.872	93.167		Madagascar	SSP4	GDP|PPP	billion US$2005/yr	17.999	20.482	26.448	34.654	44.685	55.578	68.609	84.378	103.14	124.938	149.984	178.603	211.2	247.763	288.203	332.357	380.481	432.975	490.481
			Madagascar	SSP5	Population	million	20.714	23.336	25.915	28.371	30.616	32.687	34.503	36.018	37.232	38.206	38.947	39.46	39.737	39.774	39.57	39.126	38.448	37.551	36.465		Madagascar	SSP5	GDP|PPP	billion US$2005/yr	17.999	20.058	25.615	37.27	59.274	97.464	156.542	243.131	364.145	524.972	729.153	977.501	1269.28	1599.62	1968.57	2369.13	2793.62	3235.26	3683.8
			Mainland Africa	SSP1	Population	million	990.801	1095.52	1200.39	1302.27	1397.51	1489.74	1575.89	1652.79	1718.79	1774.55	1820.06	1856.28	1882.58	1898.52	1904.34	1900.67	1888.25	1867.69	1839.15		Mainland Africa	SSP1	GDP|PPP	billion US$2005/yr	2616.67	3248.7	4293.85	5767.89	7852.85	10709.1	14453.2	19205.5	25053.8	32115.5	40452.1	49994.5	60525.5	71821.8	83755.5	96103.2	108624	121078	133090
			Mainland Africa	SSP2	Population	million	990.801	1106.23	1228.25	1352.85	1478.27	1603.44	1726.98	1846.73	1961.05	2065.66	2160.57	2247.29	2325.14	2393.34	2451.9	2500.56	2539.44	2569.52	2591.39		Mainland Africa	SSP2	GDP|PPP	billion US$2005/yr	2616.67	3272.35	4328.52	5664.78	7309.46	9285.82	11742.2	14792.4	18549.3	23169.8	28801.9	35571.2	43563	52846.1	63473.8	75483.5	88897.2	103676	119719
			Mainland Africa	SSP3	Population	million	990.801	1115.43	1254.78	1406.06	1569.17	1737.65	1912.87	2094.52	2281.12	2465.62	2645.67	2821.26	2992.45	3160.14	3322.77	3480.11	3629.68	3773.75	3910.64		Mainland Africa	SSP3	GDP|PPP	billion US$2005/yr	2616.67	3289.61	4354.06	5566.36	6875.71	8220.85	9700.62	11358.4	13238.7	15408.2	17918.2	20806.3	24091.6	27796.9	31903.5	36407	41304.5	46602	52304.2
			Mainland Africa	SSP4	Population	million	990.801	1113.2	1248.2	1392.29	1546.01	1703.71	1866.35	2033.34	2203.01	2369.15	2529.59	2684.84	2834.96	2980.72	3120.53	3254.32	3380.05	3500.15	3613.01		Mainland Africa	SSP4	GDP|PPP	billion US$2005/yr	2616.67	3277.73	4318.41	5507.81	6836.2	8198.05	9662.12	11244.6	12961.8	14858.2	16954.6	19235.5	21673.6	24268.4	27010.7	29901.2	32941.9	36140.3	39489.7
			Mainland Africa	SSP5	Population	million	990.801	1094.88	1198.2	1297.15	1388.95	1477.28	1559.02	1631.07	1691.85	1742.17	1782.06	1813.19	1835.05	1847.31	1850.26	1844.6	1831.07	1810.28	1782.41		Mainland Africa	SSP5	GDP|PPP	billion US$2005/yr	2616.67	3248.32	4305.52	5926.79	8440.78	12142.6	17135.6	23628.7	31816.1	41952.9	54234.6	68706.2	85201.9	103556	123746	145583	168840	193263	218324
			Neotropics	SSP1	Population	million	529.062	554.499	575.543	592.343	604.531	613.154	617.848	618.566	615.296	608.65	598.912	586.844	572.688	556.601	538.793	518.815	496.229	471.523	444.956		Neotropics	SSP1	GDP|PPP	billion US$2005/yr	5365.21	6429.09	7731.45	9286.78	11178.9	13414.2	15861.8	18421.8	21006.9	23585.2	26098.8	28480.8	30663.5	32644.7	34450.1	36031.7	37348.9	38393	39108.7
			Neotropics	SSP2	Population	million	529.062	557.561	584.169	608.228	629.116	646.563	660.648	671.252	678.206	681.497	681.525	679.2	674.845	668.508	660.452	650.934	640.41	629.285	617.798		Neotropics	SSP2	GDP|PPP	billion US$2005/yr	5365.21	6462.48	7802.77	9232.29	10734.2	12300.5	13967.5	15734.2	17606.6	19597.9	21687.5	23867.8	26129.6	28485.5	30914.2	33406.7	35966.8	38597.3	41284.5
			Neotropics	SSP3	Population	million	529.062	561.116	595.303	630.141	664.177	695.756	725.499	753.915	780.974	805.957	828.914	850.581	871.442	891.783	911.948	932.206	952.867	974.174	996.155		Neotropics	SSP3	GDP|PPP	billion US$2005/yr	5365.21	6500.94	7897.31	9235.06	10461	11555.6	12615.2	13640.7	14651.1	15674.2	16710.1	17771.6	18867.1	20010.9	21169.8	22333.2	23522.8	24750.8	26031.3
			Neotropics	SSP4	Population	million	529.062	556.381	581.255	602.29	618.646	631.13	639.582	643.942	644.166	640.758	634.003	624.731	613.253	599.839	584.941	568.912	552.224	535.186	518.106		Neotropics	SSP4	GDP|PPP	billion US$2005/yr	5365.21	6444.65	7737.3	9055.66	10450.1	11881	13330.1	14768.2	16210.4	17684.6	19174.3	20635	22039.1	23403.7	24732.8	26013.3	27265.9	28505	29709.7
			Neotropics	SSP5	Population	million	529.062	553.685	572.982	587.002	596.253	601.868	603.531	601.253	595.092	585.678	573.33	559.121	543.297	526.032	507.529	487.366	465.098	441.194	415.912		Neotropics	SSP5	GDP|PPP	billion US$2005/yr	5365.21	6420.27	7720.71	9431.3	11761.4	14725.9	18047.2	21613.1	25329.1	29173.3	33079.5	36976.1	40767.4	44460	48106	51641.4	55001.7	58164.8	61025.5
			South Asia	SSP1	Population	million	1660.5	1769.6	1867.72	1952.87	2023.18	2083.27	2130.86	2164.62	2183.07	2187.04	2176.36	2151.8	2114.16	2064.08	2002.75	1931.62	1852.66	1767.79	1679.03		South Asia	SSP1	GDP|PPP	billion US$2005/yr	4986.66	6642.31	9010.92	12326.4	16826.4	22660.1	29683	37644.1	46199.2	55198	64422.6	73573.9	82275.7	90252.6	97571.7	104106	109749	114469	118142
			South Asia	SSP2	Population	million	1660.5	1783.63	1905.61	2020.16	2125.44	2223.48	2312.91	2392.78	2459.71	2511.8	2547.02	2567.16	2574.66	2570.3	2554.31	2527.76	2492.64	2450.29	2403.54		South Asia	SSP2	GDP|PPP	billion US$2005/yr	4986.66	6692.72	9093.79	12089.9	15581.3	19544.9	24120.5	29252.9	34903.9	41111.6	47890.4	55192.7	62921.3	70980.5	79291.2	87784	96450.9	105257	114069
			South Asia	SSP3	Population	million	1660.5	1794.75	1940.49	2089.17	2238.15	2382.81	2527.39	2673.7	2818.83	2956.03	3083.12	3201.69	3314.94	3425.14	3532.23	3635.44	3734.99	3831.25	3923.89		South Asia	SSP3	GDP|PPP	billion US$2005/yr	4986.66	6729.3	9162.82	11858.1	14563.2	17135.7	19752.9	22330.6	24832.5	27319.9	29857.2	32495.2	35241	38099.6	41022.6	43993.3	47063.7	50257.2	53586.8
			South Asia	SSP4	Population	million	1660.5	1780.21	1899.21	2008.84	2106.06	2193.84	2272.14	2341.03	2397.81	2440.08	2466.48	2478.21	2477.43	2466.2	2446.24	2419.4	2386.86	2350.25	2311.12		South Asia	SSP4	GDP|PPP	billion US$2005/yr	4986.66	6681.57	9039.95	11837.3	15001.5	18418.2	22109.2	25928.3	29785.8	33701.6	37665.9	41588.5	45371.3	48959.2	52369.5	55588.8	58661	61603.6	64363.6
			South Asia	SSP5	Population	million	1660.5	1768.71	1865.56	1948.59	2016.58	2074.21	2119.18	2150.19	2165.83	2166.98	2153.54	2126.62	2087.05	2035.52	1973.24	1901.67	1822.76	1738.42	1650.61		South Asia	SSP5	GDP|PPP	billion US$2005/yr	4986.66	6644.18	9058.23	12749.5	18240.5	25860.5	35313.5	46347.5	58575.9	71878	86053.2	100764	115508	129923	144114	157888	171045	183480	194908
			Southeast Asia	SSP1	Population	million	2105.17	2154.03	2188.88	2206.6	2207.14	2193.82	2165.85	2123.9	2069.33	2004.78	1932.17	1854.08	1771.79	1686.85	1599.6	1510.04	1419.33	1327.81	1235.32		Southeast Asia	SSP1	GDP|PPP	billion US$2005/yr	16671.8	22632.2	30947.6	41336.3	53337.7	65906.2	77767.1	88410	97048.1	103585	108747	112649	115252	116536	117136	116927	116144	114845	112929
			Southeast Asia	SSP2	Population	million	2105.16	2159.56	2204.1	2234.06	2248.75	2247.76	2231.53	2201.45	2158.79	2106.51	2047.12	1983.57	1917.19	1848.81	1779.01	1709.02	1640.93	1576.19	1514.96		Southeast Asia	SSP2	GDP|PPP	billion US$2005/yr	16671.8	22668.7	30755.9	39422.1	47663.5	54947.6	61745.7	68086.9	73579.3	78244	82602.7	86688	90445.1	93787.7	96930.9	99766.3	102448	105040	107578
			Southeast Asia	SSP3	Population	million	2105.21	2163.65	2216.59	2258.3	2286.74	2298.32	2295.36	2281.45	2259.78	2231.3	2198.97	2166.1	2134.24	2104.27	2078.11	2057.6	2043.64	2035.62	2032.3		Southeast Asia	SSP3	GDP|PPP	billion US$2005/yr	16671.8	22682.3	30637.2	38260.1	44338.1	48437.7	51605	54041	55581.1	56464.3	57232.9	57979.8	58705.9	59378.8	60084	60767	61544.3	62454.7	63544.1
			Southeast Asia	SSP4	Population	million	2105.18	2153.86	2188.94	2206.1	2204.97	2187.71	2154.49	2106.61	2045.78	1974.5	1895.61	1812.51	1726.9	1640.07	1552.9	1466.81	1384.08	1306.21	1233.57		Southeast Asia	SSP4	GDP|PPP	billion US$2005/yr	16671.8	22612.2	30589	39162.7	47568.1	55028.5	61725.7	67579.5	72156.8	75509	78235.7	80269.4	81536.4	81990.7	82056.1	81657.8	81015.9	80227.7	79263.7
			Southeast Asia	SSP5	Population	million	2105.12	2153.92	2188.84	2206.67	2207.61	2194.8	2167.45	2126.27	2072.63	2009.13	1937.73	1861.09	1780.3	1696.97	1611.44	1523.7	1434.91	1345.39	1254.92		Southeast Asia	SSP5	GDP|PPP	billion US$2005/yr	16671.8	22643.6	31254.7	43391.4	58887.7	76076.5	92625.8	107961	121173	132247	142155	151004	158637	164947	170709	175671	180081	183956	187066
		MADAGASCAR	2010	2015	2020	2025	2030	2035	2040	2045	2050	2055	2060	2065	2070	2075	2080	2085	2090	2095	2100
		SSP1	20.714	23.337	25.921	28.387	30.643	32.729	34.563	36.098	37.333	38.329	39.093	39.626	39.92	39.97	39.776	39.338	38.66	37.762	36.669
		SSP2	20.714	23.728	26.869	30.055	33.27	36.427	39.502	42.411	45.111	47.646	49.986	52.086	53.956	55.585	56.896	57.876	58.533	58.93	59.054
		SSP3	20.714	23.816	27.383	31.287	35.415	39.586	43.814	48.163	52.62	57.049	61.427	65.717	69.938	74.079	78.073	81.891	85.525	88.979	92.267
		SSP4	20.714	23.83	27.436	31.403	35.599	39.829	44.117	48.534	53.065	57.564	62.004	66.349	70.624	74.818	78.863	82.728	86.396	89.872	93.167
		SSP5	20.714	23.336	25.915	28.371	30.616	32.687	34.503	36.018	37.232	38.206	38.947	39.46	39.737	39.774	39.57	39.126	38.448	37.551	36.465
		Mainland Africa	2010	2015	2020	2025	2030	2035	2040	2045	2050	2055	2060	2065	2070	2075	2080	2085	2090	2095	2100
		SSP1	990.801	1095.52	1200.39	1302.27	1397.51	1489.74	1575.89	1652.79	1718.79	1774.55	1820.06	1856.28	1882.58	1898.52	1904.34	1900.67	1888.25	1867.69	1839.15
		SSP2	990.801	1106.23	1228.25	1352.85	1478.27	1603.44	1726.98	1846.73	1961.05	2065.66	2160.57	2247.29	2325.14	2393.34	2451.9	2500.56	2539.44	2569.52	2591.39
		SSP3	990.801	1115.43	1254.78	1406.06	1569.17	1737.65	1912.87	2094.52	2281.12	2465.62	2645.67	2821.26	2992.45	3160.14	3322.77	3480.11	3629.68	3773.75	3910.64
		SSP4	990.801	1113.2	1248.2	1392.29	1546.01	1703.71	1866.35	2033.34	2203.01	2369.15	2529.59	2684.84	2834.96	2980.72	3120.53	3254.32	3380.05	3500.15	3613.01
		SSP5	990.801	1094.88	1198.2	1297.15	1388.95	1477.28	1559.02	1631.07	1691.85	1742.17	1782.06	1813.19	1835.05	1847.31	1850.26	1844.6	1831.07	1810.28	1782.41
		Neotropics	2010	2015	2020	2025	2030	2035	2040	2045	2050	2055	2060	2065	2070	2075	2080	2085	2090	2095	2100
		SSP1	529.062	554.499	575.543	592.343	604.531	613.154	617.848	618.566	615.296	608.65	598.912	586.844	572.688	556.601	538.793	518.815	496.229	471.523	444.956
		SSP2	529.062	557.561	584.169	608.228	629.116	646.563	660.648	671.252	678.206	681.497	681.525	679.2	674.845	668.508	660.452	650.934	640.41	629.285	617.798
		SSP3	529.062	561.116	595.303	630.141	664.177	695.756	725.499	753.915	780.974	805.957	828.914	850.581	871.442	891.783	911.948	932.206	952.867	974.174	996.155
		SSP4	529.062	556.381	581.255	602.29	618.646	631.13	639.582	643.942	644.166	640.758	634.003	624.731	613.253	599.839	584.941	568.912	552.224	535.186	518.106
		SSP5	529.062	553.685	572.982	587.002	596.253	601.868	603.531	601.253	595.092	585.678	573.33	559.121	543.297	526.032	507.529	487.366	465.098	441.194	415.912
		South Asia	2010	2015	2020	2025	2030	2035	2040	2045	2050	2055	2060	2065	2070	2075	2080	2085	2090	2095	2100
		SSP1	1660.5	1769.6	1867.72	1952.87	2023.18	2083.27	2130.86	2164.62	2183.07	2187.04	2176.36	2151.8	2114.16	2064.08	2002.75	1931.62	1852.66	1767.79	1679.03
		SSP2	1660.5	1783.63	1905.61	2020.16	2125.44	2223.48	2312.91	2392.78	2459.71	2511.8	2547.02	2567.16	2574.66	2570.3	2554.31	2527.76	2492.64	2450.29	2403.54
		SSP3	1660.5	1794.75	1940.49	2089.17	2238.15	2382.81	2527.39	2673.7	2818.83	2956.03	3083.12	3201.69	3314.94	3425.14	3532.23	3635.44	3734.99	3831.25	3923.89
		SSP4	1660.5	1780.21	1899.21	2008.84	2106.06	2193.84	2272.14	2341.03	2397.81	2440.08	2466.48	2478.21	2477.43	2466.2	2446.24	2419.4	2386.86	2350.25	2311.12
		SSP5	1660.5	1768.71	1865.56	1948.59	2016.58	2074.21	2119.18	2150.19	2165.83	2166.98	2153.54	2126.62	2087.05	2035.52	1973.24	1901.67	1822.76	1738.42	1650.61
		Southeast Asia	2010	2015	2020	2025	2030	2035	2040	2045	2050	2055	2060	2065	2070	2075	2080	2085	2090	2095	2100
		SSP1	2105.17	2154.03	2188.88	2206.6	2207.14	2193.82	2165.85	2123.9	2069.33	2004.78	1932.17	1854.08	1771.79	1686.85	1599.6	1510.04	1419.33	1327.81	1235.32
		SSP2	2105.16	2159.56	2204.1	2234.06	2248.75	2247.76	2231.53	2201.45	2158.79	2106.51	2047.12	1983.57	1917.19	1848.81	1779.01	1709.02	1640.93	1576.19	1514.96
		SSP3	2105.21	2163.65	2216.59	2258.3	2286.74	2298.32	2295.36	2281.45	2259.78	2231.3	2198.97	2166.1	2134.24	2104.27	2078.11	2057.6	2043.64	2035.62	2032.3
		SSP4	2105.18	2153.86	2188.94	2206.1	2204.97	2187.71	2154.49	2106.61	2045.78	1974.5	1895.61	1812.51	1726.9	1640.07	1552.9	1466.81	1384.08	1306.21	1233.57
		SSP5	2105.12	2153.92	2188.84	2206.67	2207.61	2194.8	2167.45	2126.27	2072.63	2009.13	1937.73	1861.09	1780.3	1696.97	1611.44	1523.7	1434.91	1345.39	1254.92
